# Supplementary material for: Association of B cells and the risk of glioblastoma: a bidirectional two sample mendelian randomization study
Source: Research Square preprint supplement (doi:10.21203/rs.3.rs-6212888/v1), 2025-03-21
Supplement: Supplementary file 1 [file 4d96441c7fc653ea9b6296eb.docx]

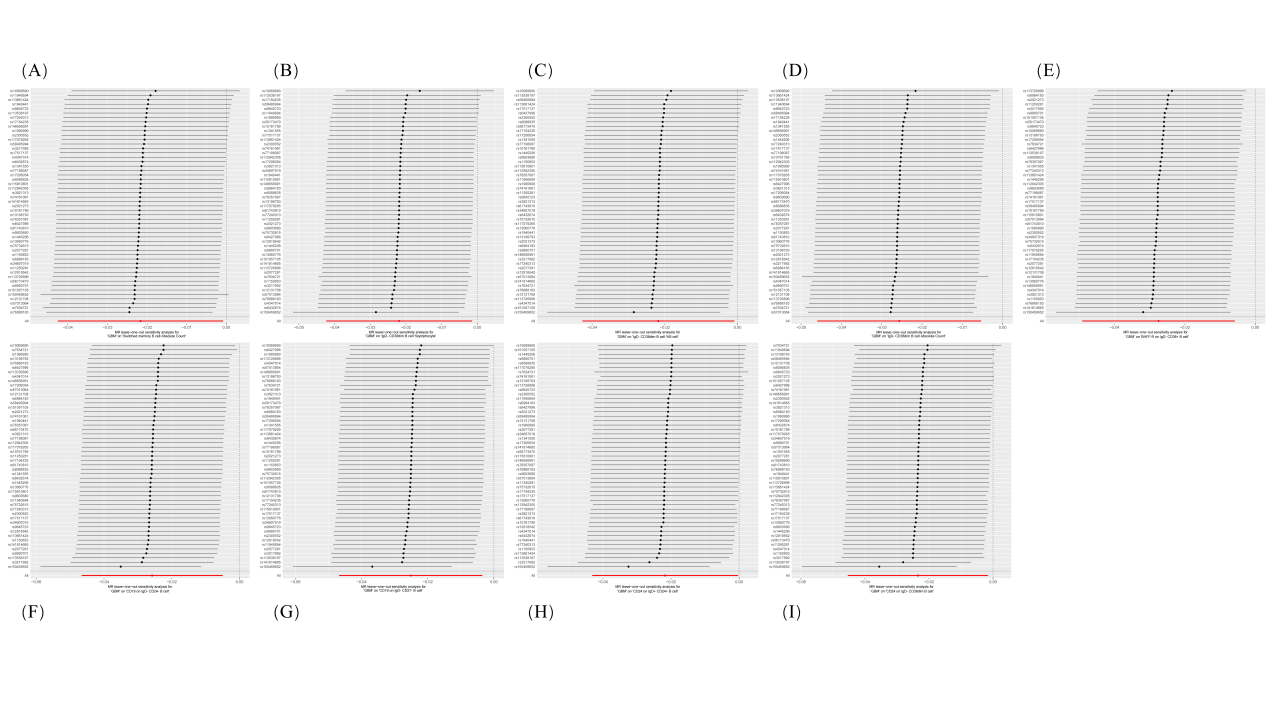


Fig. 6 leave-one-out sensitivity analysis showing significantly causal relationships between GBM and nine kinds of B cell traits.


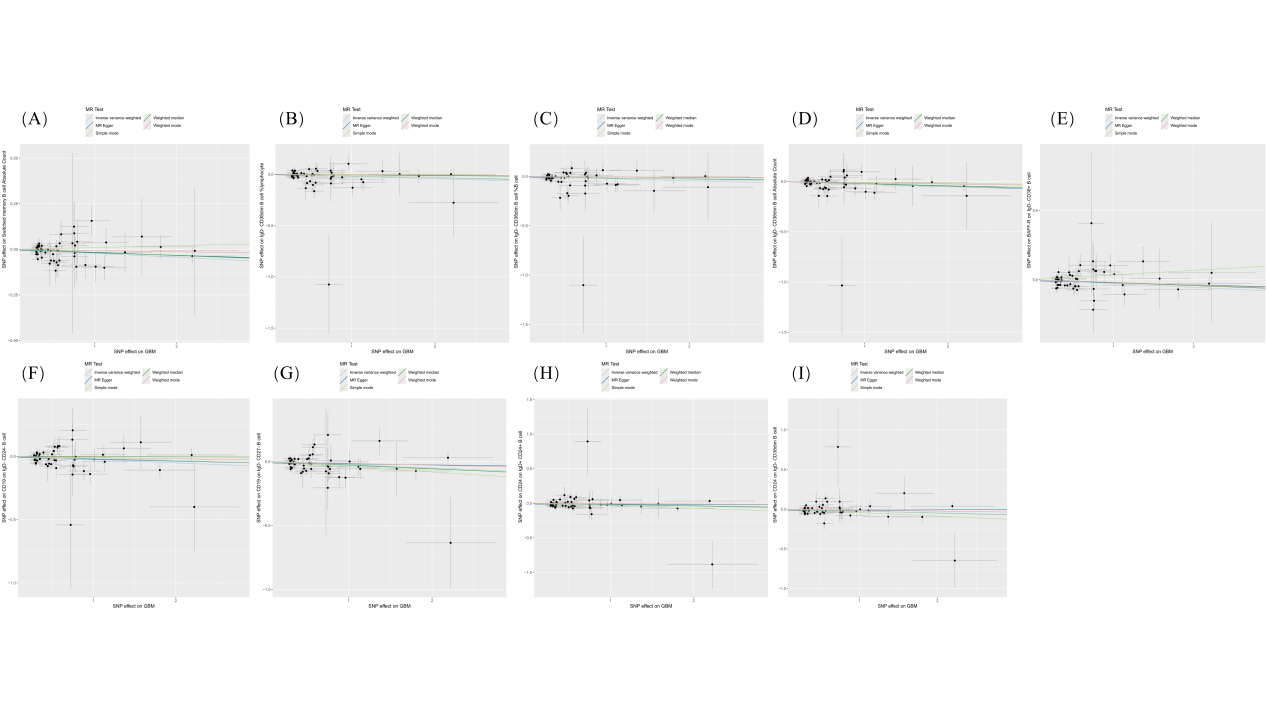


Fig. 7 Scatter plots showing significantly causal relationships between GBM and nine kinds of B cell traits.
