# Supplementary material for: Association of B cells and the risk of glioblastoma: a bidirectional two sample mendelian randomization study
Source: Research Square preprint supplement (doi:10.21203/rs.3.rs-6212888/v1), 2025-03-21
Supplement: Supplementary file 2 [file f74f5da98764bf175372ea77.xlsx]

## Sheet: 补充表1
Supplemental Table 1. All SNPS associated with GBM and b cell phenotypes were analyzed in this study
SNP	pval	pos	samplesize	beta	se	effect_allele	other_allele	eaf	exposure	mr_keep	pval_origin	data_source
rs10069690	1.59038e-11	1279675	379155	0.465344	0.0690484	T	C	0.295524	GBM	TRUE	reported	textfile
rs10161789	1.32321e-05	81571012	379155	0.359629	0.082555	A	G	0.178212	GBM	TRUE	reported	textfile
rs11250281	1.58154e-05	1129954	379155	-0.303944	0.0704062	G	A	0.418474	GBM	TRUE	reported	textfile
rs112942305	1.18092e-05	17026506	379155	0.727745	0.166111	G	A	0.0257718	GBM	TRUE	reported	textfile
rs113538197	9.94535e-06	183665316	379155	-0.568811	0.128738	C	G	0.101139	GBM	TRUE	reported	textfile
rs113661424	3.16009e-05	36489906	379155	-1.11723	0.26846	T	C	0.0318631	GBM	TRUE	reported	textfile
rs113726896	3.50736e-06	38263316	379155	0.760583	0.163967	T	C	0.0271713	GBM	TRUE	reported	textfile
rs1150853	1.55805e-05	6289265	379155	-0.318831	0.0737981	C	G	0.727913	GBM	TRUE	reported	textfile
rs115810801	5.22685e-06	202671440	379155	0.751685	0.165007	G	A	0.027272	GBM	TRUE	reported	textfile
rs117078265	2.57502e-05	69008	379155	0.775867	0.184374	C	A	0.0213254	GBM	TRUE	reported	textfile
rs11940694	3.039e-05	39413373	379155	0.305128	0.0731629	G	A	0.648255	GBM	TRUE	reported	textfile
rs1194600	2.42371e-05	154263533	379155	0.295071	0.0698923	C	G	0.582629	GBM	TRUE	reported	textfile
rs12131708	2.32879e-05	5726264	379155	0.304434	0.071957	A	G	0.314858	GBM	TRUE	reported	textfile
rs12818542	4.72868e-05	119350053	379155	-0.590501	0.145135	A	G	0.0812131	GBM	TRUE	reported	textfile
rs13060776	2.15839e-05	11596842	379155	0.300473	0.0707355	G	A	0.584585	GBM	TRUE	reported	textfile
rs13198793	3.37987e-05	148262012	379155	-0.307041	0.074053	T	C	0.3461	GBM	TRUE	reported	textfile
rs1341555	4.63223e-05	231933311	379155	-0.285944	0.0701971	T	C	0.423122	GBM	TRUE	reported	textfile
rs141814665	3.03487e-05	16421360	379155	1.37034	0.328553	C	T	0.00425315	GBM	TRUE	reported	textfile
rs1445206	4.12658e-05	9164473	379155	0.344031	0.0839044	G	A	0.750802	GBM	TRUE	reported	textfile
rs146656991	6.27451e-06	192080471	379155	-0.886621	0.196289	A	G	0.0556639	GBM	TRUE	reported	textfile
rs150459652	4.88922e-05	30517582	379155	2.19113	0.539572	G	A	0.00096125	GBM	TRUE	reported	textfile
rs151057105	1.51269e-08	54877227	379155	0.531274	0.0938627	T	C	0.110556	GBM	TRUE	reported	textfile
rs17154235	1.24091e-05	26653363	379155	1.01168	0.231492	G	A	0.0116754	GBM	TRUE	reported	textfile
rs17206054	2.91991e-05	81356767	379155	0.755999	0.180877	G	A	0.0215811	GBM	TRUE	reported	textfile
rs17517137	4.64259e-05	171891324	379155	0.53536	0.131444	A	G	0.0523556	GBM	TRUE	reported	textfile
rs1940441	6.44718e-06	395016	379155	0.354008	0.0784737	C	G	0.205879	GBM	TRUE	reported	textfile
rs1990990	7.80243e-06	32870888	379155	0.303885	0.0679751	T	C	0.449996	GBM	TRUE	reported	textfile
rs2021273	2.12192e-05	38779494	379155	-0.549485	0.12924	G	T	0.948038	GBM	TRUE	reported	textfile
rs2077281	2.80757e-05	64843634	379155	-0.572139	0.136596	T	G	0.094186	GBM	TRUE	reported	textfile
rs2300552	2.74992e-05	96240801	379155	0.285287	0.0680349	A	G	0.457913	GBM	TRUE	reported	textfile
rs3217992	2.73577e-08	22003224	379155	-0.397531	0.0715297	T	C	0.38625	GBM	TRUE	reported	textfile
rs34607019	3.4306e-05	6693455	379155	0.352392	0.0850609	C	T	0.168122	GBM	TRUE	reported	textfile
rs3821313	3.07936e-05	75092575	379155	0.461581	0.110757	A	G	0.0797877	GBM	TRUE	reported	textfile
rs4347014	2.94863e-05	6282866	379155	-0.490695	0.117464	C	T	0.125317	GBM	TRUE	reported	textfile
rs56173470	3.3024e-05	91567239	379155	1.13954	0.274486	A	G	0.00683915	GBM	TRUE	reported	textfile
rs56382816	6.35229e-06	73039776	379155	2.82783	0.626415	CTATTTTATTTTATTTTATTT	C	0.000374853	GBM	TRUE	reported	textfile
rs57013064	7.01423e-06	80640023	379155	0.32087	0.0714115	T	C	0.306624	GBM	TRUE	reported	textfile
rs58495994	2.90315e-06	104165979	379155	0.551781	0.117964	T	A	0.0668399	GBM	TRUE	reported	textfile
rs61743810	4.59791e-05	68746559	379155	0.787339	0.193203	C	G	0.0193658	GBM	TRUE	reported	textfile
rs6427996	6.36414e-06	203244262	379155	-0.429169	0.0950768	T	A	0.883364	GBM	TRUE	reported	textfile
rs6432674	1.90082e-05	161168811	379155	0.289633	0.0677309	T	G	0.429409	GBM	TRUE	reported	textfile
rs6984183	2.09363e-05	82290582	379155	-0.289547	0.0680541	G	A	0.585159	GBM	TRUE	reported	textfile
rs74161061	3.97521e-05	117889341	379155	2.22266	0.540937	A	G	0.000938811	GBM	TRUE	reported	textfile
rs75732615	4.73642e-05	140558112	379155	0.74736	0.183705	A	G	0.0225848	GBM	TRUE	reported	textfile
rs7634721	3.6637e-05	46425499	379155	-1.80648	0.437645	G	A	0.0178386	GBM	TRUE	reported	textfile
rs76888183	1.90305e-05	131836309	379155	0.962439	0.225081	G	A	0.013226	GBM	TRUE	reported	textfile
rs77198087	1.15417e-05	152538086	379155	0.449866	0.102567	A	G	0.100953	GBM	TRUE	reported	textfile
rs77240313	4.44846e-05	45732782	379155	0.522233	0.127908	T	C	0.054348	GBM	TRUE	reported	textfile
rs78357087	1.85524e-05	97243201	379155	0.750021	0.175172	C	G	0.0237053	GBM	TRUE	reported	textfile
rs8088835	4.03543e-05	3728055	379155	0.339884	0.0827887	T	A	0.185768	GBM	TRUE	reported	textfile
rs9603680	2.31457e-05	40121083	379155	1.57594	0.372372	C	A	0.00263747	GBM	TRUE	reported	textfile
rs9645723	4.98758e-05	129069956	379155	-0.501819	0.123716	T	C	0.108046	GBM	TRUE	reported	textfile
rs9890701	9.25401e-06	73537701	379155	0.319413	0.0720387	C	T	0.623495	GBM	TRUE	reported	textfile
rs6680891	2.22e-06	164083691	3660	0.1446	0.03051	T	A	0.2122	BAFF-R on B cell	TRUE	reported	textfile
rs72658947	5.92e-06	30372026	3660	-0.4075	0.08984	C	G	0.0187	BAFF-R on B cell	TRUE	reported	textfile
rs1801274	1.86e-10	161479745	3660	-0.1724	0.02698	G	A	0.3253	BAFF-R on B cell	TRUE	reported	textfile
rs149153670	7.1e-06	142280835	3660	-0.5399	0.12	C	T	0.0117	BAFF-R on B cell	TRUE	reported	textfile
rs2925323	3.06e-06	101658926	3660	-0.1313	0.0281	T	C	0.2922	BAFF-R on B cell	TRUE	reported	textfile
rs116470335	3.66e-06	24492147	3660	1.525	0.329	A	G	0.0016	BAFF-R on B cell	TRUE	reported	textfile
rs12529650	5.2e-06	1751206	3660	0.1199	0.02628	T	G	0.3253	BAFF-R on B cell	TRUE	reported	textfile
rs56020760	5.01e-06	72391681	3660	-0.2399	0.05248	T	C	0.0607	BAFF-R on B cell	TRUE	reported	textfile
rs1563991	3.31e-06	37670518	3660	0.148	0.03178	T	G	0.8063	BAFF-R on B cell	TRUE	reported	textfile
rs143106266	2.01e-06	29908421	3660	-1.177	0.2473	A	C	0.0025	BAFF-R on B cell	TRUE	reported	textfile
rs148563640	8.65e-06	48145906	3660	0.382	0.08575	T	C	0.0219	BAFF-R on B cell	TRUE	reported	textfile
rs5757678	2.44e-16	39843409	3660	0.2136	0.02594	T	C	0.6419	BAFF-R on B cell	TRUE	reported	textfile
rs1894588	1.71e-23	40629980	3660	-0.5142	0.05113	T	C	0.0622	BAFF-R on B cell	TRUE	reported	textfile
rs149806587	2.5e-20	40774205	3660	-0.5338	0.05744	G	A	0.0526	BAFF-R on B cell	TRUE	reported	textfile
rs73165129	1e-200	42315371	3660	-1.496	0.03385	T	C	0.099	BAFF-R on B cell	TRUE	reported	textfile
rs149398740	5.82e-06	23924845	3660	-1.088	0.2397	T	C	0.0027	BAFF-R on B cell	TRUE	reported	textfile
rs117430146	3.61e-08	41998660	3660	0.3083	0.05583	C	G	0.056	BAFF-R on B cell	TRUE	reported	textfile
rs76146864	1.97e-19	40246055	3660	-0.7056	0.07783	T	C	0.0264	BAFF-R on B cell	TRUE	reported	textfile
rs1081003	4.65e-32	42525756	3660	-0.5326	0.04476	A	G	0.0874	BAFF-R on B cell	TRUE	reported	textfile
rs117705111	1.97e-29	41957510	3660	-0.7406	0.06518	A	G	0.0365	BAFF-R on B cell	TRUE	reported	textfile
rs5759079	3.75e-34	43393437	3660	-0.4435	0.03602	A	G	0.1407	BAFF-R on B cell	TRUE	reported	textfile
rs2066978	2.97e-06	7928759	3648	-0.1359	0.02904	C	T	0.2234	BAFF-R on CD20-	TRUE	reported	textfile
rs35368132	5.34e-07	183179545	3648	0.1457	0.02901	C	T	0.7767	BAFF-R on CD20-	TRUE	reported	textfile
rs72683736	2.87e-07	162422182	3648	-0.1896	0.03688	A	C	0.1201	BAFF-R on CD20-	TRUE	reported	textfile
rs57396181	3.73e-06	155520414	3648	-1.065	0.2298	C	G	0.0027	BAFF-R on CD20-	TRUE	reported	textfile
rs7826226	6.47e-06	61322563	3648	-0.1496	0.03312	C	A	0.1539	BAFF-R on CD20-	TRUE	reported	textfile
rs79373846	7.85e-06	127988956	3648	0.2038	0.04553	A	T	0.0776	BAFF-R on CD20-	TRUE	reported	textfile
rs182211529	5.76e-07	3574110	3648	0.6685	0.1335	T	C	0.0084	BAFF-R on CD20-	TRUE	reported	textfile
rs140785480	3.28e-06	61781933	3648	-0.4347	0.09328	C	A	0.0193	BAFF-R on CD20-	TRUE	reported	textfile
rs145320860	1.32e-06	62765406	3648	-0.6925	0.1429	A	G	0.0077	BAFF-R on CD20-	TRUE	reported	textfile
rs73346463	6.43e-06	100063947	3648	-0.4227	0.09356	T	G	0.0171	BAFF-R on CD20-	TRUE	reported	textfile
rs142808203	7.02e-06	53123747	3648	-0.4942	0.1098	A	C	0.013	BAFF-R on CD20-	TRUE	reported	textfile
rs5996087	1.03e-25	42321591	3648	-0.4215	0.0399	G	A	0.0998	BAFF-R on CD20-	TRUE	reported	textfile
rs149192849	1.37e-06	42270864	3648	-0.2588	0.05351	C	T	0.0537	BAFF-R on CD20-	TRUE	reported	textfile
rs191405504	4.53e-06	41305796	3648	-0.258	0.05617	T	A	0.0533	BAFF-R on CD20-	TRUE	reported	textfile
rs4664360	6.57e-06	161569376	3592	-0.1252	0.02775	G	A	0.7333	BAFF-R on CD20- CD38-	TRUE	reported	textfile
rs12630507	2.07e-06	141650463	3592	-0.699	0.147	A	G	0.0068	BAFF-R on CD20- CD38-	TRUE	reported	textfile
rs35744279	2.67e-07	190520073	3592	0.2764	0.05361	T	A	0.0585	BAFF-R on CD20- CD38-	TRUE	reported	textfile
rs72664998	5.51e-06	69444614	3592	0.7379	0.1621	G	A	0.0057	BAFF-R on CD20- CD38-	TRUE	reported	textfile
rs12311737	3.34e-06	131958370	3592	0.1489	0.03198	G	C	0.1807	BAFF-R on CD20- CD38-	TRUE	reported	textfile
rs1628296	9.35e-06	123309183	3592	-0.3324	0.07489	T	C	0.0305	BAFF-R on CD20- CD38-	TRUE	reported	textfile
rs4406935	4.68e-06	106357764	3592	0.1796	0.03917	A	C	0.8899	BAFF-R on CD20- CD38-	TRUE	reported	textfile
rs1780947	2.46e-06	20326938	3592	0.3305	0.07004	T	C	0.0781	BAFF-R on CD20- CD38-	TRUE	reported	textfile
rs111901500	6.1e-06	48900270	3592	0.1682	0.03714	T	C	0.1254	BAFF-R on CD20- CD38-	TRUE	reported	textfile
rs78083064	7.73e-06	11821999	3592	1.949	0.4351	T	A	0.0008	BAFF-R on CD20- CD38-	TRUE	reported	textfile
rs117920411	6.27e-06	16968389	3592	0.5393	0.1192	A	C	0.0111	BAFF-R on CD20- CD38-	TRUE	reported	textfile
rs117783732	3.41e-07	78797349	3592	-0.6863	0.1343	G	T	0.0084	BAFF-R on CD20- CD38-	TRUE	reported	textfile
rs139785721	7.78e-06	27211620	3592	0.5232	0.1169	A	G	0.0113	BAFF-R on CD20- CD38-	TRUE	reported	textfile
rs117457546	9.13e-06	8466710	3592	-0.3636	0.08184	T	C	0.0216	BAFF-R on CD20- CD38-	TRUE	reported	textfile
rs191405504	1.79e-06	41305796	3592	-0.2722	0.0569	T	A	0.0533	BAFF-R on CD20- CD38-	TRUE	reported	textfile
rs73163382	4.53e-06	42251917	3592	-0.2506	0.05457	C	G	0.0533	BAFF-R on CD20- CD38-	TRUE	reported	textfile
rs185749756	1.89e-06	39920299	3592	-0.6404	0.1342	G	A	0.0081	BAFF-R on CD20- CD38-	TRUE	reported	textfile
rs73165129	6.75e-37	42315371	3592	-0.5191	0.04044	T	C	0.0987	BAFF-R on CD20- CD38-	TRUE	reported	textfile
rs4657041	1.22e-07	161478859	3657	-0.1431	0.02699	C	T	0.3344	BAFF-R on CD24+ CD27+	TRUE	reported	textfile
rs6680891	5.37e-06	164083691	3657	0.139	0.03051	T	A	0.2122	BAFF-R on CD24+ CD27+	TRUE	reported	textfile
rs2925323	5.13e-06	101658926	3657	-0.1283	0.02811	T	C	0.2923	BAFF-R on CD24+ CD27+	TRUE	reported	textfile
rs116470335	2.25e-06	24492147	3657	1.559	0.3291	A	G	0.0016	BAFF-R on CD24+ CD27+	TRUE	reported	textfile
rs56020760	4.74e-06	72391681	3657	-0.2405	0.05248	T	C	0.0607	BAFF-R on CD24+ CD27+	TRUE	reported	textfile
rs116897208	5.81e-06	15100608	3657	-1.236	0.2722	C	T	0.0022	BAFF-R on CD24+ CD27+	TRUE	reported	textfile
rs143106266	1.27e-06	29908421	3657	-1.2	0.2472	A	C	0.0025	BAFF-R on CD24+ CD27+	TRUE	reported	textfile
rs1885397	4.6e-06	55233098	3657	-0.1484	0.03233	C	A	0.1903	BAFF-R on CD24+ CD27+	TRUE	reported	textfile
rs185794015	2.96e-07	44440180	3657	-0.3998	0.07785	C	T	0.0264	BAFF-R on CD24+ CD27+	TRUE	reported	textfile
rs117086217	1.08e-13	39876838	3657	-0.5014	0.06723	G	A	0.0343	BAFF-R on CD24+ CD27+	TRUE	reported	textfile
rs9614288	9.65e-28	44297686	3657	-0.3203	0.0291	T	A	0.2346	BAFF-R on CD24+ CD27+	TRUE	reported	textfile
rs73165129	1e-200	42315371	3657	-1.493	0.03391	T	C	0.099	BAFF-R on CD24+ CD27+	TRUE	reported	textfile
rs5758649	7.31e-42	42605548	3657	-0.6147	0.04478	T	C	0.0871	BAFF-R on CD24+ CD27+	TRUE	reported	textfile
rs146069723	1.06e-32	43339331	3657	-0.574	0.04773	T	C	0.0756	BAFF-R on CD24+ CD27+	TRUE	reported	textfile
rs187315152	2.39e-18	41305795	3657	-0.5139	0.05851	T	A	0.0535	BAFF-R on CD24+ CD27+	TRUE	reported	textfile
rs528009599	3.1e-18	40568020	3657	-1.076	0.1229	A	G	0.0111	BAFF-R on CD24+ CD27+	TRUE	reported	textfile
rs13058590	3.16e-10	39641412	3657	-0.3738	0.05926	T	C	0.0468	BAFF-R on CD24+ CD27+	TRUE	reported	textfile
rs149228586	1e-06	41608058	3657	0.3864	0.07888	T	C	0.0286	BAFF-R on CD24+ CD27+	TRUE	reported	textfile
rs2142827	4.12e-21	42874781	3657	-0.3402	0.03585	A	G	0.1416	BAFF-R on CD24+ CD27+	TRUE	reported	textfile
rs143944768	4.03e-09	44378670	3657	-0.3468	0.0588	T	C	0.0463	BAFF-R on CD24+ CD27+	TRUE	reported	textfile
rs6680891	6.31e-06	164083691	3657	0.1376	0.03043	T	A	0.2122	BAFF-R on IgD- CD24-	TRUE	reported	textfile
rs4657041	4.18e-08	161478859	3657	-0.1479	0.02692	C	T	0.3344	BAFF-R on IgD- CD24-	TRUE	reported	textfile
rs10169360	6.58e-06	5558511	3657	-0.5775	0.1279	A	G	0.0094	BAFF-R on IgD- CD24-	TRUE	reported	textfile
rs9869373	5.46e-06	101645001	3657	-0.1287	0.02827	T	C	0.2896	BAFF-R on IgD- CD24-	TRUE	reported	textfile
rs7684683	3.86e-06	80423021	3657	-0.1485	0.03211	T	G	0.8188	BAFF-R on IgD- CD24-	TRUE	reported	textfile
rs2939924	3.55e-06	132491701	3657	0.1234	0.02657	T	C	0.3273	BAFF-R on IgD- CD24-	TRUE	reported	textfile
rs2861184	7.97e-06	38422885	3657	0.1526	0.03412	T	C	0.8361	BAFF-R on IgD- CD24-	TRUE	reported	textfile
rs143106266	4.36e-07	29908421	3657	-1.247	0.2463	A	C	0.0025	BAFF-R on IgD- CD24-	TRUE	reported	textfile
rs4467081	5.67e-06	25853127	3657	-0.1151	0.02532	G	A	0.4945	BAFF-R on IgD- CD24-	TRUE	reported	textfile
rs11083093	8.8e-06	22393283	3657	-0.4613	0.1036	A	G	0.0144	BAFF-R on IgD- CD24-	TRUE	reported	textfile
rs528009599	3.54e-16	40568020	3657	-1.005	0.1227	A	G	0.0111	BAFF-R on IgD- CD24-	TRUE	reported	textfile
rs5750432	8.28e-06	22402940	3657	-0.187	0.04188	T	C	0.9054	BAFF-R on IgD- CD24-	TRUE	reported	textfile
rs73165129	1e-200	42315371	3657	-1.427	0.03453	T	C	0.099	BAFF-R on IgD- CD24-	TRUE	reported	textfile
rs9614288	1.2e-22	44297686	3657	-0.2871	0.02912	T	A	0.2346	BAFF-R on IgD- CD24-	TRUE	reported	textfile
rs146069723	2.82e-33	43339331	3657	-0.5779	0.0476	T	C	0.0756	BAFF-R on IgD- CD24-	TRUE	reported	textfile
rs113530150	4.73e-14	40567196	3657	-0.3712	0.04904	T	C	0.0742	BAFF-R on IgD- CD24-	TRUE	reported	textfile
rs142780018	3.41e-08	44395926	3657	-0.3245	0.05867	A	G	0.0463	BAFF-R on IgD- CD24-	TRUE	reported	textfile
rs149398740	2.53e-06	23924845	3657	-1.126	0.2389	T	C	0.0027	BAFF-R on IgD- CD24-	TRUE	reported	textfile
rs150612106	2.74e-20	40175781	3657	-0.7252	0.07811	A	G	0.0261	BAFF-R on IgD- CD24-	TRUE	reported	textfile
rs6000850	3.04e-07	38032090	3657	0.4708	0.09176	C	T	0.9806	BAFF-R on IgD- CD24-	TRUE	reported	textfile
rs13058590	2.1e-09	39641412	3657	-0.355	0.05912	T	C	0.0468	BAFF-R on IgD- CD24-	TRUE	reported	textfile
rs9622984	2.4e-06	39659460	3657	-0.1875	0.0397	A	G	0.1181	BAFF-R on IgD- CD24-	TRUE	reported	textfile
rs5758649	3.89e-40	42605548	3657	-0.6004	0.04473	T	C	0.0871	BAFF-R on IgD- CD24-	TRUE	reported	textfile
rs191405504	1.26e-19	41305796	3657	-0.5316	0.05831	T	A	0.0535	BAFF-R on IgD- CD24-	TRUE	reported	textfile
rs4657041	2.29e-08	161478859	3657	-0.1503	0.02684	C	T	0.3344	BAFF-R on IgD- CD27-	TRUE	reported	textfile
rs72780844	7.28e-06	15727913	3657	-1.712	0.3811	G	A	0.0011	BAFF-R on IgD- CD27-	TRUE	reported	textfile
rs2925323	2.85e-06	101658926	3657	-0.1311	0.02795	T	C	0.2923	BAFF-R on IgD- CD27-	TRUE	reported	textfile
rs2789845	6.3e-06	136799915	3657	-0.2058	0.04551	T	C	0.9215	BAFF-R on IgD- CD27-	TRUE	reported	textfile
rs2939924	5.04e-07	132491701	3657	0.1334	0.02649	T	C	0.3273	BAFF-R on IgD- CD27-	TRUE	reported	textfile
rs2861184	8.31e-06	38422885	3657	0.1519	0.03403	T	C	0.8361	BAFF-R on IgD- CD27-	TRUE	reported	textfile
rs143106266	3.76e-07	29908421	3657	-1.252	0.246	A	C	0.0025	BAFF-R on IgD- CD27-	TRUE	reported	textfile
rs2110699	6.2e-06	89904438	3657	0.1824	0.04029	A	G	0.8961	BAFF-R on IgD- CD27-	TRUE	reported	textfile
rs145423893	1.5e-06	28254280	3657	-0.82	0.1702	C	T	0.0055	BAFF-R on IgD- CD27-	TRUE	reported	textfile
rs142780018	1.63e-08	44395926	3657	-0.3313	0.05854	A	G	0.0463	BAFF-R on IgD- CD27-	TRUE	reported	textfile
rs528009599	4.54e-15	40568020	3657	-0.9649	0.1226	A	G	0.0111	BAFF-R on IgD- CD27-	TRUE	reported	textfile
rs191405504	1.07e-19	41305796	3657	-0.5312	0.05816	T	A	0.0535	BAFF-R on IgD- CD27-	TRUE	reported	textfile
rs73165129	1e-200	42315371	3657	-1.439	0.03429	T	C	0.099	BAFF-R on IgD- CD27-	TRUE	reported	textfile
rs13058590	1.33e-10	39641412	3657	-0.3797	0.05894	T	C	0.0468	BAFF-R on IgD- CD27-	TRUE	reported	textfile
rs146069723	6.25e-32	43339331	3657	-0.5638	0.04748	T	C	0.0756	BAFF-R on IgD- CD27-	TRUE	reported	textfile
rs5758649	1.63e-37	42605548	3657	-0.5779	0.04464	T	C	0.0871	BAFF-R on IgD- CD27-	TRUE	reported	textfile
rs9614288	8e-23	44297686	3657	-0.2875	0.02904	T	A	0.2346	BAFF-R on IgD- CD27-	TRUE	reported	textfile
rs6000850	8.84e-08	38032090	3657	0.4903	0.09148	C	T	0.9806	BAFF-R on IgD- CD27-	TRUE	reported	textfile
rs113530150	1.4e-14	40567196	3657	-0.3778	0.04889	T	C	0.0742	BAFF-R on IgD- CD27-	TRUE	reported	textfile
rs150612106	2.29e-20	40175781	3657	-0.725	0.07793	A	G	0.0261	BAFF-R on IgD- CD27-	TRUE	reported	textfile
rs4657041	2.4e-07	161478859	3657	-0.1395	0.02696	C	T	0.3344	BAFF-R on IgD- CD38-	TRUE	reported	textfile
rs116470335	4.06e-06	24492147	3657	1.518	0.3289	A	G	0.0016	BAFF-R on IgD- CD38-	TRUE	reported	textfile
rs62567851	8.96e-06	115279319	3657	0.6003	0.135	A	G	0.0086	BAFF-R on IgD- CD38-	TRUE	reported	textfile
rs56020760	6.82e-06	72391681	3657	-0.2358	0.05233	T	C	0.0607	BAFF-R on IgD- CD38-	TRUE	reported	textfile
rs118159778	6.07e-06	15099583	3657	-1.351	0.2982	T	C	0.0021	BAFF-R on IgD- CD38-	TRUE	reported	textfile
rs61879160	9.42e-06	622044	3657	0.1688	0.03805	T	C	0.1303	BAFF-R on IgD- CD38-	TRUE	reported	textfile
rs76400748	8.19e-06	131814009	3657	0.3784	0.08472	A	G	0.0213	BAFF-R on IgD- CD38-	TRUE	reported	textfile
rs143106266	5.18e-07	29908421	3657	-1.237	0.246	A	C	0.0025	BAFF-R on IgD- CD38-	TRUE	reported	textfile
rs2110699	8.28e-06	89904438	3657	0.1804	0.04041	A	G	0.8961	BAFF-R on IgD- CD38-	TRUE	reported	textfile
rs2142827	3.98e-23	42874781	3657	-0.3562	0.03572	A	G	0.1416	BAFF-R on IgD- CD38-	TRUE	reported	textfile
rs73165129	1e-200	42315371	3657	-1.461	0.03414	T	C	0.099	BAFF-R on IgD- CD38-	TRUE	reported	textfile
rs17032	5.8e-08	39130843	3657	0.1449	0.02665	G	C	0.3228	BAFF-R on IgD- CD38-	TRUE	reported	textfile
rs5758649	7.62e-49	42605548	3657	-0.6648	0.04459	T	C	0.0871	BAFF-R on IgD- CD38-	TRUE	reported	textfile
rs528009599	3.76e-19	40568020	3657	-1.101	0.1225	A	G	0.0111	BAFF-R on IgD- CD38-	TRUE	reported	textfile
rs75056525	3.88e-38	43349884	3657	-0.6176	0.04729	A	G	0.0762	BAFF-R on IgD- CD38-	TRUE	reported	textfile
rs117086217	3.73e-13	39876838	3657	-0.4887	0.06701	G	A	0.0343	BAFF-R on IgD- CD38-	TRUE	reported	textfile
rs142780018	1.44e-08	44395926	3657	-0.3333	0.05866	A	G	0.0463	BAFF-R on IgD- CD38-	TRUE	reported	textfile
rs9614288	1.19e-26	44297686	3657	-0.313	0.02906	T	A	0.2346	BAFF-R on IgD- CD38-	TRUE	reported	textfile
rs2479085	2.62e-06	15667443	3659	-0.1772	0.03766	C	T	0.1271	BAFF-R on IgD- CD38br	TRUE	reported	textfile
rs643428	6.91e-06	54728858	3659	0.1106	0.02456	T	C	0.4759	BAFF-R on IgD- CD38br	TRUE	reported	textfile
rs17828306	2.37e-06	62162828	3659	0.1256	0.02658	G	A	0.315	BAFF-R on IgD- CD38br	TRUE	reported	textfile
rs10071113	9.12e-06	178512644	3659	0.1861	0.04188	A	G	0.0925	BAFF-R on IgD- CD38br	TRUE	reported	textfile
rs73269620	1.74e-06	13273064	3659	-0.1197	0.025	C	T	0.3773	BAFF-R on IgD- CD38br	TRUE	reported	textfile
rs147645513	5.09e-06	32376606	3659	-0.4405	0.09644	T	C	0.0172	BAFF-R on IgD- CD38br	TRUE	reported	textfile
rs66717547	5.2e-06	122963696	3659	0.5147	0.1128	A	G	0.0118	BAFF-R on IgD- CD38br	TRUE	reported	textfile
rs79868028	8.44e-06	133645848	3659	0.1897	0.04254	A	G	0.0935	BAFF-R on IgD- CD38br	TRUE	reported	textfile
rs17878304	4.98e-06	4956161	3659	-0.3061	0.06694	T	C	0.0343	BAFF-R on IgD- CD38br	TRUE	reported	textfile
rs561920	4.49e-06	922125	3659	0.1358	0.02955	C	T	0.221	BAFF-R on IgD- CD38br	TRUE	reported	textfile
rs146069723	8.99e-07	43339331	3659	-0.2315	0.04704	T	C	0.0756	BAFF-R on IgD- CD38br	TRUE	reported	textfile
rs139784925	3.23e-06	41079533	3659	-0.2552	0.05474	T	C	0.0571	BAFF-R on IgD- CD38br	TRUE	reported	textfile
rs4822134	6.78e-09	42867332	3659	0.1467	0.02525	C	T	0.4057	BAFF-R on IgD- CD38br	TRUE	reported	textfile
rs149192849	1.35e-08	42270864	3659	-0.3114	0.0547	C	T	0.0536	BAFF-R on IgD- CD38br	TRUE	reported	textfile
rs73165129	4.96e-38	42315371	3659	-0.5288	0.04055	T	C	0.0991	BAFF-R on IgD- CD38br	TRUE	reported	textfile
rs4657041	1.31e-10	161478859	3657	-0.1739	0.02699	C	T	0.3344	BAFF-R on IgD- CD38dim	TRUE	reported	textfile
rs9434824	7.74e-06	7137637	3657	0.1265	0.02825	G	A	0.7266	BAFF-R on IgD- CD38dim	TRUE	reported	textfile
rs2925323	7.81e-06	101658926	3657	-0.126	0.02815	T	C	0.2923	BAFF-R on IgD- CD38dim	TRUE	reported	textfile
rs116470335	4.93e-06	24492147	3657	1.508	0.3297	A	G	0.0016	BAFF-R on IgD- CD38dim	TRUE	reported	textfile
rs6666916	7.87e-06	86007429	3658	0.2918	0.06521	T	C	0.0387	BAFF-R on IgD+	TRUE	reported	textfile
rs72658947	7.26e-06	30372026	3658	-0.4033	0.08976	C	G	0.0187	BAFF-R on IgD+	TRUE	reported	textfile
rs6680891	3.95e-06	164083691	3658	0.1408	0.03048	T	A	0.2121	BAFF-R on IgD+	TRUE	reported	textfile
rs1801274	3.64e-10	161479745	3658	-0.1694	0.02694	G	A	0.325	BAFF-R on IgD+	TRUE	reported	textfile
rs114318843	7.68e-06	164755835	3658	-0.5034	0.1124	C	T	0.0122	BAFF-R on IgD+	TRUE	reported	textfile
rs149153670	5.9e-06	142280835	3658	-0.5443	0.12	C	T	0.0118	BAFF-R on IgD+	TRUE	reported	textfile
rs2925323	3.03e-06	101658926	3658	-0.1312	0.02806	T	C	0.2922	BAFF-R on IgD+	TRUE	reported	textfile
rs116470335	6.06e-06	24492147	3658	1.488	0.3285	A	G	0.0016	BAFF-R on IgD+	TRUE	reported	textfile
rs1563991	2.82e-06	37670518	3658	0.149	0.03176	T	G	0.8063	BAFF-R on IgD+	TRUE	reported	textfile
rs143106266	2.03e-06	29908421	3658	-1.176	0.2473	A	C	0.0025	BAFF-R on IgD+	TRUE	reported	textfile
rs1609762	5.12e-06	33787438	3658	0.1138	0.02492	T	C	0.493	BAFF-R on IgD+	TRUE	reported	textfile
rs1885397	7.65e-06	55233098	3658	-0.1447	0.0323	C	A	0.1903	BAFF-R on IgD+	TRUE	reported	textfile
rs35754161	9.91e-06	51655048	3658	-0.1127	0.02548	T	G	0.4647	BAFF-R on IgD+	TRUE	reported	textfile
rs148563640	5.07e-06	48145906	3658	0.3914	0.08568	T	C	0.0219	BAFF-R on IgD+	TRUE	reported	textfile
rs76146864	1.11e-19	40246055	3658	-0.7095	0.07772	T	C	0.0264	BAFF-R on IgD+	TRUE	reported	textfile
rs5757678	5.51e-17	39843409	3658	0.218	0.0259	T	C	0.6419	BAFF-R on IgD+	TRUE	reported	textfile
rs73165129	1e-200	42315371	3658	-1.508	0.03368	T	C	0.099	BAFF-R on IgD+	TRUE	reported	textfile
rs1894588	1.87e-24	40629980	3658	-0.5248	0.05105	T	C	0.0622	BAFF-R on IgD+	TRUE	reported	textfile
rs1081003	5.92e-30	42525756	3658	-0.5131	0.04473	A	G	0.0875	BAFF-R on IgD+	TRUE	reported	textfile
rs117705111	3.48e-30	41957510	3658	-0.7498	0.06509	A	G	0.0365	BAFF-R on IgD+	TRUE	reported	textfile
rs117430146	1.83e-08	41998660	3658	0.3144	0.05574	C	G	0.056	BAFF-R on IgD+	TRUE	reported	textfile
rs149806587	1.41e-20	40774205	3658	-0.5364	0.05734	G	A	0.0526	BAFF-R on IgD+	TRUE	reported	textfile
rs5759079	3.06e-33	43393437	3658	-0.4367	0.036	A	G	0.1407	BAFF-R on IgD+	TRUE	reported	textfile
rs149398740	5.04e-06	23924845	3658	-1.094	0.2394	T	C	0.0027	BAFF-R on IgD+	TRUE	reported	textfile
rs1801274	2.29e-11	161479745	3657	-0.1805	0.02691	G	A	0.325	BAFF-R on IgD+ CD24-	TRUE	reported	textfile
rs6680891	4.31e-06	164083691	3657	0.1402	0.03047	T	A	0.2122	BAFF-R on IgD+ CD24-	TRUE	reported	textfile
rs149153670	8.67e-06	142280835	3657	-0.534	0.1199	C	T	0.0118	BAFF-R on IgD+ CD24-	TRUE	reported	textfile
rs2925323	2.68e-06	101658926	3657	-0.1319	0.02806	T	C	0.2923	BAFF-R on IgD+ CD24-	TRUE	reported	textfile
rs116470335	4.54e-06	24492147	3657	1.508	0.3285	A	G	0.0016	BAFF-R on IgD+ CD24-	TRUE	reported	textfile
rs2939924	9.81e-06	132491701	3657	0.1178	0.02661	T	C	0.3273	BAFF-R on IgD+ CD24-	TRUE	reported	textfile
rs4880914	8.73e-06	1746219	3657	-0.1388	0.03116	G	A	0.8043	BAFF-R on IgD+ CD24-	TRUE	reported	textfile
rs1563991	2.72e-06	37670518	3657	0.1491	0.03174	T	G	0.8063	BAFF-R on IgD+ CD24-	TRUE	reported	textfile
rs143106266	1.75e-06	29908421	3657	-1.183	0.247	A	C	0.0025	BAFF-R on IgD+ CD24-	TRUE	reported	textfile
rs35754161	5.59e-06	51655048	3657	-0.1159	0.02548	T	G	0.4649	BAFF-R on IgD+ CD24-	TRUE	reported	textfile
rs145868946	8.19e-06	26045225	3657	-1.37	0.3067	C	T	0.0018	BAFF-R on IgD+ CD24-	TRUE	reported	textfile
rs148563640	2.88e-06	48145906	3657	0.4012	0.0856	T	C	0.0219	BAFF-R on IgD+ CD24-	TRUE	reported	textfile
rs76146864	1.1e-20	40246055	3657	-0.7283	0.07763	T	C	0.0264	BAFF-R on IgD+ CD24-	TRUE	reported	textfile
rs5757678	3.82e-17	39843409	3657	0.2191	0.0259	T	C	0.6418	BAFF-R on IgD+ CD24-	TRUE	reported	textfile
rs149806587	9.77e-21	40774205	3657	-0.5384	0.05731	G	A	0.0526	BAFF-R on IgD+ CD24-	TRUE	reported	textfile
rs149398740	3.14e-06	23924845	3657	-1.117	0.2393	T	C	0.0027	BAFF-R on IgD+ CD24-	TRUE	reported	textfile
rs1894588	3.97e-25	40629980	3657	-0.532	0.051	T	C	0.0622	BAFF-R on IgD+ CD24-	TRUE	reported	textfile
rs1081003	3.32e-28	42525756	3657	-0.4975	0.0448	A	G	0.0874	BAFF-R on IgD+ CD24-	TRUE	reported	textfile
rs117705111	2.97e-31	41957510	3657	-0.763	0.065	A	G	0.0365	BAFF-R on IgD+ CD24-	TRUE	reported	textfile
rs117430146	1.45e-08	41998660	3657	0.3164	0.0557	C	G	0.0561	BAFF-R on IgD+ CD24-	TRUE	reported	textfile
rs5759079	3.27e-32	43393437	3657	-0.4296	0.03601	A	G	0.1406	BAFF-R on IgD+ CD24-	TRUE	reported	textfile
rs73165129	1e-200	42315371	3657	-1.51	0.03363	T	C	0.099	BAFF-R on IgD+ CD24-	TRUE	reported	textfile
rs72658947	7.47e-06	30372026	3657	-0.403	0.08982	C	G	0.0187	BAFF-R on IgD+ CD24+	TRUE	reported	textfile
rs4657041	2.63e-07	161478859	3657	-0.1392	0.02699	C	T	0.3344	BAFF-R on IgD+ CD24+	TRUE	reported	textfile
rs6680891	6.98e-06	164083691	3657	0.1373	0.03051	T	A	0.2122	BAFF-R on IgD+ CD24+	TRUE	reported	textfile
rs74594247	8.76e-06	147057319	3657	0.7561	0.1698	A	G	0.0052	BAFF-R on IgD+ CD24+	TRUE	reported	textfile
rs114318843	8.64e-06	164755835	3657	-0.5009	0.1124	C	T	0.0122	BAFF-R on IgD+ CD24+	TRUE	reported	textfile
rs116470335	2.84e-06	24492147	3657	1.543	0.329	A	G	0.0016	BAFF-R on IgD+ CD24+	TRUE	reported	textfile
rs56020760	3.22e-06	72391681	3657	-0.2447	0.05247	T	C	0.0607	BAFF-R on IgD+ CD24+	TRUE	reported	textfile
rs143106266	3.11e-06	29908421	3657	-1.155	0.2473	A	C	0.0025	BAFF-R on IgD+ CD24+	TRUE	reported	textfile
rs1885397	7.68e-06	55233098	3657	-0.1449	0.03233	C	A	0.1903	BAFF-R on IgD+ CD24+	TRUE	reported	textfile
rs75056525	3.32e-31	43349884	3657	-0.5571	0.0475	A	G	0.0762	BAFF-R on IgD+ CD24+	TRUE	reported	textfile
rs2142827	1.48e-19	42874781	3657	-0.3265	0.03588	A	G	0.1416	BAFF-R on IgD+ CD24+	TRUE	reported	textfile
rs189503542	6.96e-09	44698304	3657	-0.6337	0.1091	A	T	0.0138	BAFF-R on IgD+ CD24+	TRUE	reported	textfile
rs117086217	4.42e-14	39876838	3657	-0.5093	0.06721	G	A	0.0343	BAFF-R on IgD+ CD24+	TRUE	reported	textfile
rs5758649	1.09e-38	42605548	3657	-0.5902	0.04484	T	C	0.0871	BAFF-R on IgD+ CD24+	TRUE	reported	textfile
rs73165129	1e-200	42315371	3657	-1.487	0.03398	T	C	0.099	BAFF-R on IgD+ CD24+	TRUE	reported	textfile
rs149228586	1.42e-06	41608058	3657	0.3809	0.07887	T	C	0.0286	BAFF-R on IgD+ CD24+	TRUE	reported	textfile
rs5996232	6.38e-07	43159810	3657	0.1284	0.02574	T	C	0.4047	BAFF-R on IgD+ CD24+	TRUE	reported	textfile
rs528009599	1.31e-17	40568020	3657	-1.056	0.123	A	G	0.0111	BAFF-R on IgD+ CD24+	TRUE	reported	textfile
rs9614288	5.05e-26	44297686	3657	-0.3097	0.02913	T	A	0.2346	BAFF-R on IgD+ CD24+	TRUE	reported	textfile
rs6680891	5.13e-06	164083691	3645	0.139	0.03044	T	A	0.2122	BAFF-R on IgD+ CD38-	TRUE	reported	textfile
rs1801274	8.91e-07	161479745	3645	-0.1327	0.02696	G	A	0.3254	BAFF-R on IgD+ CD38-	TRUE	reported	textfile
rs2925323	5.11e-06	101658926	3645	-0.128	0.02803	T	C	0.2927	BAFF-R on IgD+ CD38-	TRUE	reported	textfile
rs116470335	1.26e-06	24492147	3645	1.591	0.3278	A	G	0.0016	BAFF-R on IgD+ CD38-	TRUE	reported	textfile
rs448333	7.01e-06	97236851	3645	-0.1463	0.03251	C	T	0.8091	BAFF-R on IgD+ CD38-	TRUE	reported	textfile
rs190757416	9.36e-06	45358923	3645	0.6409	0.1444	G	A	0.0069	BAFF-R on IgD+ CD38-	TRUE	reported	textfile
rs2519807	5.13e-06	136826108	3645	-0.1252	0.02741	C	T	0.6986	BAFF-R on IgD+ CD38-	TRUE	reported	textfile
rs137911637	6.02e-06	25305421	3645	0.3331	0.0735	G	A	0.032	BAFF-R on IgD+ CD38-	TRUE	reported	textfile
rs56020760	9.1e-06	72391681	3645	-0.2324	0.0523	T	C	0.0609	BAFF-R on IgD+ CD38-	TRUE	reported	textfile
rs2939924	2.07e-06	132491701	3645	0.1263	0.02656	T	C	0.328	BAFF-R on IgD+ CD38-	TRUE	reported	textfile
rs1563991	7.44e-06	37670518	3645	0.1422	0.03169	T	G	0.8059	BAFF-R on IgD+ CD38-	TRUE	reported	textfile
rs143106266	2.39e-06	29908421	3645	-1.163	0.2462	A	C	0.0025	BAFF-R on IgD+ CD38-	TRUE	reported	textfile
rs2110699	5.82e-06	89904438	3645	0.1836	0.04044	A	G	0.8962	BAFF-R on IgD+ CD38-	TRUE	reported	textfile
rs1894588	2.15e-23	40629980	3645	-0.5121	0.05103	T	C	0.0621	BAFF-R on IgD+ CD38-	TRUE	reported	textfile
rs149806587	1.61e-20	40774205	3645	-0.5355	0.05733	G	A	0.0527	BAFF-R on IgD+ CD38-	TRUE	reported	textfile
rs117430146	1.65e-08	41998660	3645	0.3149	0.05565	C	G	0.0562	BAFF-R on IgD+ CD38-	TRUE	reported	textfile
rs76146864	6.86e-19	40246055	3645	-0.6949	0.07785	T	C	0.0263	BAFF-R on IgD+ CD38-	TRUE	reported	textfile
rs117705111	3e-29	41957510	3645	-0.7379	0.06516	A	G	0.0364	BAFF-R on IgD+ CD38-	TRUE	reported	textfile
rs1081003	4.59e-33	42525756	3645	-0.5412	0.04473	A	G	0.0872	BAFF-R on IgD+ CD38-	TRUE	reported	textfile
rs5757678	5.47e-16	39843409	3645	0.2107	0.02589	T	C	0.6417	BAFF-R on IgD+ CD38-	TRUE	reported	textfile
rs5759079	5.11e-35	43393437	3645	-0.4487	0.03597	A	G	0.1407	BAFF-R on IgD+ CD38-	TRUE	reported	textfile
rs73165129	1e-200	42315371	3645	-1.496	0.03378	T	C	0.0989	BAFF-R on IgD+ CD38-	TRUE	reported	textfile
rs2570487	7.35e-06	104459443	1837	-0.6437	0.1432	A	T	0.9858	BAFF-R on IgD+ CD38- naive	TRUE	reported	textfile
rs59598877	7.81e-06	196505282	1837	0.2314	0.05161	G	T	0.1257	BAFF-R on IgD+ CD38- naive	TRUE	reported	textfile
rs6804241	8.26e-06	61516583	1837	-0.2297	0.05138	G	A	0.8737	BAFF-R on IgD+ CD38- naive	TRUE	reported	textfile
rs9815713	3.88e-06	153568131	1837	0.2446	0.0528	G	A	0.1173	BAFF-R on IgD+ CD38- naive	TRUE	reported	textfile
rs10155189	5.43e-06	38927396	1837	0.1673	0.03668	C	T	0.6696	BAFF-R on IgD+ CD38- naive	TRUE	reported	textfile
rs55846026	8.25e-06	130179421	1837	0.3233	0.07231	C	T	0.0607	BAFF-R on IgD+ CD38- naive	TRUE	reported	textfile
rs57736830	6.67e-07	168402085	1837	-0.2285	0.04582	G	C	0.1644	BAFF-R on IgD+ CD38- naive	TRUE	reported	textfile
rs1368364	7.31e-06	146926845	1837	-0.1536	0.03415	G	C	0.5544	BAFF-R on IgD+ CD38- naive	TRUE	reported	textfile
rs17596501	5.08e-06	1557372	1837	0.162	0.03541	A	G	0.3606	BAFF-R on IgD+ CD38- naive	TRUE	reported	textfile
rs73451452	8.49e-07	137804100	1837	0.4597	0.09304	A	T	0.0362	BAFF-R on IgD+ CD38- naive	TRUE	reported	textfile
rs115650989	1.99e-06	145510474	1837	-0.4764	0.09988	A	G	0.0299	BAFF-R on IgD+ CD38- naive	TRUE	reported	textfile
rs75589560	4.69e-06	129239338	1837	0.3871	0.08431	G	C	0.0441	BAFF-R on IgD+ CD38- naive	TRUE	reported	textfile
rs150624416	8.16e-06	57677034	1837	0.4537	0.1014	A	G	0.0294	BAFF-R on IgD+ CD38- naive	TRUE	reported	textfile
rs11599977	1.84e-06	38419307	1837	0.196	0.04096	A	G	0.7787	BAFF-R on IgD+ CD38- naive	TRUE	reported	textfile
rs79451942	2.7e-06	109330334	1837	-0.5787	0.1229	T	G	0.0193	BAFF-R on IgD+ CD38- naive	TRUE	reported	textfile
rs139758246	5.19e-06	1227020	1837	-0.6514	0.1425	C	T	0.0152	BAFF-R on IgD+ CD38- naive	TRUE	reported	textfile
rs9896701	9.11e-06	68048182	1837	0.159	0.03572	G	A	0.3481	BAFF-R on IgD+ CD38- naive	TRUE	reported	textfile
rs7504122	7.98e-06	10226551	1837	-0.1806	0.04032	T	C	0.2548	BAFF-R on IgD+ CD38- naive	TRUE	reported	textfile
rs35291683	7.34e-08	42576275	1837	0.2993	0.05538	A	G	0.107	BAFF-R on IgD+ CD38- naive	TRUE	reported	textfile
rs147730115	4.84e-06	26858465	1837	1.122	0.2447	A	C	0.0046	BAFF-R on IgD+ CD38- naive	TRUE	reported	textfile
rs6002543	9.1e-184	42320547	1837	-1.52	0.0467	G	C	0.0947	BAFF-R on IgD+ CD38- naive	TRUE	reported	textfile
rs1894588	9.72e-18	40629980	1837	-0.607	0.07005	T	C	0.061	BAFF-R on IgD+ CD38- naive	TRUE	reported	textfile
rs76146864	1.74e-11	40246055	1837	-0.7454	0.1101	T	C	0.025	BAFF-R on IgD+ CD38- naive	TRUE	reported	textfile
rs149806587	3.18e-10	40774205	1837	-0.5047	0.07979	G	A	0.0517	BAFF-R on IgD+ CD38- naive	TRUE	reported	textfile
rs117705111	1.25e-14	41957510	1837	-0.7129	0.09169	A	G	0.0346	BAFF-R on IgD+ CD38- naive	TRUE	reported	textfile
rs5757678	2.82e-10	39843409	1837	0.2286	0.03604	T	C	0.6486	BAFF-R on IgD+ CD38- naive	TRUE	reported	textfile
rs117430146	9.89e-06	41998660	1837	0.3597	0.08117	C	G	0.0487	BAFF-R on IgD+ CD38- naive	TRUE	reported	textfile
rs1081003	8.86e-18	42525756	1837	-0.5202	0.05995	A	G	0.0887	BAFF-R on IgD+ CD38- naive	TRUE	reported	textfile
rs2018340	7.45e-21	43390319	1837	-0.472	0.04978	A	G	0.1375	BAFF-R on IgD+ CD38- naive	TRUE	reported	textfile
rs4689407	8.43e-06	6341740	1837	-0.1717	0.03845	G	T	0.7357	BAFF-R on IgD+ CD38- unsw mem	TRUE	reported	textfile
rs57736830	2.91e-07	168402085	1837	-0.2361	0.04586	G	C	0.1644	BAFF-R on IgD+ CD38- unsw mem	TRUE	reported	textfile
rs73451452	8.13e-06	137804100	1837	0.4173	0.09326	A	T	0.0362	BAFF-R on IgD+ CD38- unsw mem	TRUE	reported	textfile
rs115650989	4.76e-07	145510474	1837	-0.5049	0.09989	A	G	0.0299	BAFF-R on IgD+ CD38- unsw mem	TRUE	reported	textfile
rs79451942	2.11e-06	109330334	1837	-0.5854	0.123	T	G	0.0193	BAFF-R on IgD+ CD38- unsw mem	TRUE	reported	textfile
rs80241990	5.43e-06	3250248	1837	-0.368	0.08069	C	A	0.0476	BAFF-R on IgD+ CD38- unsw mem	TRUE	reported	textfile
rs11599977	1.66e-07	38419307	1837	0.2152	0.04096	A	G	0.7787	BAFF-R on IgD+ CD38- unsw mem	TRUE	reported	textfile
rs117397694	1.29e-06	5565515	1837	-0.6104	0.1256	A	C	0.0188	BAFF-R on IgD+ CD38- unsw mem	TRUE	reported	textfile
rs113973452	9.22e-06	100402055	1837	-1.373	0.3088	A	G	0.0033	BAFF-R on IgD+ CD38- unsw mem	TRUE	reported	textfile
rs7504122	2.55e-06	10226551	1837	-0.1904	0.04034	T	C	0.2548	BAFF-R on IgD+ CD38- unsw mem	TRUE	reported	textfile
rs35291683	3.29e-06	42576275	1837	0.2592	0.05555	A	G	0.107	BAFF-R on IgD+ CD38- unsw mem	TRUE	reported	textfile
rs147730115	6.7e-06	26858465	1837	1.106	0.2449	A	C	0.0046	BAFF-R on IgD+ CD38- unsw mem	TRUE	reported	textfile
rs139290596	8.25e-09	44349795	1837	-0.4589	0.07926	G	A	0.0482	BAFF-R on IgD+ CD38- unsw mem	TRUE	reported	textfile
rs5758649	1.02e-24	42605548	1837	-0.6208	0.05961	T	C	0.0887	BAFF-R on IgD+ CD38- unsw mem	TRUE	reported	textfile
rs113530150	8.16e-10	40567196	1837	-0.3995	0.06471	T	C	0.0806	BAFF-R on IgD+ CD38- unsw mem	TRUE	reported	textfile
rs146069723	6.78e-18	43339331	1837	-0.5625	0.06459	T	C	0.0762	BAFF-R on IgD+ CD38- unsw mem	TRUE	reported	textfile
rs150612106	4.23e-10	40175781	1837	-0.6961	0.1109	A	G	0.025	BAFF-R on IgD+ CD38- unsw mem	TRUE	reported	textfile
rs73165129	9.84e-175	42315371	1837	-1.495	0.04742	T	C	0.0944	BAFF-R on IgD+ CD38- unsw mem	TRUE	reported	textfile
rs11090614	8.45e-15	44300847	1837	-0.3049	0.03896	G	A	0.2474	BAFF-R on IgD+ CD38- unsw mem	TRUE	reported	textfile
rs187315152	3.82e-10	41305795	1837	-0.5226	0.083	T	A	0.0501	BAFF-R on IgD+ CD38- unsw mem	TRUE	reported	textfile
rs117826659	1.97e-06	39919408	1837	-0.9788	0.2051	A	G	0.0065	BAFF-R on IgD+ CD38- unsw mem	TRUE	reported	textfile
rs74594247	4.86e-06	147057319	3656	0.7785	0.1701	A	G	0.0052	BAFF-R on IgD+ CD38br	TRUE	reported	textfile
rs4657041	1.93e-08	161478859	3656	-0.1522	0.02702	C	T	0.3342	BAFF-R on IgD+ CD38br	TRUE	reported	textfile
rs72658947	2.15e-06	30372026	3656	-0.4269	0.08994	C	G	0.0187	BAFF-R on IgD+ CD38br	TRUE	reported	textfile
rs114318843	3.32e-06	164755835	3656	-0.5242	0.1126	C	T	0.0122	BAFF-R on IgD+ CD38br	TRUE	reported	textfile
rs141130967	6.69e-07	101706582	3656	-0.3241	0.06509	G	T	0.0417	BAFF-R on IgD+ CD38br	TRUE	reported	textfile
rs116023377	7.96e-06	18858102	3656	-0.6968	0.1558	C	G	0.0066	BAFF-R on IgD+ CD38br	TRUE	reported	textfile
rs35631270	5.89e-06	80524348	3656	-0.1483	0.03269	G	A	0.8237	BAFF-R on IgD+ CD38br	TRUE	reported	textfile
rs34006338	6.96e-06	45957318	3656	-0.8924	0.1982	A	G	0.0037	BAFF-R on IgD+ CD38br	TRUE	reported	textfile
rs11761810	8.89e-06	152779596	3656	0.1125	0.02529	A	C	0.5269	BAFF-R on IgD+ CD38br	TRUE	reported	textfile
rs10273088	9.53e-06	13005993	3656	-0.2113	0.04767	G	A	0.0748	BAFF-R on IgD+ CD38br	TRUE	reported	textfile
rs116897208	3.79e-06	15100608	3656	-1.261	0.2724	C	T	0.0022	BAFF-R on IgD+ CD38br	TRUE	reported	textfile
rs72805400	7.33e-06	77064133	3656	0.2232	0.04971	C	G	0.071	BAFF-R on IgD+ CD38br	TRUE	reported	textfile
rs1563991	9.9e-06	37670518	3656	0.1408	0.03182	T	G	0.8062	BAFF-R on IgD+ CD38br	TRUE	reported	textfile
rs143106266	4.94e-06	29908421	3656	-1.135	0.2481	A	C	0.0025	BAFF-R on IgD+ CD38br	TRUE	reported	textfile
rs72686437	1.3e-06	22596030	3656	0.1999	0.04123	A	G	0.1079	BAFF-R on IgD+ CD38br	TRUE	reported	textfile
rs16957279	4.4e-06	33954227	3656	0.1238	0.02691	G	A	0.3223	BAFF-R on IgD+ CD38br	TRUE	reported	textfile
rs148563640	2.33e-07	48145906	3656	0.4447	0.08584	T	C	0.0219	BAFF-R on IgD+ CD38br	TRUE	reported	textfile
rs117499379	1.65e-06	4343023	3656	0.2411	0.05023	C	T	0.0682	BAFF-R on IgD+ CD38br	TRUE	reported	textfile
rs5757678	7.67e-18	39843409	3656	0.2246	0.02597	T	C	0.6418	BAFF-R on IgD+ CD38br	TRUE	reported	textfile
rs5759079	6.31e-32	43393437	3656	-0.4284	0.03608	A	G	0.1406	BAFF-R on IgD+ CD38br	TRUE	reported	textfile
rs117430146	1.2e-09	41998660	3656	0.3402	0.0558	C	G	0.0561	BAFF-R on IgD+ CD38br	TRUE	reported	textfile
rs73165129	1e-200	42315371	3656	-1.444	0.03455	T	C	0.099	BAFF-R on IgD+ CD38br	TRUE	reported	textfile
rs1894588	1.95e-23	40629980	3656	-0.5142	0.05119	T	C	0.0622	BAFF-R on IgD+ CD38br	TRUE	reported	textfile
rs149806587	7.25e-17	40774205	3656	-0.4826	0.05757	G	A	0.0527	BAFF-R on IgD+ CD38br	TRUE	reported	textfile
rs76146864	3.77e-19	40246055	3656	-0.7005	0.0779	T	C	0.0264	BAFF-R on IgD+ CD38br	TRUE	reported	textfile
rs117705111	3.37e-29	41957510	3656	-0.7389	0.0653	A	G	0.0365	BAFF-R on IgD+ CD38br	TRUE	reported	textfile
rs1081003	1.4e-27	42525756	3656	-0.4922	0.04486	A	G	0.0874	BAFF-R on IgD+ CD38br	TRUE	reported	textfile
rs6680891	9.25e-06	164083691	3657	0.1354	0.03049	T	A	0.2122	BAFF-R on IgD+ CD38dim	TRUE	reported	textfile
rs1801274	6.47e-11	161479745	3657	-0.1765	0.02694	G	A	0.325	BAFF-R on IgD+ CD38dim	TRUE	reported	textfile
rs72658947	2.12e-06	30372026	3657	-0.4262	0.08974	C	G	0.0187	BAFF-R on IgD+ CD38dim	TRUE	reported	textfile
rs9434824	8.86e-06	7137637	3657	0.1254	0.02818	G	A	0.7266	BAFF-R on IgD+ CD38dim	TRUE	reported	textfile
rs2925323	2.79e-06	101658926	3657	-0.1318	0.02808	T	C	0.2923	BAFF-R on IgD+ CD38dim	TRUE	reported	textfile
rs148695055	7.37e-06	137058391	3657	1.887	0.4203	A	G	0.001	BAFF-R on IgD+ CD38dim	TRUE	reported	textfile
rs116470335	4.32e-06	24492147	3657	1.513	0.3287	A	G	0.0016	BAFF-R on IgD+ CD38dim	TRUE	reported	textfile
rs73737980	7.68e-06	33025017	3657	0.5444	0.1215	C	T	0.0109	BAFF-R on IgD+ CD38dim	TRUE	reported	textfile
rs12535011	8.27e-06	33667945	3657	0.7921	0.1774	C	T	0.0048	BAFF-R on IgD+ CD38dim	TRUE	reported	textfile
rs1563991	1.57e-06	37670518	3657	0.1527	0.03176	T	G	0.8063	BAFF-R on IgD+ CD38dim	TRUE	reported	textfile
rs144136349	5.62e-06	34499243	3657	2.591	0.5698	T	C	0.0004	BAFF-R on IgD+ CD38dim	TRUE	reported	textfile
rs143106266	6.96e-07	29908421	3657	-1.229	0.2472	A	C	0.0025	BAFF-R on IgD+ CD38dim	TRUE	reported	textfile
rs35754161	8.39e-06	51655048	3657	-0.1137	0.02549	T	G	0.4649	BAFF-R on IgD+ CD38dim	TRUE	reported	textfile
rs148563640	3.81e-06	48145906	3657	0.3965	0.08567	T	C	0.0219	BAFF-R on IgD+ CD38dim	TRUE	reported	textfile
rs6079871	2.36e-06	15504410	3657	-0.2411	0.05099	T	C	0.0639	BAFF-R on IgD+ CD38dim	TRUE	reported	textfile
rs149398740	6.96e-06	23924845	3657	-1.078	0.2395	T	C	0.0027	BAFF-R on IgD+ CD38dim	TRUE	reported	textfile
rs117430146	3.72e-09	41998660	3657	0.3293	0.05572	C	G	0.0561	BAFF-R on IgD+ CD38dim	TRUE	reported	textfile
rs1894588	5.44e-25	40629980	3657	-0.5308	0.05104	T	C	0.0622	BAFF-R on IgD+ CD38dim	TRUE	reported	textfile
rs76146864	5.94e-20	40246055	3657	-0.7149	0.07772	T	C	0.0264	BAFF-R on IgD+ CD38dim	TRUE	reported	textfile
rs149806587	1.44e-19	40774205	3657	-0.5223	0.05739	G	A	0.0526	BAFF-R on IgD+ CD38dim	TRUE	reported	textfile
rs5759079	4.86e-33	43393437	3657	-0.4356	0.03602	A	G	0.1406	BAFF-R on IgD+ CD38dim	TRUE	reported	textfile
rs5757678	5.08e-17	39843409	3657	0.2184	0.02591	T	C	0.6418	BAFF-R on IgD+ CD38dim	TRUE	reported	textfile
rs117705111	3.09e-30	41957510	3657	-0.7505	0.06509	A	G	0.0365	BAFF-R on IgD+ CD38dim	TRUE	reported	textfile
rs73165129	1e-200	42315371	3657	-1.516	0.03358	T	C	0.099	BAFF-R on IgD+ CD38dim	TRUE	reported	textfile
rs1081003	9.61e-29	42525756	3657	-0.5028	0.04481	A	G	0.0874	BAFF-R on IgD+ CD38dim	TRUE	reported	textfile
rs1801274	1.39e-07	161479745	3657	-0.1424	0.02699	G	A	0.325	BAFF-R on memory B cell	TRUE	reported	textfile
rs72658947	8.87e-06	30372026	3657	-0.3992	0.08971	C	G	0.0187	BAFF-R on memory B cell	TRUE	reported	textfile
rs6680891	4.67e-06	164083691	3657	0.1397	0.03047	T	A	0.2122	BAFF-R on memory B cell	TRUE	reported	textfile
rs2925323	5.75e-06	101658926	3657	-0.1275	0.02807	T	C	0.2923	BAFF-R on memory B cell	TRUE	reported	textfile
rs116470335	8.86e-07	24492147	3657	1.618	0.3287	A	G	0.0016	BAFF-R on memory B cell	TRUE	reported	textfile
rs56020760	4.12e-06	72391681	3657	-0.2417	0.05241	T	C	0.0607	BAFF-R on memory B cell	TRUE	reported	textfile
rs143106266	8.07e-07	29908421	3657	-1.22	0.2468	A	C	0.0025	BAFF-R on memory B cell	TRUE	reported	textfile
rs13058590	6.49e-10	39641412	3657	-0.3667	0.0592	T	C	0.0468	BAFF-R on memory B cell	TRUE	reported	textfile
rs187315152	1.23e-18	41305795	3657	-0.5177	0.05843	T	A	0.0535	BAFF-R on memory B cell	TRUE	reported	textfile
rs146069723	2.95e-32	43339331	3657	-0.5694	0.04769	T	C	0.0756	BAFF-R on memory B cell	TRUE	reported	textfile
rs189503542	2.9e-09	44698304	3657	-0.6487	0.109	A	T	0.0138	BAFF-R on memory B cell	TRUE	reported	textfile
rs528009599	3.09e-18	40568020	3657	-1.075	0.1228	A	G	0.0111	BAFF-R on memory B cell	TRUE	reported	textfile
rs117086217	5.39e-14	39876838	3657	-0.5069	0.06712	G	A	0.0343	BAFF-R on memory B cell	TRUE	reported	textfile
rs149228586	7.53e-07	41608058	3657	0.3904	0.07877	T	C	0.0286	BAFF-R on memory B cell	TRUE	reported	textfile
rs73165129	1e-200	42315371	3657	-1.488	0.0339	T	C	0.099	BAFF-R on memory B cell	TRUE	reported	textfile
rs5758649	3.37e-40	42605548	3657	-0.6016	0.04478	T	C	0.0871	BAFF-R on memory B cell	TRUE	reported	textfile
rs2142827	1.22e-20	42874781	3657	-0.3357	0.03582	A	G	0.1416	BAFF-R on memory B cell	TRUE	reported	textfile
rs9614288	2.29e-26	44297686	3657	-0.3115	0.02909	T	A	0.2346	BAFF-R on memory B cell	TRUE	reported	textfile
rs6680891	2.3e-06	164083691	3657	0.1445	0.03052	T	A	0.2122	BAFF-R on naive-mature B cell	TRUE	reported	textfile
rs1801274	5.25e-12	161479745	3657	-0.1866	0.02696	G	A	0.325	BAFF-R on naive-mature B cell	TRUE	reported	textfile
rs72658947	4.7e-06	30372026	3657	-0.412	0.08987	C	G	0.0187	BAFF-R on naive-mature B cell	TRUE	reported	textfile
rs149153670	7.4e-06	142280835	3657	-0.539	0.1201	C	T	0.0118	BAFF-R on naive-mature B cell	TRUE	reported	textfile
rs2925323	4.76e-06	101658926	3657	-0.1289	0.02812	T	C	0.2923	BAFF-R on naive-mature B cell	TRUE	reported	textfile
rs116470335	5.44e-06	24492147	3657	1.5	0.3294	A	G	0.0016	BAFF-R on naive-mature B cell	TRUE	reported	textfile
rs12529650	6.55e-06	1751206	3657	0.1188	0.02631	T	G	0.3253	BAFF-R on naive-mature B cell	TRUE	reported	textfile
rs56020760	9.3e-06	72391681	3657	-0.2331	0.05252	T	C	0.0607	BAFF-R on naive-mature B cell	TRUE	reported	textfile
rs1563991	2.24e-06	37670518	3657	0.1507	0.03181	T	G	0.8063	BAFF-R on naive-mature B cell	TRUE	reported	textfile
rs143106266	1.39e-06	29908421	3657	-1.196	0.2474	A	C	0.0025	BAFF-R on naive-mature B cell	TRUE	reported	textfile
rs35226928	9.46e-06	33787067	3657	0.509	0.1148	A	C	0.0129	BAFF-R on naive-mature B cell	TRUE	reported	textfile
rs148563640	4.45e-06	48145906	3657	0.3942	0.08577	T	C	0.0219	BAFF-R on naive-mature B cell	TRUE	reported	textfile
rs116674320	7.41e-06	33884065	3657	0.2548	0.05676	A	G	0.0509	BAFF-R on naive-mature B cell	TRUE	reported	textfile
rs149398740	3.74e-06	23924845	3657	-1.111	0.2398	T	C	0.0027	BAFF-R on naive-mature B cell	TRUE	reported	textfile
rs1081003	1.22e-28	42525756	3657	-0.5029	0.04491	A	G	0.0874	BAFF-R on naive-mature B cell	TRUE	reported	textfile
rs76146864	1.78e-20	40246055	3657	-0.7259	0.0778	T	C	0.0264	BAFF-R on naive-mature B cell	TRUE	reported	textfile
rs1894588	2.84e-24	40629980	3657	-0.5235	0.05113	T	C	0.0622	BAFF-R on naive-mature B cell	TRUE	reported	textfile
rs117430146	4.73e-08	41998660	3657	0.3056	0.05584	C	G	0.0561	BAFF-R on naive-mature B cell	TRUE	reported	textfile
rs149806587	1.09e-19	40774205	3657	-0.5248	0.05747	G	A	0.0526	BAFF-R on naive-mature B cell	TRUE	reported	textfile
rs117705111	2.27e-30	41957510	3657	-0.7531	0.06516	A	G	0.0365	BAFF-R on naive-mature B cell	TRUE	reported	textfile
rs5759079	1.22e-32	43393437	3657	-0.4336	0.03609	A	G	0.1406	BAFF-R on naive-mature B cell	TRUE	reported	textfile
rs5757678	1.16e-16	39843409	3657	0.2161	0.02596	T	C	0.6418	BAFF-R on naive-mature B cell	TRUE	reported	textfile
rs73165129	1e-200	42315371	3657	-1.5	0.03386	T	C	0.099	BAFF-R on naive-mature B cell	TRUE	reported	textfile
rs4657041	1.93e-08	161478859	3657	-0.1521	0.02702	C	T	0.3344	BAFF-R on sw mem	TRUE	reported	textfile
rs9869373	4.31e-06	101645001	3657	-0.1306	0.02837	T	C	0.2896	BAFF-R on sw mem	TRUE	reported	textfile
rs116470335	7.2e-06	24492147	3657	1.482	0.3297	A	G	0.0016	BAFF-R on sw mem	TRUE	reported	textfile
rs10243011	8.8e-06	121282913	3657	0.1683	0.03781	C	T	0.1272	BAFF-R on sw mem	TRUE	reported	textfile
rs116897208	9.65e-06	15100608	3657	-1.208	0.2725	C	T	0.0022	BAFF-R on sw mem	TRUE	reported	textfile
rs76400748	7.54e-06	131814009	3657	0.3817	0.08512	A	G	0.0213	BAFF-R on sw mem	TRUE	reported	textfile
rs143106266	7.95e-07	29908421	3657	-1.223	0.2472	A	C	0.0025	BAFF-R on sw mem	TRUE	reported	textfile
rs2142827	2.13e-22	42874781	3657	-0.3514	0.03586	A	G	0.1416	BAFF-R on sw mem	TRUE	reported	textfile
rs143944768	1.41e-08	44378670	3657	-0.3347	0.05887	T	C	0.0463	BAFF-R on sw mem	TRUE	reported	textfile
rs149228586	7.8e-07	41608058	3657	0.3907	0.07895	T	C	0.0286	BAFF-R on sw mem	TRUE	reported	textfile
rs9614288	7.08e-26	44297686	3657	-0.3092	0.02917	T	A	0.2346	BAFF-R on sw mem	TRUE	reported	textfile
rs5758649	4.41e-45	42605548	3657	-0.6396	0.04477	T	C	0.0871	BAFF-R on sw mem	TRUE	reported	textfile
rs146069723	1.54e-34	43339331	3657	-0.5915	0.04776	T	C	0.0756	BAFF-R on sw mem	TRUE	reported	textfile
rs117086217	4.34e-13	39876838	3657	-0.4893	0.06729	G	A	0.0343	BAFF-R on sw mem	TRUE	reported	textfile
rs528009599	1.6e-18	40568020	3657	-1.086	0.123	A	G	0.0111	BAFF-R on sw mem	TRUE	reported	textfile
rs187315152	3.1e-18	41305795	3657	-0.5129	0.05859	T	A	0.0535	BAFF-R on sw mem	TRUE	reported	textfile
rs73165129	1e-200	42315371	3657	-1.466	0.03427	T	C	0.099	BAFF-R on sw mem	TRUE	reported	textfile
rs149398740	7.57e-06	23924845	3657	-1.076	0.2399	T	C	0.0027	BAFF-R on sw mem	TRUE	reported	textfile
rs185794015	5.33e-07	44440180	3657	-0.3915	0.07793	C	T	0.0264	BAFF-R on sw mem	TRUE	reported	textfile
rs13058590	6.66e-10	39641412	3657	-0.3673	0.05933	T	C	0.0468	BAFF-R on sw mem	TRUE	reported	textfile
rs1801274	3.25e-07	161479745	3655	-0.1385	0.02706	G	A	0.3246	BAFF-R on transitional	TRUE	reported	textfile
rs114318843	1.64e-06	164755835	3655	-0.5407	0.1126	C	T	0.0122	BAFF-R on transitional	TRUE	reported	textfile
rs141130967	1.36e-07	101706582	3655	-0.3436	0.06507	G	T	0.0417	BAFF-R on transitional	TRUE	reported	textfile
rs116023377	2.46e-06	18858102	3655	-0.7362	0.156	C	G	0.0066	BAFF-R on transitional	TRUE	reported	textfile
rs57756059	6.88e-06	77500796	3655	0.1172	0.02602	G	A	0.6057	BAFF-R on transitional	TRUE	reported	textfile
rs4252435	9.11e-06	142622714	3655	-0.1875	0.0422	A	G	0.0989	BAFF-R on transitional	TRUE	reported	textfile
rs11761810	7.59e-06	152779596	3655	0.1135	0.02532	A	C	0.5269	BAFF-R on transitional	TRUE	reported	textfile
rs34006338	2.23e-06	45957318	3655	-0.9403	0.1984	A	G	0.0037	BAFF-R on transitional	TRUE	reported	textfile
rs6998646	5.62e-06	127759740	3655	0.1784	0.03924	G	T	0.1189	BAFF-R on transitional	TRUE	reported	textfile
rs77803489	5.42e-06	14893495	3655	-1.264	0.2774	A	G	0.0022	BAFF-R on transitional	TRUE	reported	textfile
rs1563991	1.02e-06	37670518	3655	0.1557	0.03181	T	G	0.8062	BAFF-R on transitional	TRUE	reported	textfile
rs143106266	2.53e-06	29908421	3655	-1.171	0.2485	A	C	0.0025	BAFF-R on transitional	TRUE	reported	textfile
rs56172578	6.49e-06	22597739	3655	0.1848	0.04092	A	G	0.1096	BAFF-R on transitional	TRUE	reported	textfile
rs16957279	8.64e-06	33954227	3655	0.12	0.02693	G	A	0.3224	BAFF-R on transitional	TRUE	reported	textfile
rs148563640	2.33e-06	48145906	3655	0.4066	0.08597	T	C	0.0219	BAFF-R on transitional	TRUE	reported	textfile
rs117499379	1.05e-06	4343023	3655	0.2459	0.05026	C	T	0.0683	BAFF-R on transitional	TRUE	reported	textfile
rs1081003	1.86e-25	42525756	3655	-0.4717	0.0449	A	G	0.0873	BAFF-R on transitional	TRUE	reported	textfile
rs5759079	1.32e-28	43393437	3655	-0.4046	0.03616	A	G	0.1406	BAFF-R on transitional	TRUE	reported	textfile
rs1894588	7.95e-21	40629980	3655	-0.4832	0.05131	T	C	0.0622	BAFF-R on transitional	TRUE	reported	textfile
rs117705111	2.04e-24	41957510	3655	-0.6734	0.06556	A	G	0.0365	BAFF-R on transitional	TRUE	reported	textfile
rs76146864	1.94e-17	40246055	3655	-0.6664	0.07803	T	C	0.0264	BAFF-R on transitional	TRUE	reported	textfile
rs5757678	5.84e-16	39843409	3655	0.2113	0.026	T	C	0.6419	BAFF-R on transitional	TRUE	reported	textfile
rs117430146	3.45e-07	41998660	3655	0.2856	0.05592	C	G	0.0561	BAFF-R on transitional	TRUE	reported	textfile
rs149806587	1.73e-16	40774205	3655	-0.4771	0.05763	G	A	0.0525	BAFF-R on transitional	TRUE	reported	textfile
rs73165129	1e-200	42315371	3655	-1.385	0.03524	T	C	0.099	BAFF-R on transitional	TRUE	reported	textfile
rs1436776	9.01e-06	216235074	3657	0.1135	0.02553	T	C	0.6051	BAFF-R on unsw mem	TRUE	reported	textfile
rs4657041	1.18e-06	161478859	3657	-0.1313	0.02699	C	T	0.3344	BAFF-R on unsw mem	TRUE	reported	textfile
rs6680891	8.2e-06	164083691	3657	0.1361	0.03048	T	A	0.2122	BAFF-R on unsw mem	TRUE	reported	textfile
rs113510401	5.81e-06	51662218	3657	0.5059	0.1114	T	C	0.0124	BAFF-R on unsw mem	TRUE	reported	textfile
rs2925323	5.15e-06	101658926	3657	-0.1282	0.02808	T	C	0.2923	BAFF-R on unsw mem	TRUE	reported	textfile
rs116470335	1.98e-06	24492147	3657	1.566	0.3288	A	G	0.0016	BAFF-R on unsw mem	TRUE	reported	textfile
rs190757416	6.29e-06	45358923	3657	0.6551	0.1448	G	A	0.0068	BAFF-R on unsw mem	TRUE	reported	textfile
rs56020760	6.29e-06	72391681	3657	-0.2371	0.05243	T	C	0.0607	BAFF-R on unsw mem	TRUE	reported	textfile
rs116897208	6.62e-06	15100608	3657	-1.227	0.2719	C	T	0.0022	BAFF-R on unsw mem	TRUE	reported	textfile
rs74643433	9.52e-06	109385593	3657	-0.3816	0.08607	T	C	0.0209	BAFF-R on unsw mem	TRUE	reported	textfile
rs143106266	3.48e-06	29908421	3657	-1.148	0.247	A	C	0.0025	BAFF-R on unsw mem	TRUE	reported	textfile
rs2110699	9.73e-06	89904438	3657	0.1792	0.04047	A	G	0.8961	BAFF-R on unsw mem	TRUE	reported	textfile
rs1885397	2.27e-06	55233098	3657	-0.1529	0.03229	C	A	0.1903	BAFF-R on unsw mem	TRUE	reported	textfile
rs141410339	8.81e-06	40298978	3657	1.578	0.3545	A	G	0.0011	BAFF-R on unsw mem	TRUE	reported	textfile
rs187315152	2.06e-18	41305795	3657	-0.5144	0.05846	T	A	0.0535	BAFF-R on unsw mem	TRUE	reported	textfile
rs149228586	1.8e-06	41608058	3657	0.3769	0.07881	T	C	0.0286	BAFF-R on unsw mem	TRUE	reported	textfile
rs5758649	3.18e-40	42605548	3657	-0.6019	0.04479	T	C	0.0871	BAFF-R on unsw mem	TRUE	reported	textfile
rs146069723	1.58e-31	43339331	3657	-0.5628	0.04773	T	C	0.0756	BAFF-R on unsw mem	TRUE	reported	textfile
rs13058590	9.08e-11	39641412	3657	-0.3847	0.05918	T	C	0.0468	BAFF-R on unsw mem	TRUE	reported	textfile
rs73165129	1e-200	42315371	3657	-1.494	0.03383	T	C	0.099	BAFF-R on unsw mem	TRUE	reported	textfile
rs2142827	5.84e-20	42874781	3657	-0.3298	0.03584	A	G	0.1416	BAFF-R on unsw mem	TRUE	reported	textfile
rs528009599	5.91e-18	40568020	3657	-1.066	0.1228	A	G	0.0111	BAFF-R on unsw mem	TRUE	reported	textfile
rs9614288	1.69e-26	44297686	3657	-0.3124	0.0291	T	A	0.2346	BAFF-R on unsw mem	TRUE	reported	textfile
rs189503542	4.15e-09	44698304	3657	-0.6424	0.109	A	T	0.0138	BAFF-R on unsw mem	TRUE	reported	textfile
rs117086217	1.2e-13	39876838	3657	-0.5	0.06715	G	A	0.0343	BAFF-R on unsw mem	TRUE	reported	textfile
rs664654	9.3e-06	12185036	3656	0.2609	0.05876	A	G	0.0447	CD19 on CD20-	TRUE	reported	textfile
rs536003	6.38e-06	40154898	3656	0.1277	0.02826	A	G	0.2444	CD19 on CD20-	TRUE	reported	textfile
rs13390788	2.6e-06	235624835	3656	0.13	0.02761	G	A	0.2607	CD19 on CD20-	TRUE	reported	textfile
rs7580866	4.25e-06	202479783	3656	0.113	0.02455	C	T	0.4716	CD19 on CD20-	TRUE	reported	textfile
rs111494817	7.47e-06	49120006	3656	-0.205	0.0457	C	T	0.0773	CD19 on CD20-	TRUE	reported	textfile
rs72901497	4.27e-07	115677333	3656	0.1646	0.03249	G	A	0.1727	CD19 on CD20-	TRUE	reported	textfile
rs2098676	9.05e-06	172763674	3656	0.1153	0.02593	T	C	0.6822	CD19 on CD20-	TRUE	reported	textfile
rs183942882	6.17e-07	26009776	3656	-1.714	0.3431	G	A	0.0014	CD19 on CD20-	TRUE	reported	textfile
rs11748905	4.78e-08	80934634	3656	-1.009	0.1845	C	T	0.0048	CD19 on CD20-	TRUE	reported	textfile
rs149522199	9.19e-06	134114882	3656	0.5622	0.1266	A	G	0.0093	CD19 on CD20-	TRUE	reported	textfile
rs55973216	9.52e-06	21380419	3656	-0.2299	0.05185	T	C	0.0579	CD19 on CD20-	TRUE	reported	textfile
rs13429	6.1e-06	440424	3656	0.1093	0.02414	G	A	0.4747	CD19 on CD20-	TRUE	reported	textfile
rs16927639	9.38e-06	62521732	3656	0.1404	0.03164	T	C	0.176	CD19 on CD20-	TRUE	reported	textfile
rs17248848	7.39e-06	107222079	3656	-0.2495	0.05558	A	G	0.0507	CD19 on CD20-	TRUE	reported	textfile
rs1541174	6.56e-06	130287175	3656	-0.1509	0.03343	C	G	0.1571	CD19 on CD20-	TRUE	reported	textfile
rs6583759	6.52e-06	92976570	3656	-0.2738	0.06063	C	A	0.0427	CD19 on CD20-	TRUE	reported	textfile
rs41324346	8.84e-06	89070745	3656	0.1112	0.02499	T	C	0.5598	CD19 on CD20-	TRUE	reported	textfile
rs12318478	5.18e-06	20830424	3656	0.2726	0.05973	T	C	0.0442	CD19 on CD20-	TRUE	reported	textfile
rs997173	4.94e-06	55355033	3656	-0.1819	0.03977	T	C	0.1083	CD19 on CD20-	TRUE	reported	textfile
rs1239945	3.8e-06	51107757	3656	0.1129	0.02439	A	G	0.5341	CD19 on CD20-	TRUE	reported	textfile
rs77441302	7.36e-06	40519517	3656	0.2084	0.04643	T	A	0.0741	CD19 on CD20-	TRUE	reported	textfile
rs164020	2.77e-06	6818628	3656	0.1148	0.02445	T	A	0.42	CD19 on CD20-	TRUE	reported	textfile
rs6658147	7.27e-07	18905298	3595	-0.122	0.02459	G	C	0.543	CD19 on CD20- CD38-	TRUE	reported	textfile
rs11161637	4.96e-06	86021169	3595	-0.1116	0.02439	G	A	0.5694	CD19 on CD20- CD38-	TRUE	reported	textfile
rs41267263	5.48e-06	36335349	3595	0.4339	0.09531	G	T	0.0171	CD19 on CD20- CD38-	TRUE	reported	textfile
rs13391592	1.96e-06	180409011	3595	0.2246	0.04714	A	C	0.0708	CD19 on CD20- CD38-	TRUE	reported	textfile
rs113045391	8.59e-06	201721041	3595	0.1598	0.03586	T	C	0.1346	CD19 on CD20- CD38-	TRUE	reported	textfile
rs78401267	1.48e-06	189064197	3595	0.3318	0.0688	C	T	0.0339	CD19 on CD20- CD38-	TRUE	reported	textfile
rs62290470	7.1e-06	5132403	3595	-0.2329	0.05179	C	G	0.0583	CD19 on CD20- CD38-	TRUE	reported	textfile
rs62413604	4.32e-06	49652991	3595	0.9343	0.203	T	C	0.0035	CD19 on CD20- CD38-	TRUE	reported	textfile
rs9402148	9e-06	129929521	3595	-0.27	0.06072	T	C	0.0419	CD19 on CD20- CD38-	TRUE	reported	textfile
rs116862171	4.97e-06	112145789	3595	-0.3796	0.08302	G	A	0.0218	CD19 on CD20- CD38-	TRUE	reported	textfile
rs17480133	8.5e-06	145783861	3595	-0.1081	0.02425	C	G	0.4975	CD19 on CD20- CD38-	TRUE	reported	textfile
rs150625190	6.49e-06	92727041	3595	-0.5667	0.1255	G	T	0.0095	CD19 on CD20- CD38-	TRUE	reported	textfile
rs72664677	5.65e-06	32638300	3595	-0.1263	0.02777	T	C	0.2576	CD19 on CD20- CD38-	TRUE	reported	textfile
rs75455523	5.04e-06	96941966	3595	-0.4114	0.09002	T	C	0.0197	CD19 on CD20- CD38-	TRUE	reported	textfile
rs12438058	2.06e-06	39819219	3595	0.1624	0.03416	C	T	0.1439	CD19 on CD20- CD38-	TRUE	reported	textfile
rs1966917	1.33e-06	72108055	3595	-0.1981	0.0409	A	G	0.1021	CD19 on CD20- CD38-	TRUE	reported	textfile
rs113932257	2.28e-06	3127438	3595	0.6748	0.1425	C	T	0.0078	CD19 on CD20- CD38-	TRUE	reported	textfile
rs67130681	1.59e-06	71598971	3595	0.1354	0.02816	G	A	0.2465	CD19 on CD20- CD38-	TRUE	reported	textfile
rs10426452	2.51e-08	49907690	3595	-0.1391	0.02491	A	G	0.3815	CD19 on CD20- CD38-	TRUE	reported	textfile
rs7280618	1.22e-06	41565479	3595	-0.3345	0.06882	C	T	0.0334	CD19 on CD20- CD38-	TRUE	reported	textfile
rs219712	1.42e-06	27751176	3595	-0.1463	0.0303	T	C	0.1974	CD19 on CD20- CD38-	TRUE	reported	textfile
rs113004536	3.1e-06	18923443	3595	-0.2154	0.04611	A	G	0.072	CD19 on CD20- CD38-	TRUE	reported	textfile
rs6678796	9.37e-06	247157835	3656	0.2198	0.04953	T	C	0.9368	CD19 on CD24+ CD27+	TRUE	reported	textfile
rs10917581	5.39e-06	162624504	3656	0.1298	0.0285	G	A	0.2533	CD19 on CD24+ CD27+	TRUE	reported	textfile
rs113812519	6.38e-08	207276336	3656	0.4979	0.09189	G	A	0.0185	CD19 on CD24+ CD27+	TRUE	reported	textfile
rs112417310	9.28e-10	206855483	3656	0.5474	0.08918	A	G	0.0201	CD19 on CD24+ CD27+	TRUE	reported	textfile
rs589151	8.16e-06	10567711	3656	-0.1107	0.02478	T	C	0.4599	CD19 on CD24+ CD27+	TRUE	reported	textfile
rs4649079	3.97e-07	25535823	3656	0.2157	0.04246	T	C	0.0961	CD19 on CD24+ CD27+	TRUE	reported	textfile
rs144743804	6.46e-07	207018206	3656	0.4457	0.08939	A	G	0.0197	CD19 on CD24+ CD27+	TRUE	reported	textfile
rs80268044	1.03e-07	43810948	3656	0.1776	0.03331	A	G	0.1766	CD19 on CD24+ CD27+	TRUE	reported	textfile
rs1439005	1.1e-06	61094800	3656	-0.1201	0.0246	C	G	0.4587	CD19 on CD24+ CD27+	TRUE	reported	textfile
rs7665261	3e-06	26464043	3656	-0.7401	0.1582	T	C	0.006	CD19 on CD24+ CD27+	TRUE	reported	textfile
rs281142	4.88e-06	70969845	3656	0.237	0.05178	A	G	0.0598	CD19 on CD24+ CD27+	TRUE	reported	textfile
rs7718237	6.38e-07	173972852	3656	0.1236	0.02478	A	G	0.4837	CD19 on CD24+ CD27+	TRUE	reported	textfile
rs764603	9.64e-08	36793516	3656	0.5734	0.1073	C	A	0.0131	CD19 on CD24+ CD27+	TRUE	reported	textfile
rs35553650	4.62e-06	37456130	3656	-0.3694	0.08052	A	G	0.0245	CD19 on CD24+ CD27+	TRUE	reported	textfile
rs9350187	3.59e-07	19794487	3656	-0.2608	0.05115	T	C	0.0607	CD19 on CD24+ CD27+	TRUE	reported	textfile
rs76162621	7.69e-06	68486690	3656	-1.03	0.2298	G	A	0.0027	CD19 on CD24+ CD27+	TRUE	reported	textfile
rs78007482	1.52e-06	133189482	3656	-0.2189	0.04544	A	T	0.0819	CD19 on CD24+ CD27+	TRUE	reported	textfile
rs12554596	4.96e-06	37002142	3656	-0.1166	0.02549	G	A	0.3892	CD19 on CD24+ CD27+	TRUE	reported	textfile
rs560933055	1.32e-07	1717689	3656	-1.422	0.269	A	T	0.0022	CD19 on CD24+ CD27+	TRUE	reported	textfile
rs17706571	4.19e-06	29271392	3656	0.4536	0.09841	T	C	0.0164	CD19 on CD24+ CD27+	TRUE	reported	textfile
rs149168550	2.25e-06	111354000	3656	0.234	0.04939	G	C	0.0673	CD19 on CD24+ CD27+	TRUE	reported	textfile
rs118134186	4.88e-06	29813364	3656	-1.89	0.4129	C	T	0.0011	CD19 on CD24+ CD27+	TRUE	reported	textfile
rs6575228	1.47e-06	92561395	3656	-0.1199	0.02485	A	G	0.4126	CD19 on CD24+ CD27+	TRUE	reported	textfile
rs138920008	3.15e-11	32422808	3656	-1.443	0.2168	C	G	0.0041	CD19 on CD24+ CD27+	TRUE	reported	textfile
rs11643297	1.45e-09	28973268	3656	0.1545	0.02548	G	A	0.6109	CD19 on CD24+ CD27+	TRUE	reported	textfile
rs1424083	7.28e-06	74304865	3656	-0.1153	0.02568	G	A	0.6537	CD19 on CD24+ CD27+	TRUE	reported	textfile
rs112846834	3.1e-06	7725660	3656	0.249	0.05331	A	C	0.0563	CD19 on CD24+ CD27+	TRUE	reported	textfile
rs72988602	8.73e-07	7114038	3656	0.1815	0.03684	G	A	0.1347	CD19 on CD24+ CD27+	TRUE	reported	textfile
rs2903728	1.94e-06	56408295	3656	-0.1849	0.03879	C	T	0.1146	CD19 on CD24+ CD27+	TRUE	reported	textfile
rs117606004	3.59e-06	44812456	3656	0.6689	0.1441	T	C	0.0071	CD19 on CD24+ CD27+	TRUE	reported	textfile
rs5762000	8.15e-07	27530934	3656	0.1546	0.0313	T	C	0.1854	CD19 on CD24+ CD27+	TRUE	reported	textfile
rs113612962	1.41e-06	43167446	3656	-0.3031	0.06273	C	G	0.0402	CD19 on CD24+ CD27+	TRUE	reported	textfile
rs10192011	5.32e-06	53804261	3655	0.1236	0.02711	T	G	0.29	CD19 on IgD- CD24-	TRUE	reported	textfile
rs10928415	8.56e-06	149553139	3655	0.1356	0.03043	A	G	0.7917	CD19 on IgD- CD24-	TRUE	reported	textfile
rs242172	6.8e-06	60405606	3655	0.58	0.1287	G	T	0.0093	CD19 on IgD- CD24-	TRUE	reported	textfile
rs631691	9.09e-06	124875178	3655	-0.1105	0.02487	T	C	0.52	CD19 on IgD- CD24-	TRUE	reported	textfile
rs71307996	2.11e-06	1103352	3655	0.3537	0.07444	A	G	0.0272	CD19 on IgD- CD24-	TRUE	reported	textfile
rs76451648	2e-06	139618949	3655	0.2777	0.05834	C	T	0.0469	CD19 on IgD- CD24-	TRUE	reported	textfile
rs73254441	9.75e-06	113295200	3655	0.3945	0.08906	A	G	0.0201	CD19 on IgD- CD24-	TRUE	reported	textfile
rs16884870	3.21e-06	75109409	3655	0.2135	0.04578	C	T	0.0795	CD19 on IgD- CD24-	TRUE	reported	textfile
rs148597489	2.78e-06	72550483	3655	-0.8449	0.18	A	C	0.0045	CD19 on IgD- CD24-	TRUE	reported	textfile
rs75663256	9.17e-06	69895735	3655	0.1904	0.04286	A	C	0.0896	CD19 on IgD- CD24-	TRUE	reported	textfile
rs10906006	3.42e-06	11781967	3655	0.1265	0.0272	A	G	0.7248	CD19 on IgD- CD24-	TRUE	reported	textfile
rs61884722	3.71e-06	18601510	3655	0.8939	0.1929	C	T	0.0041	CD19 on IgD- CD24-	TRUE	reported	textfile
rs1164128	5.18e-06	112057432	3655	0.1146	0.02511	C	T	0.3759	CD19 on IgD- CD24-	TRUE	reported	textfile
rs7332415	3.3e-06	41688557	3655	-0.2327	0.04996	G	A	0.0648	CD19 on IgD- CD24-	TRUE	reported	textfile
rs148027681	9.53e-06	61899478	3655	0.8177	0.1844	C	G	0.0044	CD19 on IgD- CD24-	TRUE	reported	textfile
rs76709166	7.57e-06	20589957	3655	-0.4372	0.0975	C	A	0.0166	CD19 on IgD- CD24-	TRUE	reported	textfile
rs17315418	7.7e-06	70028833	3655	0.1196	0.02669	A	G	0.3174	CD19 on IgD- CD24-	TRUE	reported	textfile
rs11643297	7.72e-06	28973268	3655	0.114	0.02546	G	A	0.6112	CD19 on IgD- CD24-	TRUE	reported	textfile
rs1453509	7.9e-07	17014673	3655	-0.1879	0.03799	A	C	0.1181	CD19 on IgD- CD24-	TRUE	reported	textfile
rs12968867	1.28e-06	60850310	3655	-0.1275	0.02628	A	G	0.6743	CD19 on IgD- CD24-	TRUE	reported	textfile
rs2613786	6.98e-06	5137846	3655	-0.1142	0.02536	A	G	0.3739	CD19 on IgD- CD24-	TRUE	reported	textfile
rs73056862	3.82e-06	52235616	3655	0.2705	0.05845	T	C	0.0461	CD19 on IgD- CD24-	TRUE	reported	textfile
rs75656751	9.53e-06	38055091	3655	-0.3513	0.07924	T	C	0.0246	CD19 on IgD- CD24-	TRUE	reported	textfile
rs6577565	4.23e-06	6307255	3656	-0.1228	0.02666	C	T	0.6823	CD19 on IgD- CD27-	TRUE	reported	textfile
rs113747920	7.89e-06	27453519	3656	0.6675	0.1492	C	T	0.0067	CD19 on IgD- CD27-	TRUE	reported	textfile
rs59102092	5.23e-06	39551423	3656	-0.1649	0.03615	C	A	0.1368	CD19 on IgD- CD27-	TRUE	reported	textfile
rs1524155	2e-06	48878727	3656	0.1482	0.03114	A	T	0.8079	CD19 on IgD- CD27-	TRUE	reported	textfile
rs10192011	7.44e-06	53804261	3656	0.1217	0.02711	T	G	0.2899	CD19 on IgD- CD27-	TRUE	reported	textfile
rs7608595	4.97e-06	223088415	3656	0.1193	0.02609	C	T	0.6675	CD19 on IgD- CD27-	TRUE	reported	textfile
rs34205222	1.14e-06	1066077	3656	0.3581	0.07346	A	G	0.0279	CD19 on IgD- CD27-	TRUE	reported	textfile
rs242172	2.14e-06	60405606	3656	0.6101	0.1285	G	T	0.0093	CD19 on IgD- CD27-	TRUE	reported	textfile
rs12636323	8.12e-06	100795543	3656	0.1142	0.02557	T	G	0.3952	CD19 on IgD- CD27-	TRUE	reported	textfile
rs631691	5.36e-06	124875178	3656	-0.1133	0.02486	T	C	0.5201	CD19 on IgD- CD27-	TRUE	reported	textfile
rs115952864	1.44e-06	173244216	3656	0.414	0.08576	A	G	0.0208	CD19 on IgD- CD27-	TRUE	reported	textfile
rs116412781	4.18e-06	2746567	3656	0.2691	0.05837	T	C	0.0475	CD19 on IgD- CD27-	TRUE	reported	textfile
rs144574165	1.64e-06	163336202	3656	0.2567	0.05347	T	C	0.0581	CD19 on IgD- CD27-	TRUE	reported	textfile
rs142291539	5.32e-06	175612761	3656	0.3565	0.07821	A	G	0.0269	CD19 on IgD- CD27-	TRUE	reported	textfile
rs9350187	8.95e-06	19794487	3656	-0.2277	0.05119	T	C	0.0607	CD19 on IgD- CD27-	TRUE	reported	textfile
rs71555251	9.58e-06	75109171	3656	0.2028	0.04575	A	G	0.0796	CD19 on IgD- CD27-	TRUE	reported	textfile
rs62463053	8.02e-06	51994027	3656	-0.1259	0.02817	C	G	0.2629	CD19 on IgD- CD27-	TRUE	reported	textfile
rs75663256	3.91e-06	69895735	3656	0.1981	0.04284	A	C	0.0896	CD19 on IgD- CD27-	TRUE	reported	textfile
rs10216993	6.26e-06	142521360	3656	-0.1112	0.02458	T	C	0.4624	CD19 on IgD- CD27-	TRUE	reported	textfile
rs10821075	2.73e-06	95896099	3656	-0.1158	0.02466	A	G	0.4393	CD19 on IgD- CD27-	TRUE	reported	textfile
rs61884722	3.18e-06	18601510	3656	0.8987	0.1926	C	T	0.0041	CD19 on IgD- CD27-	TRUE	reported	textfile
rs148390689	5.27e-06	20089809	3656	-0.4166	0.09136	C	T	0.0186	CD19 on IgD- CD27-	TRUE	reported	textfile
rs114723901	6.8e-06	45169337	3656	-0.2039	0.04525	A	G	0.0873	CD19 on IgD- CD27-	TRUE	reported	textfile
rs11643297	5.23e-06	28973268	3656	0.1162	0.02547	G	A	0.6111	CD19 on IgD- CD27-	TRUE	reported	textfile
rs138920008	4.54e-07	32422808	3656	-1.105	0.2187	C	G	0.0041	CD19 on IgD- CD27-	TRUE	reported	textfile
rs12968867	1.92e-07	60850310	3656	-0.137	0.02626	A	G	0.6744	CD19 on IgD- CD27-	TRUE	reported	textfile
rs113612962	3.85e-06	43167446	3656	-0.2905	0.06279	C	G	0.0402	CD19 on IgD- CD27-	TRUE	reported	textfile
rs4927044	3.85e-06	48232179	3657	-0.2877	0.06219	A	G	0.0395	CD19 on IgD- CD38-	TRUE	reported	textfile
rs112978597	2.58e-06	12881809	3657	0.2426	0.05151	G	A	0.06	CD19 on IgD- CD38-	TRUE	reported	textfile
rs190416390	7.34e-06	159567199	3657	0.2145	0.04777	A	G	0.0708	CD19 on IgD- CD38-	TRUE	reported	textfile
rs72877897	5.27e-06	61116118	3657	0.1711	0.03753	A	T	0.1261	CD19 on IgD- CD38-	TRUE	reported	textfile
rs4702668	5.94e-06	10081219	3657	0.1172	0.02585	G	A	0.6701	CD19 on IgD- CD38-	TRUE	reported	textfile
rs67145622	2.27e-06	19588752	3657	-0.2671	0.05641	T	C	0.0476	CD19 on IgD- CD38-	TRUE	reported	textfile
rs114369132	1.59e-06	32409141	3657	0.6915	0.1438	A	C	0.0082	CD19 on IgD- CD38-	TRUE	reported	textfile
rs16884870	9.52e-06	75109409	3657	0.2031	0.04582	C	T	0.0794	CD19 on IgD- CD38-	TRUE	reported	textfile
rs62463053	1.86e-06	51994027	3657	-0.1346	0.02818	C	G	0.2628	CD19 on IgD- CD38-	TRUE	reported	textfile
rs273144	5.57e-06	41508880	3657	0.1142	0.02511	C	G	0.574	CD19 on IgD- CD38-	TRUE	reported	textfile
rs75663256	3.77e-06	69895735	3657	0.1984	0.04284	A	C	0.0896	CD19 on IgD- CD38-	TRUE	reported	textfile
rs964936	7.49e-06	142522071	3657	-0.1111	0.02477	T	G	0.4554	CD19 on IgD- CD38-	TRUE	reported	textfile
rs12554596	6.51e-06	37002142	3657	-0.1151	0.02548	G	A	0.3891	CD19 on IgD- CD38-	TRUE	reported	textfile
rs10761194	3.56e-06	95899884	3657	-0.1148	0.02474	A	G	0.4403	CD19 on IgD- CD38-	TRUE	reported	textfile
rs143330436	4.03e-06	26801194	3657	-1.278	0.2768	T	C	0.0021	CD19 on IgD- CD38-	TRUE	reported	textfile
rs12346584	1.15e-06	97103437	3657	0.136	0.02791	C	T	0.2743	CD19 on IgD- CD38-	TRUE	reported	textfile
rs112522781	9.63e-06	89650801	3657	0.2712	0.06119	A	G	0.0442	CD19 on IgD- CD38-	TRUE	reported	textfile
rs1164128	9.67e-06	112057432	3657	0.1113	0.02512	C	T	0.376	CD19 on IgD- CD38-	TRUE	reported	textfile
rs61154235	9.67e-06	77350459	3657	-1.171	0.2643	T	C	0.0022	CD19 on IgD- CD38-	TRUE	reported	textfile
rs12904834	1.44e-06	76897663	3657	-0.1252	0.02593	C	T	0.6325	CD19 on IgD- CD38-	TRUE	reported	textfile
rs7189927	1.07e-08	28913787	3657	0.1434	0.025	C	T	0.5982	CD19 on IgD- CD38-	TRUE	reported	textfile
rs2613786	5.99e-06	5137846	3657	-0.115	0.02536	A	G	0.3737	CD19 on IgD- CD38-	TRUE	reported	textfile
rs10420460	7.64e-06	57259311	3657	-0.1105	0.02465	C	T	0.5371	CD19 on IgD- CD38-	TRUE	reported	textfile
rs113612962	6.47e-07	43167446	3657	-0.3129	0.06277	C	G	0.0402	CD19 on IgD- CD38-	TRUE	reported	textfile
rs5762000	2.77e-06	27530934	3657	0.1472	0.03135	T	C	0.1854	CD19 on IgD- CD38-	TRUE	reported	textfile
rs10752607	6.76e-07	154716803	3658	0.1478	0.02969	A	G	0.7828	CD19 on IgD- CD38br	TRUE	reported	textfile
rs72816772	4.98e-06	75815457	3658	0.225	0.04921	T	C	0.0653	CD19 on IgD- CD38br	TRUE	reported	textfile
rs149234257	6.32e-06	7498941	3658	-0.4659	0.103	A	T	0.0141	CD19 on IgD- CD38br	TRUE	reported	textfile
rs6805030	4.3e-06	54576549	3658	-0.3596	0.07811	A	C	0.026	CD19 on IgD- CD38br	TRUE	reported	textfile
rs12374328	1.89e-06	61352640	3658	-0.2445	0.05123	A	T	0.0685	CD19 on IgD- CD38br	TRUE	reported	textfile
rs254079	2.8e-06	115891083	3658	0.125	0.02664	G	A	0.686	CD19 on IgD- CD38br	TRUE	reported	textfile
rs72998964	5.77e-06	150723408	3658	-0.2264	0.04986	A	G	0.0642	CD19 on IgD- CD38br	TRUE	reported	textfile
rs112139040	9.93e-06	46094636	3658	-1.043	0.2358	G	T	0.0029	CD19 on IgD- CD38br	TRUE	reported	textfile
rs139775632	5.63e-07	6917201	3658	-0.651	0.1299	G	A	0.009	CD19 on IgD- CD38br	TRUE	reported	textfile
rs79290247	7.05e-06	42996587	3658	-0.5608	0.1247	T	C	0.009	CD19 on IgD- CD38br	TRUE	reported	textfile
rs73718149	8.87e-06	144813778	3658	-0.4537	0.102	C	T	0.0153	CD19 on IgD- CD38br	TRUE	reported	textfile
rs147763919	4.19e-06	62358083	3658	0.2034	0.04414	C	A	0.0854	CD19 on IgD- CD38br	TRUE	reported	textfile
rs117647889	5.79e-06	1239174	3658	0.8414	0.1853	T	C	0.0042	CD19 on IgD- CD38br	TRUE	reported	textfile
rs117553718	4.57e-07	5865812	3658	0.5498	0.1088	A	G	0.0138	CD19 on IgD- CD38br	TRUE	reported	textfile
rs1871013	7.95e-06	27842066	3658	-0.1526	0.03413	A	G	0.8406	CD19 on IgD- CD38br	TRUE	reported	textfile
rs4968431	7.13e-07	59421778	3658	0.1321	0.0266	G	T	0.3198	CD19 on IgD- CD38br	TRUE	reported	textfile
rs75117490	2.11e-06	58322970	3658	0.1912	0.04025	G	A	0.1027	CD19 on IgD- CD38br	TRUE	reported	textfile
rs215237	5.79e-06	56404703	3658	-0.126	0.02775	A	G	0.7145	CD19 on IgD- CD38br	TRUE	reported	textfile
rs112417310	1.7e-09	206855483	3657	0.5373	0.08896	A	G	0.0201	CD19 on IgD- CD38dim	TRUE	reported	textfile
rs145924813	1.23e-06	28617041	3657	0.3435	0.07069	T	C	0.0327	CD19 on IgD- CD38dim	TRUE	reported	textfile
rs141619127	9.44e-06	204227546	3657	-0.7482	0.1687	T	C	0.0049	CD19 on IgD- CD38dim	TRUE	reported	textfile
rs113812519	2.47e-06	207276336	3657	0.4328	0.09174	G	A	0.0185	CD19 on IgD- CD38dim	TRUE	reported	textfile
rs80268044	6.86e-06	43810948	3657	0.1499	0.03329	A	G	0.1765	CD19 on IgD- CD38dim	TRUE	reported	textfile
rs74705306	9.87e-06	189782918	3657	-0.1965	0.0444	A	G	0.0812	CD19 on IgD- CD38dim	TRUE	reported	textfile
rs7665261	3.99e-06	26464043	3657	-0.7286	0.1577	T	C	0.006	CD19 on IgD- CD38dim	TRUE	reported	textfile
rs281142	1.11e-06	70969845	3657	0.2516	0.05157	A	G	0.0599	CD19 on IgD- CD38dim	TRUE	reported	textfile
rs56044553	1.23e-06	173972294	3657	0.1201	0.02471	T	C	0.4832	CD19 on IgD- CD38dim	TRUE	reported	textfile
rs73275737	4.35e-06	148626837	3657	-0.4649	0.101	G	C	0.0135	CD19 on IgD- CD38dim	TRUE	reported	textfile
rs764603	8.1e-06	36793516	3657	0.4781	0.107	C	A	0.0131	CD19 on IgD- CD38dim	TRUE	reported	textfile
rs2281460	4.14e-06	42130300	3657	0.1354	0.02936	A	G	0.2302	CD19 on IgD- CD38dim	TRUE	reported	textfile
rs9465443	1.81e-06	19563666	3657	-0.2674	0.05593	C	T	0.0483	CD19 on IgD- CD38dim	TRUE	reported	textfile
rs114369132	4.08e-06	32409141	3657	0.6636	0.1438	A	C	0.0082	CD19 on IgD- CD38dim	TRUE	reported	textfile
rs180723221	6.58e-06	103091403	3657	0.3335	0.0739	T	A	0.0342	CD19 on IgD- CD38dim	TRUE	reported	textfile
rs62463053	2.54e-06	51994027	3657	-0.1324	0.02809	C	G	0.2628	CD19 on IgD- CD38dim	TRUE	reported	textfile
rs2512433	5.05e-06	98632764	3657	0.1233	0.02699	G	A	0.3022	CD19 on IgD- CD38dim	TRUE	reported	textfile
rs560933055	4.53e-06	1717689	3657	-1.231	0.2681	A	T	0.0022	CD19 on IgD- CD38dim	TRUE	reported	textfile
rs17706571	8.85e-06	29271392	3657	0.4369	0.09817	T	C	0.0164	CD19 on IgD- CD38dim	TRUE	reported	textfile
rs2971439	3.79e-06	118282893	3657	0.1725	0.03725	G	T	0.8749	CD19 on IgD- CD38dim	TRUE	reported	textfile
rs6575228	6.81e-06	92561395	3657	-0.1117	0.02479	A	G	0.4125	CD19 on IgD- CD38dim	TRUE	reported	textfile
rs11643297	5.48e-11	28973268	3657	0.167	0.02538	G	A	0.611	CD19 on IgD- CD38dim	TRUE	reported	textfile
rs138920008	2.63e-12	32422808	3657	-1.514	0.2157	C	G	0.0041	CD19 on IgD- CD38dim	TRUE	reported	textfile
rs6500310	9.8e-06	50422996	3657	-0.1321	0.02984	T	C	0.2104	CD19 on IgD- CD38dim	TRUE	reported	textfile
rs7197237	4.72e-06	49673381	3657	0.1723	0.0376	A	G	0.1256	CD19 on IgD- CD38dim	TRUE	reported	textfile
rs6509969	6.05e-06	56415502	3657	0.145	0.032	A	G	0.819	CD19 on IgD- CD38dim	TRUE	reported	textfile
rs137949497	1.35e-06	32136760	3657	0.4884	0.1009	G	T	0.0146	CD19 on IgD- CD38dim	TRUE	reported	textfile
rs113612962	3.77e-08	43167446	3657	-0.3441	0.06242	C	G	0.0402	CD19 on IgD- CD38dim	TRUE	reported	textfile
rs5762000	6.89e-06	27530934	3657	0.1405	0.0312	T	C	0.1854	CD19 on IgD- CD38dim	TRUE	reported	textfile
rs112417310	5.79e-09	206855483	3658	0.5195	0.08901	A	G	0.0201	CD19 on IgD+	TRUE	reported	textfile
rs142109788	4.77e-07	149815561	3658	-1.964	0.3894	G	A	0.001	CD19 on IgD+	TRUE	reported	textfile
rs79856590	9.95e-08	205241642	3658	0.2733	0.05119	A	G	0.0608	CD19 on IgD+	TRUE	reported	textfile
rs11120838	2.56e-06	7149639	3658	-0.29	0.06156	G	C	0.0433	CD19 on IgD+	TRUE	reported	textfile
rs113812519	2.91e-08	207276336	3658	0.5095	0.09165	G	A	0.0185	CD19 on IgD+	TRUE	reported	textfile
rs1862061	6.85e-06	16800618	3658	-0.1395	0.03097	T	C	0.1877	CD19 on IgD+	TRUE	reported	textfile
rs1449311	4.33e-06	100703124	3658	0.1247	0.02709	A	G	0.3074	CD19 on IgD+	TRUE	reported	textfile
rs10518007	7.32e-06	67702525	3658	0.1956	0.04356	T	A	0.0883	CD19 on IgD+	TRUE	reported	textfile
rs79550250	9.66e-06	13123693	3658	-0.4057	0.09157	A	G	0.0183	CD19 on IgD+	TRUE	reported	textfile
rs115727814	3.83e-06	170699036	3658	-1.231	0.266	A	G	0.0021	CD19 on IgD+	TRUE	reported	textfile
rs76162621	7.13e-06	68486690	3658	-1.031	0.2293	G	A	0.0027	CD19 on IgD+	TRUE	reported	textfile
rs116364947	4.34e-06	36809211	3658	0.4837	0.1051	T	A	0.0134	CD19 on IgD+	TRUE	reported	textfile
rs17433679	7.85e-06	78097255	3658	0.1688	0.03772	G	A	0.1227	CD19 on IgD+	TRUE	reported	textfile
rs12216684	5.06e-07	56291533	3658	0.2695	0.05355	A	G	0.0544	CD19 on IgD+	TRUE	reported	textfile
rs80273434	3.06e-06	141772905	3658	-0.2514	0.05379	C	G	0.0534	CD19 on IgD+	TRUE	reported	textfile
rs557939103	8.6e-06	9079951	3658	0.3461	0.07768	A	G	0.0284	CD19 on IgD+	TRUE	reported	textfile
rs75912463	4.01e-06	133354402	3658	-3.126	0.6769	C	T	0.0003	CD19 on IgD+	TRUE	reported	textfile
rs34798965	7.64e-06	71647692	3658	-0.2013	0.04491	A	C	0.0789	CD19 on IgD+	TRUE	reported	textfile
rs10894538	8e-07	132222058	3658	-0.1971	0.03986	A	T	0.1059	CD19 on IgD+	TRUE	reported	textfile
rs117004076	1.75e-06	97702226	3658	0.4855	0.1014	G	A	0.0146	CD19 on IgD+	TRUE	reported	textfile
rs138920008	5.41e-07	32422808	3658	-1.092	0.2174	C	G	0.0041	CD19 on IgD+	TRUE	reported	textfile
rs78044532	9.14e-06	21168467	3658	0.3991	0.08984	T	C	0.0187	CD19 on IgD+	TRUE	reported	textfile
rs754067	1.13e-06	17323672	3658	-0.1891	0.03878	C	T	0.1143	CD19 on IgD+	TRUE	reported	textfile
rs1290397	3.43e-06	77948063	3658	0.1139	0.02449	A	G	0.5101	CD19 on IgD+	TRUE	reported	textfile
rs148381451	2.9e-07	63085557	3658	-0.2879	0.05601	T	C	0.0496	CD19 on IgD+	TRUE	reported	textfile
rs8109226	5.78e-06	710050	3658	0.1128	0.02483	G	T	0.437	CD19 on IgD+	TRUE	reported	textfile
rs2903728	5.62e-06	56408295	3658	-0.1762	0.03874	C	T	0.1147	CD19 on IgD+	TRUE	reported	textfile
rs34589185	9.87e-06	50761130	3658	0.1143	0.02583	T	G	0.3477	CD19 on IgD+	TRUE	reported	textfile
rs144392728	6.07e-06	33029820	3658	-0.2348	0.05183	T	A	0.0586	CD19 on IgD+	TRUE	reported	textfile
rs79856590	3.76e-08	205241642	3656	0.281	0.05096	A	G	0.0609	CD19 on IgD+ CD24-	TRUE	reported	textfile
rs113812519	6.42e-09	207276336	3656	0.5314	0.09132	G	A	0.0185	CD19 on IgD+ CD24-	TRUE	reported	textfile
rs11120838	7.4e-06	7149639	3656	-0.2755	0.06139	G	C	0.0434	CD19 on IgD+ CD24-	TRUE	reported	textfile
rs142109788	1.99e-07	149815561	3656	-2.026	0.3889	G	A	0.001	CD19 on IgD+ CD24-	TRUE	reported	textfile
rs112417310	3.8e-09	206855483	3656	0.5237	0.08866	A	G	0.0201	CD19 on IgD+ CD24-	TRUE	reported	textfile
rs1345010	3.79e-06	174113733	3656	0.192	0.04147	G	T	0.0946	CD19 on IgD+ CD24-	TRUE	reported	textfile
rs145392098	4.11e-06	95682916	3656	0.3549	0.07695	A	G	0.0272	CD19 on IgD+ CD24-	TRUE	reported	textfile
rs1449311	2.9e-06	100703124	3656	0.1265	0.02699	A	G	0.3074	CD19 on IgD+ CD24-	TRUE	reported	textfile
rs115727814	3.83e-06	170699036	3656	-1.228	0.2655	A	G	0.0021	CD19 on IgD+ CD24-	TRUE	reported	textfile
rs764603	4.43e-06	36793516	3656	0.4921	0.107	C	A	0.0131	CD19 on IgD+ CD24-	TRUE	reported	textfile
rs78895027	4.87e-06	112306917	3656	0.174	0.03801	C	T	0.1162	CD19 on IgD+ CD24-	TRUE	reported	textfile
rs9639817	6.84e-06	40085765	3656	-0.1116	0.02477	T	C	0.3861	CD19 on IgD+ CD24-	TRUE	reported	textfile
rs12216684	8.15e-07	56291533	3656	0.2641	0.05347	A	G	0.0543	CD19 on IgD+ CD24-	TRUE	reported	textfile
rs80273434	7.9e-06	141772905	3656	-0.24	0.05365	C	G	0.0535	CD19 on IgD+ CD24-	TRUE	reported	textfile
rs75912463	3.61e-06	133354402	3656	-3.14	0.6767	C	T	0.0003	CD19 on IgD+ CD24-	TRUE	reported	textfile
rs34798965	8.34e-06	71647692	3656	-0.2	0.04481	A	C	0.0788	CD19 on IgD+ CD24-	TRUE	reported	textfile
rs67316035	7.89e-07	132221605	3656	-0.1993	0.04029	A	T	0.1037	CD19 on IgD+ CD24-	TRUE	reported	textfile
rs17493333	6.67e-06	19098939	3656	-0.3491	0.07741	C	T	0.0246	CD19 on IgD+ CD24-	TRUE	reported	textfile
rs754067	2.96e-07	17323672	3656	-0.1986	0.03867	C	T	0.1142	CD19 on IgD+ CD24-	TRUE	reported	textfile
rs138920008	4.5e-08	32422808	3656	-1.188	0.2168	C	G	0.0041	CD19 on IgD+ CD24-	TRUE	reported	textfile
rs148381451	1.38e-06	63085557	3656	-0.2703	0.05589	T	C	0.0496	CD19 on IgD+ CD24-	TRUE	reported	textfile
rs1290397	1.16e-06	77948063	3656	0.1188	0.0244	A	G	0.51	CD19 on IgD+ CD24-	TRUE	reported	textfile
rs1986507	7.92e-06	10082301	3656	0.1399	0.03126	A	G	0.1859	CD19 on IgD+ CD24-	TRUE	reported	textfile
rs8109226	1.32e-06	710050	3656	0.1199	0.02475	G	T	0.437	CD19 on IgD+ CD24-	TRUE	reported	textfile
rs2903728	1.92e-06	56408295	3656	-0.1842	0.03863	C	T	0.1147	CD19 on IgD+ CD24-	TRUE	reported	textfile
rs112152495	9.43e-06	7096773	3656	-0.5737	0.1293	A	G	0.0086	CD19 on IgD+ CD24-	TRUE	reported	textfile
rs55712453	2.31e-10	206902437	3656	0.5738	0.09026	G	A	0.0201	CD19 on IgD+ CD24+	TRUE	reported	textfile
rs6678796	8.23e-06	247157835	3656	0.222	0.04971	T	C	0.9368	CD19 on IgD+ CD24+	TRUE	reported	textfile
rs4649080	4.26e-06	25737116	3656	0.1981	0.04302	T	C	0.0937	CD19 on IgD+ CD24+	TRUE	reported	textfile
rs113812519	1.92e-09	207276336	3656	0.5546	0.09212	G	A	0.0185	CD19 on IgD+ CD24+	TRUE	reported	textfile
rs144743804	5.5e-08	207018206	3656	0.4882	0.08965	A	G	0.0197	CD19 on IgD+ CD24+	TRUE	reported	textfile
rs140108418	1.15e-06	13573112	3656	2.034	0.4175	G	A	0.0008	CD19 on IgD+ CD24+	TRUE	reported	textfile
rs80268044	4.55e-07	43810948	3656	0.169	0.03343	A	G	0.1766	CD19 on IgD+ CD24+	TRUE	reported	textfile
rs9814135	8.61e-06	194094110	3656	-0.1722	0.03865	C	T	0.8839	CD19 on IgD+ CD24+	TRUE	reported	textfile
rs1595602	5.02e-06	61090473	3656	0.1664	0.0364	G	T	0.1365	CD19 on IgD+ CD24+	TRUE	reported	textfile
rs7665261	8.19e-06	26464043	3656	-0.7093	0.1588	T	C	0.006	CD19 on IgD+ CD24+	TRUE	reported	textfile
rs7718237	3.03e-06	173972852	3656	0.1163	0.02488	A	G	0.4837	CD19 on IgD+ CD24+	TRUE	reported	textfile
rs77175237	5.41e-06	72039498	3656	0.2578	0.0566	T	A	0.0483	CD19 on IgD+ CD24+	TRUE	reported	textfile
rs764603	4.88e-07	36793516	3656	0.5431	0.1078	C	A	0.0131	CD19 on IgD+ CD24+	TRUE	reported	textfile
rs76162621	9.03e-06	68486690	3656	-1.025	0.2306	G	A	0.0027	CD19 on IgD+ CD24+	TRUE	reported	textfile
rs7766104	9.15e-06	105665214	3656	-0.1365	0.03071	G	A	0.1979	CD19 on IgD+ CD24+	TRUE	reported	textfile
rs73393708	7.51e-06	90292336	3656	0.157	0.03499	G	T	0.1513	CD19 on IgD+ CD24+	TRUE	reported	textfile
rs78007482	5.68e-06	133189482	3656	-0.2074	0.04563	A	T	0.0819	CD19 on IgD+ CD24+	TRUE	reported	textfile
rs12554596	8.19e-06	37002142	3656	-0.1142	0.02558	G	A	0.3892	CD19 on IgD+ CD24+	TRUE	reported	textfile
rs10999014	7.23e-06	71648522	3656	-0.1593	0.03545	T	C	0.1413	CD19 on IgD+ CD24+	TRUE	reported	textfile
rs117006645	2.99e-06	108143796	3656	-2.485	0.5312	G	A	0.0004	CD19 on IgD+ CD24+	TRUE	reported	textfile
rs28560225	3.89e-06	125700760	3656	0.1234	0.02669	G	A	0.6921	CD19 on IgD+ CD24+	TRUE	reported	textfile
rs6602758	8.49e-06	14778920	3656	-0.2961	0.06641	T	C	0.0342	CD19 on IgD+ CD24+	TRUE	reported	textfile
rs560933055	1.28e-06	1717689	3656	-1.311	0.2703	A	T	0.0022	CD19 on IgD+ CD24+	TRUE	reported	textfile
rs118075417	8.31e-06	109625907	3656	-1.78	0.3988	T	C	0.001	CD19 on IgD+ CD24+	TRUE	reported	textfile
rs871361	2.81e-06	124563662	3656	-1.225	0.2611	G	C	0.0022	CD19 on IgD+ CD24+	TRUE	reported	textfile
rs4942349	1.29e-06	31564105	3656	-0.1282	0.02644	G	A	0.3333	CD19 on IgD+ CD24+	TRUE	reported	textfile
rs6575228	8.37e-07	92561395	3656	-0.1231	0.02494	A	G	0.4126	CD19 on IgD+ CD24+	TRUE	reported	textfile
rs7195635	7.03e-06	58513959	3656	1.056	0.2347	A	G	0.0029	CD19 on IgD+ CD24+	TRUE	reported	textfile
rs138920008	1.26e-09	32422808	3656	-1.326	0.2178	C	G	0.0041	CD19 on IgD+ CD24+	TRUE	reported	textfile
rs11643297	7.82e-09	28973268	3656	0.148	0.02557	G	A	0.6109	CD19 on IgD+ CD24+	TRUE	reported	textfile
rs9892181	7.06e-06	76534817	3656	-0.3924	0.08722	C	G	0.9792	CD19 on IgD+ CD24+	TRUE	reported	textfile
rs148381451	1.68e-06	63085557	3656	-0.27	0.0563	T	C	0.0496	CD19 on IgD+ CD24+	TRUE	reported	textfile
rs72988602	6.04e-07	7114038	3656	0.1848	0.03697	G	A	0.1347	CD19 on IgD+ CD24+	TRUE	reported	textfile
rs77697711	4e-06	45116977	3656	0.2112	0.04573	A	C	0.081	CD19 on IgD+ CD24+	TRUE	reported	textfile
rs113612962	2.11e-06	43167446	3656	-0.2991	0.06296	C	G	0.0402	CD19 on IgD+ CD24+	TRUE	reported	textfile
rs5762000	4.68e-06	27530934	3656	0.1441	0.03143	T	C	0.1854	CD19 on IgD+ CD24+	TRUE	reported	textfile
rs55712453	1.87e-07	206902437	3645	0.4679	0.0896	G	A	0.0202	CD19 on IgD+ CD38-	TRUE	reported	textfile
rs34762764	3.92e-06	47996882	3645	0.1303	0.02818	T	C	0.2642	CD19 on IgD+ CD38-	TRUE	reported	textfile
rs142109788	8.58e-06	149815561	3645	-1.738	0.3899	G	A	0.001	CD19 on IgD+ CD38-	TRUE	reported	textfile
rs113812519	3.34e-06	207276336	3645	0.426	0.0915	G	A	0.0185	CD19 on IgD+ CD38-	TRUE	reported	textfile
rs79856590	9.33e-07	205241642	3645	0.251	0.05108	A	G	0.0609	CD19 on IgD+ CD38-	TRUE	reported	textfile
rs11733521	4.7e-06	68968349	3645	-0.2298	0.05013	T	C	0.0645	CD19 on IgD+ CD38-	TRUE	reported	textfile
rs115727814	1.66e-06	170699036	3645	-1.275	0.2657	A	G	0.0021	CD19 on IgD+ CD38-	TRUE	reported	textfile
rs6554147	9.67e-06	54958646	3645	0.1117	0.02521	G	T	0.6047	CD19 on IgD+ CD38-	TRUE	reported	textfile
rs186239326	6.84e-06	2511082	3645	-0.6898	0.1531	G	C	0.0067	CD19 on IgD+ CD38-	TRUE	reported	textfile
rs6908848	5.93e-06	14717247	3645	0.7204	0.1588	A	G	0.0058	CD19 on IgD+ CD38-	TRUE	reported	textfile
rs11764670	9.71e-06	76455763	3645	0.1182	0.02667	G	A	0.6811	CD19 on IgD+ CD38-	TRUE	reported	textfile
rs118033073	6.82e-06	9086777	3645	0.3019	0.067	A	G	0.0353	CD19 on IgD+ CD38-	TRUE	reported	textfile
rs62524107	3.53e-06	141805137	3645	-0.2485	0.05349	C	T	0.0527	CD19 on IgD+ CD38-	TRUE	reported	textfile
rs12554596	1.82e-07	37002142	3645	-0.1325	0.02534	G	A	0.3892	CD19 on IgD+ CD38-	TRUE	reported	textfile
rs10738775	5.71e-06	27514318	3645	0.1169	0.02572	A	T	0.6547	CD19 on IgD+ CD38-	TRUE	reported	textfile
rs75912463	5.71e-06	133354402	3645	-3.081	0.678	C	T	0.0003	CD19 on IgD+ CD38-	TRUE	reported	textfile
rs6602758	7.93e-06	14778920	3645	-0.2958	0.06612	T	C	0.0342	CD19 on IgD+ CD38-	TRUE	reported	textfile
rs112802874	1.87e-06	89640021	3645	0.429	0.08985	G	T	0.0207	CD19 on IgD+ CD38-	TRUE	reported	textfile
rs11051699	5.83e-06	32107411	3645	-0.1644	0.03621	C	T	0.1387	CD19 on IgD+ CD38-	TRUE	reported	textfile
rs74518629	7.7e-06	130845523	3645	-0.2768	0.06178	T	C	0.0388	CD19 on IgD+ CD38-	TRUE	reported	textfile
rs75382958	9.72e-06	70194834	3645	0.1534	0.03463	G	A	0.1455	CD19 on IgD+ CD38-	TRUE	reported	textfile
rs117004076	2.42e-06	97702226	3645	0.4784	0.1013	G	A	0.0147	CD19 on IgD+ CD38-	TRUE	reported	textfile
rs7496584	8.43e-06	23877607	3645	0.1377	0.03087	C	A	0.7989	CD19 on IgD+ CD38-	TRUE	reported	textfile
rs78044532	3.02e-06	21168467	3645	0.4192	0.08962	T	C	0.0188	CD19 on IgD+ CD38-	TRUE	reported	textfile
rs118099810	4.63e-06	2406183	3645	0.2451	0.05343	T	C	0.0572	CD19 on IgD+ CD38-	TRUE	reported	textfile
rs138920008	8.1e-06	32422808	3645	-0.9714	0.2174	C	G	0.0041	CD19 on IgD+ CD38-	TRUE	reported	textfile
rs2356414	1.27e-06	71378301	3645	0.1555	0.03203	T	C	0.8106	CD19 on IgD+ CD38-	TRUE	reported	textfile
rs148381451	7.83e-06	63085557	3645	-0.2511	0.0561	T	C	0.0495	CD19 on IgD+ CD38-	TRUE	reported	textfile
rs6567179	8.41e-06	58273913	3645	-0.1316	0.0295	C	T	0.2189	CD19 on IgD+ CD38-	TRUE	reported	textfile
rs73056862	4.89e-06	52235616	3645	0.2658	0.05809	T	C	0.0462	CD19 on IgD+ CD38-	TRUE	reported	textfile
rs34488330	8.76e-06	7105841	3645	-0.473	0.1062	C	A	0.0128	CD19 on IgD+ CD38-	TRUE	reported	textfile
rs144392728	7.14e-06	33029820	3645	-0.2327	0.05175	T	A	0.0588	CD19 on IgD+ CD38-	TRUE	reported	textfile
rs142109788	1.15e-06	149815561	1830	-2.259	0.4629	G	A	0.0014	CD19 on IgD+ CD38- naive	TRUE	reported	textfile
rs75320486	5.89e-06	206842241	1830	0.4722	0.1039	A	G	0.0262	CD19 on IgD+ CD38- naive	TRUE	reported	textfile
rs113812519	5.76e-06	207276336	1830	0.5292	0.1164	G	A	0.0213	CD19 on IgD+ CD38- naive	TRUE	reported	textfile
rs10754999	4.03e-06	184906937	1830	-0.181	0.03915	C	G	0.7503	CD19 on IgD+ CD38- naive	TRUE	reported	textfile
rs11926501	2.65e-06	9722257	1830	-0.3399	0.07215	T	C	0.059	CD19 on IgD+ CD38- naive	TRUE	reported	textfile
rs402710	6.92e-06	1320722	1830	0.1545	0.03427	T	C	0.3574	CD19 on IgD+ CD38- naive	TRUE	reported	textfile
rs78895027	5.3e-06	112306917	1830	0.2382	0.05218	C	T	0.1161	CD19 on IgD+ CD38- naive	TRUE	reported	textfile
rs28721574	8.65e-06	29709714	1830	0.3142	0.07043	G	A	0.0689	CD19 on IgD+ CD38- naive	TRUE	reported	textfile
rs16939238	4.13e-06	77030281	1830	0.3682	0.07973	T	G	0.0464	CD19 on IgD+ CD38- naive	TRUE	reported	textfile
rs75912463	4.31e-06	133354402	1830	-3.167	0.6869	C	T	0.0005	CD19 on IgD+ CD38- naive	TRUE	reported	textfile
rs1687384	9.85e-06	117088120	1830	-0.1573	0.03549	C	T	0.6148	CD19 on IgD+ CD38- naive	TRUE	reported	textfile
rs72716013	8.92e-06	71165158	1830	0.1538	0.03452	G	A	0.3642	CD19 on IgD+ CD38- naive	TRUE	reported	textfile
rs117004076	9.66e-06	97702226	1830	0.5709	0.1287	G	A	0.018	CD19 on IgD+ CD38- naive	TRUE	reported	textfile
rs4074448	2.96e-06	63888495	1830	-0.1583	0.03377	A	G	0.538	CD19 on IgD+ CD38- naive	TRUE	reported	textfile
rs17637675	4.05e-06	79029574	1830	-0.1985	0.04294	G	A	0.1855	CD19 on IgD+ CD38- naive	TRUE	reported	textfile
rs12451409	1.09e-06	45544856	1830	-0.1632	0.03336	G	A	0.5544	CD19 on IgD+ CD38- naive	TRUE	reported	textfile
rs80090296	9.47e-06	42110459	1830	0.175	0.03939	T	C	0.2372	CD19 on IgD+ CD38- naive	TRUE	reported	textfile
rs4022330	1.16e-06	54781843	1830	-0.1654	0.0339	T	C	0.5139	CD19 on IgD+ CD38- naive	TRUE	reported	textfile
rs6127744	7.94e-06	54986274	1830	0.209	0.04666	T	G	0.1536	CD19 on IgD+ CD38- naive	TRUE	reported	textfile
rs10494895	3.33e-06	208466901	1833	0.4571	0.09801	G	A	0.0314	CD19 on IgD+ CD38- unsw mem	TRUE	reported	textfile
rs2419379	8.83e-06	190433277	1833	0.1678	0.03766	T	A	0.3145	CD19 on IgD+ CD38- unsw mem	TRUE	reported	textfile
rs113812519	7.39e-10	207276336	1833	0.7181	0.116	G	A	0.0215	CD19 on IgD+ CD38- unsw mem	TRUE	reported	textfile
rs138155833	5.25e-06	207698087	1833	0.2322	0.05084	T	A	0.129	CD19 on IgD+ CD38- unsw mem	TRUE	reported	textfile
rs7525464	1.7e-06	154727881	1833	0.1603	0.03338	G	C	0.4514	CD19 on IgD+ CD38- unsw mem	TRUE	reported	textfile
rs55712453	9.18e-11	206902437	1833	0.7788	0.1195	G	A	0.0205	CD19 on IgD+ CD38- unsw mem	TRUE	reported	textfile
rs144743804	1.65e-08	207018206	1833	0.6567	0.1158	A	G	0.0224	CD19 on IgD+ CD38- unsw mem	TRUE	reported	textfile
rs859655	2.75e-06	172650450	1833	-0.1601	0.03403	G	A	0.5417	CD19 on IgD+ CD38- unsw mem	TRUE	reported	textfile
rs72999235	8.85e-06	231874716	1833	0.4734	0.1062	C	T	0.0259	CD19 on IgD+ CD38- unsw mem	TRUE	reported	textfile
rs140108418	3.16e-06	13573112	1833	2.132	0.4562	G	A	0.0014	CD19 on IgD+ CD38- unsw mem	TRUE	reported	textfile
rs7600804	3.58e-06	85912030	1833	-2.317	0.4985	C	G	0.0011	CD19 on IgD+ CD38- unsw mem	TRUE	reported	textfile
rs200576624	7.62e-06	110142387	1833	0.4441	0.09895	A	G	0.033	CD19 on IgD+ CD38- unsw mem	TRUE	reported	textfile
rs140761841	1.43e-06	747378	1833	0.9699	0.2005	T	C	0.0065	CD19 on IgD+ CD38- unsw mem	TRUE	reported	textfile
rs4702668	1.71e-07	10081219	1833	0.1867	0.03558	G	A	0.6669	CD19 on IgD+ CD38- unsw mem	TRUE	reported	textfile
rs148774606	4.81e-06	149841015	1833	-1.674	0.365	C	T	0.0019	CD19 on IgD+ CD38- unsw mem	TRUE	reported	textfile
rs77518858	6.83e-06	15735864	1833	0.5456	0.1209	C	G	0.0218	CD19 on IgD+ CD38- unsw mem	TRUE	reported	textfile
rs80168996	5.11e-06	44882040	1833	-0.3078	0.06729	C	A	0.0685	CD19 on IgD+ CD38- unsw mem	TRUE	reported	textfile
rs78653777	1.78e-06	3472861	1833	0.2693	0.05619	T	C	0.1045	CD19 on IgD+ CD38- unsw mem	TRUE	reported	textfile
rs13250240	3.17e-06	130552677	1833	1.066	0.228	C	T	0.9945	CD19 on IgD+ CD38- unsw mem	TRUE	reported	textfile
rs11840245	8.31e-06	111300129	1833	0.4848	0.1085	T	C	0.0243	CD19 on IgD+ CD38- unsw mem	TRUE	reported	textfile
rs11617402	3.58e-06	22970185	1833	-0.517	0.1112	C	T	0.0235	CD19 on IgD+ CD38- unsw mem	TRUE	reported	textfile
rs4900483	3.34e-06	101566637	1833	0.5564	0.1193	T	C	0.0188	CD19 on IgD+ CD38- unsw mem	TRUE	reported	textfile
rs17723384	3.73e-06	34579231	1833	-1.012	0.2181	A	C	0.0065	CD19 on IgD+ CD38- unsw mem	TRUE	reported	textfile
rs61610275	5.09e-06	13040257	1833	-0.4128	0.09024	T	A	0.0387	CD19 on IgD+ CD38- unsw mem	TRUE	reported	textfile
rs9945791	6.94e-06	36882371	1833	-0.2232	0.0495	T	C	0.8617	CD19 on IgD+ CD38- unsw mem	TRUE	reported	textfile
rs112417310	5.43e-13	206855483	3657	0.6504	0.08983	A	G	0.0201	CD19 on IgD+ CD38br	TRUE	reported	textfile
rs144743804	1.07e-11	207018206	3657	0.6138	0.09002	A	G	0.0197	CD19 on IgD+ CD38br	TRUE	reported	textfile
rs2026774	6.04e-07	86076069	3657	0.1679	0.03358	C	T	0.8352	CD19 on IgD+ CD38br	TRUE	reported	textfile
rs113812519	2.55e-13	207276336	3657	0.6788	0.09244	G	A	0.0185	CD19 on IgD+ CD38br	TRUE	reported	textfile
rs10737202	2.93e-06	234499381	3657	-0.1243	0.02655	C	T	0.3389	CD19 on IgD+ CD38br	TRUE	reported	textfile
rs13030427	4.29e-06	208879261	3657	0.1463	0.03178	A	G	0.1957	CD19 on IgD+ CD38br	TRUE	reported	textfile
rs9880620	5.28e-08	61111881	3657	0.184	0.03373	T	C	0.1658	CD19 on IgD+ CD38br	TRUE	reported	textfile
rs4518167	5.59e-06	97446508	3657	-1.245	0.2737	C	T	0.9979	CD19 on IgD+ CD38br	TRUE	reported	textfile
rs115761380	5.07e-06	32376405	3657	0.5704	0.1248	G	A	0.0098	CD19 on IgD+ CD38br	TRUE	reported	textfile
rs72721695	9.1e-06	153625808	3657	0.1767	0.03976	A	C	0.1102	CD19 on IgD+ CD38br	TRUE	reported	textfile
rs76162621	3.55e-06	68486690	3657	-1.077	0.232	G	A	0.0027	CD19 on IgD+ CD38br	TRUE	reported	textfile
rs2516390	5.49e-06	31529883	3657	-0.1265	0.02779	T	C	0.5991	CD19 on IgD+ CD38br	TRUE	reported	textfile
rs12216684	1.32e-06	56291533	3657	0.2629	0.05427	A	G	0.0543	CD19 on IgD+ CD38br	TRUE	reported	textfile
rs67316035	8.52e-06	132221605	3657	-0.1824	0.04093	A	T	0.1036	CD19 on IgD+ CD38br	TRUE	reported	textfile
rs117442206	8.41e-07	25430787	3657	-0.2889	0.05856	T	C	0.0481	CD19 on IgD+ CD38br	TRUE	reported	textfile
rs2204990	7.68e-06	22791563	3657	-0.1141	0.02547	A	G	0.5775	CD19 on IgD+ CD38br	TRUE	reported	textfile
rs138920008	6.5e-11	32422808	3657	-1.438	0.2195	C	G	0.0041	CD19 on IgD+ CD38br	TRUE	reported	textfile
rs148381451	9.51e-06	63085557	3657	-0.2516	0.05674	T	C	0.0496	CD19 on IgD+ CD38br	TRUE	reported	textfile
rs187374346	2.1e-06	7091080	3657	-0.6872	0.1446	A	G	0.0074	CD19 on IgD+ CD38br	TRUE	reported	textfile
rs59977691	9.26e-07	19012358	3657	0.2163	0.044	A	G	0.0868	CD19 on IgD+ CD38br	TRUE	reported	textfile
rs137949497	7.15e-06	32136760	3657	0.4609	0.1025	G	T	0.0146	CD19 on IgD+ CD38br	TRUE	reported	textfile
rs142109788	1.11e-06	149815561	3657	-1.903	0.39	G	A	0.001	CD19 on IgD+ CD38dim	TRUE	reported	textfile
rs113812519	1.22e-09	207276336	3657	0.5583	0.09163	G	A	0.0185	CD19 on IgD+ CD38dim	TRUE	reported	textfile
rs112417310	3.65e-10	206855483	3657	0.5594	0.089	A	G	0.0201	CD19 on IgD+ CD38dim	TRUE	reported	textfile
rs144743804	1.34e-08	207018206	3657	0.5079	0.0892	A	G	0.0197	CD19 on IgD+ CD38dim	TRUE	reported	textfile
rs1345010	3.55e-06	174113733	3657	0.1933	0.04163	G	T	0.0946	CD19 on IgD+ CD38dim	TRUE	reported	textfile
rs143403164	4.86e-06	111246616	3657	-0.5736	0.1253	A	G	0.01	CD19 on IgD+ CD38dim	TRUE	reported	textfile
rs1449311	7.03e-06	100703124	3657	0.122	0.02712	A	G	0.3074	CD19 on IgD+ CD38dim	TRUE	reported	textfile
rs115727814	8.45e-06	170699036	3657	-1.188	0.2664	A	G	0.0021	CD19 on IgD+ CD38dim	TRUE	reported	textfile
rs12642193	5.88e-06	25916457	3657	-0.1521	0.03353	G	A	0.1575	CD19 on IgD+ CD38dim	TRUE	reported	textfile
rs13164259	8.34e-06	82870211	3657	0.5914	0.1325	A	C	0.0083	CD19 on IgD+ CD38dim	TRUE	reported	textfile
rs764603	3.59e-06	36793516	3657	0.4986	0.1074	C	A	0.0131	CD19 on IgD+ CD38dim	TRUE	reported	textfile
rs2524090	6.77e-06	31240823	3657	-0.1539	0.03414	A	C	0.31	CD19 on IgD+ CD38dim	TRUE	reported	textfile
rs12216684	1.06e-06	56291533	3657	0.2624	0.05367	A	G	0.0543	CD19 on IgD+ CD38dim	TRUE	reported	textfile
rs80273434	5.02e-06	141772905	3657	-0.2461	0.05384	C	G	0.0535	CD19 on IgD+ CD38dim	TRUE	reported	textfile
rs75912463	3.93e-06	133354402	3657	-3.133	0.6779	C	T	0.0003	CD19 on IgD+ CD38dim	TRUE	reported	textfile
rs76289004	3.52e-06	67011620	3657	-0.4991	0.1075	G	A	0.0139	CD19 on IgD+ CD38dim	TRUE	reported	textfile
rs11825488	9.26e-06	72165045	3657	-1.124	0.253	A	G	0.0021	CD19 on IgD+ CD38dim	TRUE	reported	textfile
rs67316035	5.99e-06	132221605	3657	-0.1835	0.04047	A	T	0.1036	CD19 on IgD+ CD38dim	TRUE	reported	textfile
rs79699942	6.66e-06	44929593	3657	0.1807	0.04005	G	A	0.1107	CD19 on IgD+ CD38dim	TRUE	reported	textfile
rs1955142	2.02e-06	65505785	3657	0.124	0.02605	C	A	0.6449	CD19 on IgD+ CD38dim	TRUE	reported	textfile
rs754067	1.21e-07	17323672	3657	-0.2058	0.0388	C	T	0.1143	CD19 on IgD+ CD38dim	TRUE	reported	textfile
rs138920008	1.5e-08	32422808	3657	-1.234	0.2174	C	G	0.0041	CD19 on IgD+ CD38dim	TRUE	reported	textfile
rs148381451	4.8e-06	63085557	3657	-0.257	0.05611	T	C	0.0496	CD19 on IgD+ CD38dim	TRUE	reported	textfile
rs1290397	2.67e-06	77948063	3657	0.1153	0.02452	A	G	0.51	CD19 on IgD+ CD38dim	TRUE	reported	textfile
rs2903728	9.58e-06	56408295	3657	-0.1719	0.03879	C	T	0.1147	CD19 on IgD+ CD38dim	TRUE	reported	textfile
rs113812519	6.04e-08	207276336	3657	0.4995	0.09201	G	A	0.0185	CD19 on memory B cell	TRUE	reported	textfile
rs4649079	5.24e-07	25535823	3657	0.2137	0.04252	T	C	0.0961	CD19 on memory B cell	TRUE	reported	textfile
rs10917581	8.08e-06	162624504	3657	0.1276	0.02854	G	A	0.2532	CD19 on memory B cell	TRUE	reported	textfile
rs112417310	1.12e-08	206855483	3657	0.5116	0.08936	A	G	0.0201	CD19 on memory B cell	TRUE	reported	textfile
rs79856590	5.3e-07	205241642	3657	0.2581	0.05138	A	G	0.0608	CD19 on memory B cell	TRUE	reported	textfile
rs80268044	8.82e-06	43810948	3657	0.1485	0.03337	A	G	0.1765	CD19 on memory B cell	TRUE	reported	textfile
rs1439005	4.29e-06	61094800	3657	-0.1134	0.02463	C	G	0.4588	CD19 on memory B cell	TRUE	reported	textfile
rs7665261	2.7e-06	26464043	3657	-0.7447	0.1584	T	C	0.006	CD19 on memory B cell	TRUE	reported	textfile
rs7718237	8.1e-06	173972852	3657	0.111	0.02483	A	G	0.4837	CD19 on memory B cell	TRUE	reported	textfile
rs576166	1.65e-06	33567104	3657	-0.1736	0.03616	G	T	0.1421	CD19 on memory B cell	TRUE	reported	textfile
rs184318978	5.69e-06	37497511	3657	-0.3515	0.07734	G	A	0.0272	CD19 on memory B cell	TRUE	reported	textfile
rs9350187	2.34e-06	19794487	3657	-0.2424	0.05126	T	C	0.0607	CD19 on memory B cell	TRUE	reported	textfile
rs767666	6.74e-06	43485898	3657	-0.1542	0.0342	G	A	0.8441	CD19 on memory B cell	TRUE	reported	textfile
rs73393708	3.88e-06	90292336	3657	0.1615	0.03492	G	T	0.1512	CD19 on memory B cell	TRUE	reported	textfile
rs78007482	8.83e-06	133189482	3657	-0.2027	0.04554	A	T	0.082	CD19 on memory B cell	TRUE	reported	textfile
rs75904904	1.81e-06	36949205	3657	-0.9043	0.1891	A	C	0.0044	CD19 on memory B cell	TRUE	reported	textfile
rs560933055	7.4e-07	1717689	3657	-1.338	0.2699	A	T	0.0022	CD19 on memory B cell	TRUE	reported	textfile
rs7900621	5.74e-06	125702232	3657	0.1121	0.02468	G	A	0.5041	CD19 on memory B cell	TRUE	reported	textfile
rs17706571	6.96e-06	29271392	3657	0.4437	0.09858	T	C	0.0164	CD19 on memory B cell	TRUE	reported	textfile
rs766977	9.33e-06	50290056	3657	-0.4502	0.1014	A	G	0.015	CD19 on memory B cell	TRUE	reported	textfile
rs10162314	8.52e-06	70990398	3657	0.4901	0.1099	A	G	0.0127	CD19 on memory B cell	TRUE	reported	textfile
rs11643297	7.89e-09	28973268	3657	0.1475	0.02551	G	A	0.611	CD19 on memory B cell	TRUE	reported	textfile
rs138920008	4.85e-09	32422808	3657	-1.277	0.2176	C	G	0.0041	CD19 on memory B cell	TRUE	reported	textfile
rs72988602	3.72e-06	7114038	3657	0.171	0.0369	G	A	0.1348	CD19 on memory B cell	TRUE	reported	textfile
rs2903728	2.8e-06	56408295	3657	-0.1824	0.03887	C	T	0.1147	CD19 on memory B cell	TRUE	reported	textfile
rs138273613	9.16e-06	39369842	3657	-1.118	0.2517	T	G	0.0023	CD19 on memory B cell	TRUE	reported	textfile
rs5762000	8.08e-07	27530934	3657	0.1549	0.03135	T	C	0.1854	CD19 on memory B cell	TRUE	reported	textfile
rs113612962	6.53e-07	43167446	3657	-0.313	0.0628	C	G	0.0402	CD19 on memory B cell	TRUE	reported	textfile
rs79856590	1.05e-08	205241642	3653	0.292	0.05091	A	G	0.0609	CD19 on naive-mature B cell	TRUE	reported	textfile
rs142109788	4.49e-06	149815561	3653	-1.789	0.3894	G	A	0.001	CD19 on naive-mature B cell	TRUE	reported	textfile
rs75320486	2.72e-08	206842241	3653	0.4393	0.07886	A	G	0.0246	CD19 on naive-mature B cell	TRUE	reported	textfile
rs113812519	5.41e-08	207276336	3653	0.4972	0.09126	G	A	0.0185	CD19 on naive-mature B cell	TRUE	reported	textfile
rs34165814	3.82e-06	89486664	3653	0.2572	0.05558	C	T	0.0791	CD19 on naive-mature B cell	TRUE	reported	textfile
rs1449311	3.1e-06	100703124	3653	0.1261	0.027	A	G	0.3073	CD19 on naive-mature B cell	TRUE	reported	textfile
rs11733521	9.49e-06	68968349	3653	-0.222	0.05005	T	C	0.0643	CD19 on naive-mature B cell	TRUE	reported	textfile
rs78895027	2.05e-06	112306917	3653	0.1806	0.03797	C	T	0.1163	CD19 on naive-mature B cell	TRUE	reported	textfile
rs117065975	3.83e-06	142183647	3653	0.639	0.1381	G	A	0.0081	CD19 on naive-mature B cell	TRUE	reported	textfile
rs9469775	9.5e-06	34335091	3653	-0.1264	0.02851	T	C	0.2658	CD19 on naive-mature B cell	TRUE	reported	textfile
rs76162621	5.37e-06	68486690	3653	-1.041	0.2284	G	A	0.0027	CD19 on naive-mature B cell	TRUE	reported	textfile
rs12216684	5.39e-07	56291533	3653	0.2683	0.05345	A	G	0.0543	CD19 on naive-mature B cell	TRUE	reported	textfile
rs62524107	3.95e-06	141805137	3653	-0.2466	0.05336	C	T	0.0527	CD19 on naive-mature B cell	TRUE	reported	textfile
rs147319341	9.63e-06	11301733	3653	0.3826	0.08634	A	G	0.02	CD19 on naive-mature B cell	TRUE	reported	textfile
rs75912463	4.94e-06	133354402	3653	-3.099	0.6775	C	T	0.0003	CD19 on naive-mature B cell	TRUE	reported	textfile
rs34798965	5.48e-06	71647692	3653	-0.2039	0.04479	A	C	0.0788	CD19 on naive-mature B cell	TRUE	reported	textfile
rs11825488	4.7e-06	72165045	3653	-1.158	0.2525	A	G	0.0021	CD19 on naive-mature B cell	TRUE	reported	textfile
rs67316035	1.75e-06	132221605	3653	-0.1929	0.04028	A	T	0.1038	CD19 on naive-mature B cell	TRUE	reported	textfile
rs79699942	4.28e-06	44929593	3653	0.1835	0.03985	G	A	0.1109	CD19 on naive-mature B cell	TRUE	reported	textfile
rs74455073	5.4e-06	54902972	3653	-0.1998	0.04387	C	T	0.0921	CD19 on naive-mature B cell	TRUE	reported	textfile
rs10875904	6.15e-06	49357889	3653	0.1128	0.02491	C	A	0.4472	CD19 on naive-mature B cell	TRUE	reported	textfile
rs12100549	9.33e-06	103417030	3653	0.2694	0.06071	T	C	0.0402	CD19 on naive-mature B cell	TRUE	reported	textfile
rs11855577	8.75e-06	65507482	3653	0.1154	0.02592	G	C	0.6428	CD19 on naive-mature B cell	TRUE	reported	textfile
rs117634515	6.91e-06	88610884	3653	-0.937	0.2081	T	G	0.0031	CD19 on naive-mature B cell	TRUE	reported	textfile
rs138920008	2.3e-06	32422808	3653	-1.027	0.2171	C	G	0.0041	CD19 on naive-mature B cell	TRUE	reported	textfile
rs754067	4.18e-06	17323672	3653	-0.1784	0.0387	C	T	0.1142	CD19 on naive-mature B cell	TRUE	reported	textfile
rs148381451	3.77e-06	63085557	3653	-0.2588	0.05589	T	C	0.0497	CD19 on naive-mature B cell	TRUE	reported	textfile
rs2903728	3.58e-06	56408295	3653	-0.1792	0.03861	C	T	0.1148	CD19 on naive-mature B cell	TRUE	reported	textfile
rs593715	1.62e-06	50734394	3653	0.1409	0.02934	A	G	0.2224	CD19 on naive-mature B cell	TRUE	reported	textfile
rs11585051	2.31e-06	235762345	3657	0.116	0.02451	A	G	0.5766	CD19 on PB/PC	TRUE	reported	textfile
rs78175608	7.23e-06	233868788	3657	0.2096	0.04664	A	C	0.0749	CD19 on PB/PC	TRUE	reported	textfile
rs181547338	2.63e-06	240579362	3657	0.3338	0.07095	A	G	0.0314	CD19 on PB/PC	TRUE	reported	textfile
rs6767669	3.34e-06	116599500	3657	-0.1634	0.0351	A	G	0.1396	CD19 on PB/PC	TRUE	reported	textfile
rs76670160	1.76e-06	54686737	3657	-0.5443	0.1137	T	C	0.0127	CD19 on PB/PC	TRUE	reported	textfile
rs79146843	2.05e-06	165050068	3657	-0.5481	0.1152	A	G	0.0118	CD19 on PB/PC	TRUE	reported	textfile
rs115017263	6.97e-06	55691063	3657	-0.2039	0.04529	T	G	0.0805	CD19 on PB/PC	TRUE	reported	textfile
rs6848130	6.53e-06	81157098	3657	-0.1389	0.03076	C	T	0.2021	CD19 on PB/PC	TRUE	reported	textfile
rs138520806	4.35e-06	3781931	3657	0.2684	0.05834	A	G	0.047	CD19 on PB/PC	TRUE	reported	textfile
rs11748905	2.77e-06	80934634	3657	-0.8732	0.186	C	T	0.0048	CD19 on PB/PC	TRUE	reported	textfile
rs72759977	3.1e-06	53665443	3657	0.1601	0.03427	G	A	0.1492	CD19 on PB/PC	TRUE	reported	textfile
rs117517136	9.7e-06	88548115	3657	0.9896	0.2234	G	A	0.003	CD19 on PB/PC	TRUE	reported	textfile
rs56799059	6.86e-06	130289313	3657	-0.1513	0.03359	A	G	0.1578	CD19 on PB/PC	TRUE	reported	textfile
rs10858826	9.65e-06	89505448	3657	-0.1207	0.02723	A	G	0.2889	CD19 on PB/PC	TRUE	reported	textfile
rs139369230	6.66e-06	106204468	3657	0.5545	0.1229	A	G	0.0104	CD19 on PB/PC	TRUE	reported	textfile
rs7171754	8.66e-06	96281487	3657	0.5431	0.1219	A	T	0.0101	CD19 on PB/PC	TRUE	reported	textfile
rs117491079	6.36e-08	85272300	3657	0.343	0.06329	T	C	0.0391	CD19 on PB/PC	TRUE	reported	textfile
rs9913983	7.95e-06	56001319	3657	-0.2985	0.06674	T	C	0.0334	CD19 on PB/PC	TRUE	reported	textfile
rs740380	2.8e-06	14221680	3657	0.2342	0.04991	T	G	0.0639	CD19 on PB/PC	TRUE	reported	textfile
rs72839309	4.72e-06	66341775	3657	-0.1972	0.04302	G	C	0.0893	CD19 on PB/PC	TRUE	reported	textfile
rs2612375	4.37e-06	73626676	3657	0.1328	0.02886	A	T	0.2379	CD19 on PB/PC	TRUE	reported	textfile
rs9961803	4.75e-06	61174560	3657	-0.1277	0.02787	G	A	0.7398	CD19 on PB/PC	TRUE	reported	textfile
rs78258643	1.8e-07	40527078	3657	0.2575	0.04925	T	A	0.0663	CD19 on PB/PC	TRUE	reported	textfile
rs11701275	1.96e-07	16962765	3657	0.2655	0.05094	G	T	0.0634	CD19 on PB/PC	TRUE	reported	textfile
rs112417310	3.38e-08	206855483	3657	0.4952	0.0895	A	G	0.0201	CD19 on sw mem	TRUE	reported	textfile
rs141619127	5.75e-06	204227546	3657	-0.7701	0.1695	T	C	0.0049	CD19 on sw mem	TRUE	reported	textfile
rs145924813	4.15e-06	28617041	3657	0.3277	0.07109	T	C	0.0327	CD19 on sw mem	TRUE	reported	textfile
rs113812519	3.16e-06	207276336	3657	0.4305	0.09223	G	A	0.0185	CD19 on sw mem	TRUE	reported	textfile
rs80268044	9.94e-06	43810948	3657	0.1481	0.03347	A	G	0.1765	CD19 on sw mem	TRUE	reported	textfile
rs1439005	1.6e-06	61094800	3657	-0.1184	0.02464	C	G	0.4588	CD19 on sw mem	TRUE	reported	textfile
rs7665261	4.93e-06	26464043	3657	-0.7255	0.1586	T	C	0.006	CD19 on sw mem	TRUE	reported	textfile
rs281142	7.55e-06	70969845	3657	0.2326	0.05187	A	G	0.0599	CD19 on sw mem	TRUE	reported	textfile
rs56044553	1.37e-06	173972294	3657	0.1202	0.02484	T	C	0.4832	CD19 on sw mem	TRUE	reported	textfile
rs73275737	8.56e-06	148626837	3657	-0.4528	0.1016	G	C	0.0135	CD19 on sw mem	TRUE	reported	textfile
rs116364947	4.8e-07	36809211	3657	0.5306	0.1052	T	A	0.0134	CD19 on sw mem	TRUE	reported	textfile
rs2281460	3.3e-06	42130300	3657	0.1375	0.02951	A	G	0.2302	CD19 on sw mem	TRUE	reported	textfile
rs9460382	3.16e-06	19564461	3657	-0.2536	0.05433	G	A	0.0509	CD19 on sw mem	TRUE	reported	textfile
rs112126052	7.5e-06	32173757	3657	0.4375	0.09754	A	T	0.0175	CD19 on sw mem	TRUE	reported	textfile
rs2357754	2.23e-06	120164685	3657	-0.1211	0.02555	T	C	0.5934	CD19 on sw mem	TRUE	reported	textfile
rs9368123	8.57e-07	19798682	3657	-0.2466	0.05001	A	G	0.0645	CD19 on sw mem	TRUE	reported	textfile
rs17242358	6.12e-06	129964873	3657	0.1452	0.03205	A	G	0.181	CD19 on sw mem	TRUE	reported	textfile
rs12554848	5.87e-06	36981822	3657	-0.1137	0.02506	C	T	0.4634	CD19 on sw mem	TRUE	reported	textfile
rs560933055	1.33e-06	1717689	3657	-1.305	0.2695	A	T	0.0022	CD19 on sw mem	TRUE	reported	textfile
rs17706571	8.94e-06	29271392	3657	0.439	0.0987	T	C	0.0164	CD19 on sw mem	TRUE	reported	textfile
rs4343243	4.95e-06	77004600	3657	0.1192	0.02606	A	G	0.3644	CD19 on sw mem	TRUE	reported	textfile
rs62059362	8.92e-06	35271879	3657	0.1488	0.03345	T	C	0.1683	CD19 on sw mem	TRUE	reported	textfile
rs77162145	4.57e-06	48885048	3657	0.3247	0.07074	C	T	0.0302	CD19 on sw mem	TRUE	reported	textfile
rs7189927	2.98e-11	28913787	3657	0.167	0.02504	C	T	0.5982	CD19 on sw mem	TRUE	reported	textfile
rs13382005	3.51e-06	58304032	3657	0.1843	0.03966	G	A	0.1065	CD19 on sw mem	TRUE	reported	textfile
rs62124467	2.36e-06	7079452	3657	0.1384	0.02927	T	C	0.2401	CD19 on sw mem	TRUE	reported	textfile
rs78614237	6.96e-06	47459855	3657	0.2298	0.05104	C	G	0.0618	CD19 on sw mem	TRUE	reported	textfile
rs137949497	7.71e-07	32136760	3657	0.5022	0.1014	G	T	0.0146	CD19 on sw mem	TRUE	reported	textfile
rs5762000	5.47e-06	27530934	3657	0.1428	0.03136	T	C	0.1854	CD19 on sw mem	TRUE	reported	textfile
rs113612962	5.13e-08	43167446	3657	-0.3426	0.06276	C	G	0.0402	CD19 on sw mem	TRUE	reported	textfile
rs55712453	8.34e-10	206902437	3657	0.5582	0.0907	G	A	0.0201	CD19 on transitional	TRUE	reported	textfile
rs2026774	3.58e-06	86076069	3657	0.1558	0.03355	C	T	0.8352	CD19 on transitional	TRUE	reported	textfile
rs144743804	2.36e-09	207018206	3657	0.539	0.09004	A	G	0.0197	CD19 on transitional	TRUE	reported	textfile
rs113812519	2.61e-10	207276336	3657	0.5863	0.09251	G	A	0.0185	CD19 on transitional	TRUE	reported	textfile
rs13030427	8.81e-06	208879261	3657	0.1413	0.03174	A	G	0.1957	CD19 on transitional	TRUE	reported	textfile
rs116180572	1.16e-07	61084498	3657	0.1959	0.03689	T	G	0.1325	CD19 on transitional	TRUE	reported	textfile
rs2290055	4.57e-06	108549720	3657	-0.1405	0.03061	G	T	0.2149	CD19 on transitional	TRUE	reported	textfile
rs77953960	6.44e-06	9427816	3657	0.2724	0.06029	T	C	0.0447	CD19 on transitional	TRUE	reported	textfile
rs13164259	3.37e-06	82870211	3657	0.6227	0.1338	A	C	0.0083	CD19 on transitional	TRUE	reported	textfile
rs9459447	3.13e-06	165954369	3657	-0.1392	0.02982	A	C	0.2211	CD19 on transitional	TRUE	reported	textfile
rs12216684	1.23e-06	56291533	3657	0.2634	0.05419	A	G	0.0543	CD19 on transitional	TRUE	reported	textfile
rs35904103	8.12e-06	43734219	3657	2.2	0.4924	A	G	0.0005	CD19 on transitional	TRUE	reported	textfile
rs62519592	9.1e-06	133193809	3657	-0.2118	0.04767	G	A	0.076	CD19 on transitional	TRUE	reported	textfile
rs11825488	4.6e-07	72165045	3657	-1.289	0.2552	A	G	0.0021	CD19 on transitional	TRUE	reported	textfile
rs117442206	7.34e-06	25430787	3657	-0.2627	0.05852	T	C	0.0481	CD19 on transitional	TRUE	reported	textfile
rs115570551	2.72e-06	53874261	3657	0.1722	0.03666	A	G	0.1319	CD19 on transitional	TRUE	reported	textfile
rs935131	5.24e-06	65625991	3657	0.1185	0.02598	A	G	0.3652	CD19 on transitional	TRUE	reported	textfile
rs138920008	3.41e-09	32422808	3657	-1.3	0.2194	C	G	0.0041	CD19 on transitional	TRUE	reported	textfile
rs151295797	3.5e-06	84071182	3657	0.524	0.1128	G	A	0.012	CD19 on transitional	TRUE	reported	textfile
rs28626305	5.18e-06	24921264	3657	-0.1289	0.02824	T	C	0.2648	CD19 on transitional	TRUE	reported	textfile
rs933570	3.41e-06	11760186	3657	-0.1173	0.02522	C	T	0.5816	CD19 on transitional	TRUE	reported	textfile
rs148381451	7.03e-07	63085557	3657	-0.2814	0.05662	T	C	0.0496	CD19 on transitional	TRUE	reported	textfile
rs9949821	4.23e-06	54242149	3657	0.1581	0.03432	A	G	0.1555	CD19 on transitional	TRUE	reported	textfile
rs1667906	3.3e-06	74839524	3657	0.1358	0.02914	G	T	0.2233	CD19 on transitional	TRUE	reported	textfile
rs73146562	7.63e-06	52477220	3657	-0.7762	0.1732	T	C	0.0056	CD19 on transitional	TRUE	reported	textfile
rs117562840	1.53e-06	42680877	3657	-0.7994	0.166	A	G	0.0055	CD19 on transitional	TRUE	reported	textfile
rs113812519	4.29e-09	207276336	3656	0.5404	0.0918	G	A	0.0185	CD19 on unsw mem	TRUE	reported	textfile
rs4649079	1.65e-06	25535823	3656	0.2038	0.04247	T	C	0.0961	CD19 on unsw mem	TRUE	reported	textfile
rs144743804	3.95e-08	207018206	3656	0.4919	0.08935	A	G	0.0197	CD19 on unsw mem	TRUE	reported	textfile
rs55712453	2.02e-10	206902437	3656	0.5735	0.08992	G	A	0.0201	CD19 on unsw mem	TRUE	reported	textfile
rs80268044	6.11e-07	43810948	3656	0.1663	0.03328	A	G	0.1766	CD19 on unsw mem	TRUE	reported	textfile
rs140108418	2.34e-06	13573112	3656	1.97	0.4166	G	A	0.0008	CD19 on unsw mem	TRUE	reported	textfile
rs9814135	5.09e-06	194094110	3656	-0.176	0.03853	C	T	0.8839	CD19 on unsw mem	TRUE	reported	textfile
rs1439005	3.97e-07	61094800	3656	-0.125	0.0246	C	G	0.4587	CD19 on unsw mem	TRUE	reported	textfile
rs4862454	8.85e-06	185816062	3656	-0.1216	0.02732	A	G	0.2981	CD19 on unsw mem	TRUE	reported	textfile
rs7718237	7.88e-06	173972852	3656	0.111	0.0248	A	G	0.4837	CD19 on unsw mem	TRUE	reported	textfile
rs76162621	9.39e-06	68486690	3656	-1.02	0.2298	G	A	0.0027	CD19 on unsw mem	TRUE	reported	textfile
rs764603	1.5e-07	36793516	3656	0.5656	0.1075	C	A	0.0131	CD19 on unsw mem	TRUE	reported	textfile
rs41272381	7.46e-06	133192184	3656	-0.2041	0.04549	G	C	0.0819	CD19 on unsw mem	TRUE	reported	textfile
rs12554596	2.5e-06	37002142	3656	-0.1201	0.02547	G	A	0.3892	CD19 on unsw mem	TRUE	reported	textfile
rs560933055	1.55e-06	1717689	3656	-1.298	0.2698	A	T	0.0022	CD19 on unsw mem	TRUE	reported	textfile
rs76223390	9.01e-06	133434534	3656	-0.1366	0.03072	C	T	0.2157	CD19 on unsw mem	TRUE	reported	textfile
rs149168550	4.81e-06	111354000	3656	0.2262	0.04939	G	C	0.0673	CD19 on unsw mem	TRUE	reported	textfile
rs4942349	6.02e-06	31564105	3656	-0.1195	0.02636	G	A	0.3333	CD19 on unsw mem	TRUE	reported	textfile
rs6575228	7.64e-06	92561395	3656	-0.1114	0.02486	A	G	0.4126	CD19 on unsw mem	TRUE	reported	textfile
rs138920008	3.96e-09	32422808	3656	-1.283	0.2175	C	G	0.0041	CD19 on unsw mem	TRUE	reported	textfile
rs11643297	7.32e-08	28973268	3656	0.1375	0.02549	G	A	0.6109	CD19 on unsw mem	TRUE	reported	textfile
rs148381451	5.77e-06	63085557	3656	-0.2551	0.05618	T	C	0.0496	CD19 on unsw mem	TRUE	reported	textfile
rs149041258	3.81e-06	74408048	3656	-0.2229	0.04815	G	A	0.0759	CD19 on unsw mem	TRUE	reported	textfile
rs72988602	1.06e-06	7114038	3656	0.1801	0.03685	G	A	0.1347	CD19 on unsw mem	TRUE	reported	textfile
rs77697711	5.62e-06	45116977	3656	0.2073	0.04559	A	C	0.081	CD19 on unsw mem	TRUE	reported	textfile
rs113612962	8.8e-07	43167446	3656	-0.3091	0.06276	C	G	0.0402	CD19 on unsw mem	TRUE	reported	textfile
rs529500582	1.01e-06	11620068	3658	-0.4047	0.08262	A	G	0.0254	CD20- %B cell	TRUE	reported	textfile
rs187723151	1.08e-06	242186219	3658	-0.9447	0.1934	A	G	0.004	CD20- %B cell	TRUE	reported	textfile
rs112180455	6.2e-06	221466858	3658	0.3316	0.07326	T	C	0.0299	CD20- %B cell	TRUE	reported	textfile
rs58352426	2.08e-06	154090291	3658	0.1401	0.02947	A	G	0.2246	CD20- %B cell	TRUE	reported	textfile
rs75951284	5.11e-06	187638796	3658	0.3083	0.06752	T	C	0.0316	CD20- %B cell	TRUE	reported	textfile
rs74786971	6.61e-06	90909176	3658	0.2235	0.04952	C	G	0.0645	CD20- %B cell	TRUE	reported	textfile
rs316122	3.97e-06	93014071	3658	0.2993	0.06479	C	G	0.0372	CD20- %B cell	TRUE	reported	textfile
rs9270911	2.1e-06	32572202	3658	0.1364	0.02871	T	C	0.6083	CD20- %B cell	TRUE	reported	textfile
rs9477367	7.46e-06	17249496	3658	-0.1917	0.04273	C	T	0.9097	CD20- %B cell	TRUE	reported	textfile
rs111761453	8.6e-06	137173666	3658	0.2453	0.05506	T	G	0.0524	CD20- %B cell	TRUE	reported	textfile
rs75368642	6.42e-06	150969808	3658	0.2118	0.04687	T	C	0.073	CD20- %B cell	TRUE	reported	textfile
rs7875273	5.83e-06	9023522	3658	0.1137	0.02506	C	T	0.3779	CD20- %B cell	TRUE	reported	textfile
rs118084343	1.03e-06	17687837	3658	-0.2663	0.0544	G	A	0.0547	CD20- %B cell	TRUE	reported	textfile
rs3885787	5.84e-06	92375948	3658	0.2407	0.05303	C	A	0.9422	CD20- %B cell	TRUE	reported	textfile
rs4244568	2.67e-06	39319915	3658	-0.1233	0.02622	G	T	0.3414	CD20- %B cell	TRUE	reported	textfile
rs140134875	1.64e-06	80306120	3658	-1.694	0.3528	A	C	0.0011	CD20- %B cell	TRUE	reported	textfile
rs4889373	7.06e-06	81747602	3658	-0.1372	0.03051	G	A	0.7989	CD20- %B cell	TRUE	reported	textfile
rs2107459	4.18e-06	74140113	3658	0.2021	0.04383	A	C	0.0853	CD20- %B cell	TRUE	reported	textfile
rs7265879	2.36e-06	6103341	3658	-0.2182	0.04616	G	C	0.0778	CD20- %B cell	TRUE	reported	textfile
rs57840701	5.65e-06	46686437	3658	0.4562	0.1004	C	A	0.015	CD20- %B cell	TRUE	reported	textfile
rs6712095	4.71e-06	205623497	3657	0.3643	0.07946	T	G	0.0246	CD20- %lymphocyte	TRUE	reported	textfile
rs34625183	7.91e-06	146097919	3657	-0.1695	0.03789	T	C	0.1154	CD20- %lymphocyte	TRUE	reported	textfile
rs75951284	6.12e-06	187638796	3657	0.3067	0.06772	T	C	0.0316	CD20- %lymphocyte	TRUE	reported	textfile
rs186229706	3.97e-06	2029089	3657	0.4826	0.1045	T	G	0.0142	CD20- %lymphocyte	TRUE	reported	textfile
rs4647601	7.83e-06	185570032	3657	0.1097	0.02451	A	C	0.4584	CD20- %lymphocyte	TRUE	reported	textfile
rs72791978	7.85e-06	108070072	3657	0.5621	0.1256	T	A	0.01	CD20- %lymphocyte	TRUE	reported	textfile
rs9273241	1.61e-07	32614025	3657	0.179	0.0341	T	C	0.5975	CD20- %lymphocyte	TRUE	reported	textfile
rs7773849	5.81e-08	128553518	3657	1.534	0.2821	G	A	0.0018	CD20- %lymphocyte	TRUE	reported	textfile
rs13244540	6.38e-06	151002534	3657	0.2658	0.0588	T	G	0.0447	CD20- %lymphocyte	TRUE	reported	textfile
rs38201	8.97e-06	15911408	3657	-0.1242	0.02794	A	T	0.2594	CD20- %lymphocyte	TRUE	reported	textfile
rs34313582	5.4e-06	84919811	3657	-0.1598	0.03507	A	C	0.138	CD20- %lymphocyte	TRUE	reported	textfile
rs72825207	1.38e-06	62909955	3657	0.513	0.1061	A	T	0.0149	CD20- %lymphocyte	TRUE	reported	textfile
rs147937648	3.02e-06	82008771	3657	-0.7403	0.1583	T	C	0.0059	CD20- %lymphocyte	TRUE	reported	textfile
rs77553819	3e-06	24882401	3657	-0.1257	0.02688	C	G	0.2863	CD20- %lymphocyte	TRUE	reported	textfile
rs12432015	4.57e-06	49052782	3657	-0.1712	0.0373	C	T	0.118	CD20- %lymphocyte	TRUE	reported	textfile
rs4244568	1.99e-06	39319915	3657	-0.1244	0.02611	G	T	0.3414	CD20- %lymphocyte	TRUE	reported	textfile
rs252294	8.41e-06	29235533	3657	0.1079	0.02418	C	G	0.5648	CD20- %lymphocyte	TRUE	reported	textfile
rs4782702	3.15e-06	85477299	3657	0.4085	0.0875	G	A	0.9802	CD20- %lymphocyte	TRUE	reported	textfile
rs11662133	6.52e-06	74434633	3657	0.1453	0.03219	C	T	0.1705	CD20- %lymphocyte	TRUE	reported	textfile
rs186355283	8.27e-06	46615708	3657	0.6312	0.1414	T	C	0.0077	CD20- %lymphocyte	TRUE	reported	textfile
rs6052993	4.25e-06	4944838	3657	-0.1132	0.02459	G	C	0.4371	CD20- %lymphocyte	TRUE	reported	textfile
rs6712095	6.32e-06	205623497	3657	0.3592	0.07943	T	G	0.0246	CD20- AC	TRUE	reported	textfile
rs57641238	1.48e-07	75536553	3657	-0.1546	0.02937	C	G	0.2252	CD20- AC	TRUE	reported	textfile
rs34625183	8.03e-06	146097919	3657	-0.1694	0.03789	T	C	0.1154	CD20- AC	TRUE	reported	textfile
rs36123742	4.11e-06	133253719	3657	0.1193	0.02587	T	A	0.6555	CD20- AC	TRUE	reported	textfile
rs74786971	2.03e-06	90909176	3657	0.2348	0.04935	C	G	0.0645	CD20- AC	TRUE	reported	textfile
rs116699251	3.24e-06	142419461	3657	-0.2732	0.05861	A	G	0.0446	CD20- AC	TRUE	reported	textfile
rs41494	6.26e-06	9688280	3657	1.728	0.3819	T	A	0.999	CD20- AC	TRUE	reported	textfile
rs7773849	8.31e-08	128553518	3657	1.508	0.2808	G	A	0.0018	CD20- AC	TRUE	reported	textfile
rs9273241	3.17e-07	32614025	3657	0.177	0.03455	T	C	0.5975	CD20- AC	TRUE	reported	textfile
rs2102662	9.78e-06	56828069	3657	0.1274	0.02877	A	G	0.7447	CD20- AC	TRUE	reported	textfile
rs111761453	5.77e-06	137173666	3657	0.249	0.05482	T	G	0.0524	CD20- AC	TRUE	reported	textfile
rs38182	3.21e-06	15900650	3657	-0.1541	0.03305	T	C	0.1693	CD20- AC	TRUE	reported	textfile
rs6586822	4.35e-06	19139514	3657	-0.1182	0.02568	C	T	0.6508	CD20- AC	TRUE	reported	textfile
rs6482467	9.72e-06	25320223	3657	-0.1128	0.02546	G	A	0.3646	CD20- AC	TRUE	reported	textfile
rs16936840	3.5e-06	19531128	3657	0.1881	0.04049	T	C	0.102	CD20- AC	TRUE	reported	textfile
rs2212443	6.08e-06	88131197	3657	-0.1412	0.03117	G	T	0.8048	CD20- AC	TRUE	reported	textfile
rs12146943	6.51e-06	21076875	3657	-0.1127	0.02495	A	G	0.3704	CD20- AC	TRUE	reported	textfile
rs77553819	3.52e-06	24882401	3657	-0.1249	0.0269	C	G	0.2863	CD20- AC	TRUE	reported	textfile
rs71431666	3.49e-06	95266847	3657	-0.1932	0.04158	C	G	0.0946	CD20- AC	TRUE	reported	textfile
rs252298	6.61e-06	29232967	3657	0.1091	0.02419	A	G	0.5643	CD20- AC	TRUE	reported	textfile
rs56736306	5.92e-06	87840577	3657	-0.1465	0.03231	G	C	0.1719	CD20- AC	TRUE	reported	textfile
rs2637364	3.75e-06	32078878	3657	-0.1164	0.02513	C	T	0.6221	CD20- AC	TRUE	reported	textfile
rs6029245	3.23e-06	39267990	3657	0.3071	0.06585	C	T	0.0358	CD20- AC	TRUE	reported	textfile
rs6052993	5.17e-06	4944838	3657	-0.1123	0.0246	G	C	0.4371	CD20- AC	TRUE	reported	textfile
rs6008703	9.67e-06	48837650	3657	-0.1147	0.02589	C	G	0.3131	CD20- AC	TRUE	reported	textfile
rs75839951	1.93e-06	34491589	3659	-0.2476	0.05192	G	T	0.0585	CD20- CD38- %B cell	TRUE	reported	textfile
rs4832496	6.54e-06	17752538	3659	0.127	0.02814	A	G	0.236	CD20- CD38- %B cell	TRUE	reported	textfile
rs141595421	8.62e-06	63492195	3659	-0.4902	0.11	G	T	0.0127	CD20- CD38- %B cell	TRUE	reported	textfile
rs396692	6e-06	163553861	3659	0.1157	0.02552	A	G	0.6682	CD20- CD38- %B cell	TRUE	reported	textfile
rs182720746	2.01e-06	113092883	3659	0.6255	0.1314	T	C	0.0089	CD20- CD38- %B cell	TRUE	reported	textfile
rs2215848	3.07e-06	25065221	3659	0.524	0.1121	A	G	0.0118	CD20- CD38- %B cell	TRUE	reported	textfile
rs62311900	9.86e-06	74145187	3659	-0.1398	0.03159	T	C	0.1735	CD20- CD38- %B cell	TRUE	reported	textfile
rs2339996	3.12e-07	173070505	3659	-0.1471	0.0287	A	G	0.7803	CD20- CD38- %B cell	TRUE	reported	textfile
rs13176237	9.12e-06	42353044	3659	0.2113	0.04756	G	A	0.0696	CD20- CD38- %B cell	TRUE	reported	textfile
rs72492305	4.19e-07	32509333	3659	0.2125	0.04192	T	C	0.6663	CD20- CD38- %B cell	TRUE	reported	textfile
rs56284619	5.72e-06	90013983	3659	0.1557	0.03428	T	C	0.1469	CD20- CD38- %B cell	TRUE	reported	textfile
rs10988372	6.77e-06	132193568	3659	0.1351	0.02998	C	G	0.2044	CD20- CD38- %B cell	TRUE	reported	textfile
rs118073973	5.45e-06	19948908	3659	0.2799	0.06148	A	T	0.0402	CD20- CD38- %B cell	TRUE	reported	textfile
rs72652459	9.2e-06	22099416	3659	-1.505	0.3389	T	C	0.0012	CD20- CD38- %B cell	TRUE	reported	textfile
rs55767134	2.9e-06	17048435	3659	-0.1463	0.03122	C	G	0.1838	CD20- CD38- %B cell	TRUE	reported	textfile
rs34666228	1.46e-06	123385425	3659	0.1355	0.02809	T	G	0.2346	CD20- CD38- %B cell	TRUE	reported	textfile
rs78301150	1.42e-06	82233392	3659	-1.069	0.2213	A	G	0.0033	CD20- CD38- %B cell	TRUE	reported	textfile
rs55897487	3.73e-06	261706	3659	-1.342	0.2897	T	C	0.0016	CD20- CD38- %B cell	TRUE	reported	textfile
rs117308259	2.48e-08	31993501	3659	-0.8348	0.1494	C	T	0.0066	CD20- CD38- %B cell	TRUE	reported	textfile
rs17099538	3.09e-06	33254318	3659	-0.2409	0.05156	C	T	0.0559	CD20- CD38- %B cell	TRUE	reported	textfile
rs77911577	8.79e-06	28669022	3659	-0.2551	0.05732	C	A	0.05	CD20- CD38- %B cell	TRUE	reported	textfile
rs2113943	9.1e-06	60895636	3659	0.1278	0.02875	G	A	0.2288	CD20- CD38- %B cell	TRUE	reported	textfile
rs35639639	8.6e-06	5488091	3659	0.1332	0.0299	C	T	0.2062	CD20- CD38- %B cell	TRUE	reported	textfile
rs16955339	2.57e-06	52971060	3659	0.293	0.06221	T	G	0.0377	CD20- CD38- %B cell	TRUE	reported	textfile
rs36071180	8.08e-06	765164	3659	0.1488	0.03329	A	G	0.1596	CD20- CD38- %B cell	TRUE	reported	textfile
rs6125184	1.55e-06	46576714	3659	-0.1186	0.02463	A	G	0.5914	CD20- CD38- %B cell	TRUE	reported	textfile
rs75839951	2.38e-06	34491589	3658	-0.2457	0.05199	G	T	0.0585	CD20- CD38- %lymphocyte	TRUE	reported	textfile
rs4619804	8.78e-06	18674644	3658	0.1217	0.02734	C	A	0.6963	CD20- CD38- %lymphocyte	TRUE	reported	textfile
rs709082	6.04e-06	191447446	3658	0.1135	0.02504	C	A	0.3682	CD20- CD38- %lymphocyte	TRUE	reported	textfile
rs2215848	7.41e-06	25065221	3658	0.5046	0.1124	A	G	0.0118	CD20- CD38- %lymphocyte	TRUE	reported	textfile
rs182720746	1.89e-06	113092883	3658	0.6295	0.1319	T	C	0.0089	CD20- CD38- %lymphocyte	TRUE	reported	textfile
rs62311900	9.44e-06	74145187	3658	-0.1405	0.03168	T	C	0.1736	CD20- CD38- %lymphocyte	TRUE	reported	textfile
rs2339996	3.12e-07	173070505	3658	-0.1476	0.02879	A	G	0.7802	CD20- CD38- %lymphocyte	TRUE	reported	textfile
rs72492305	1.22e-06	32509333	3658	0.2022	0.0416	T	C	0.6662	CD20- CD38- %lymphocyte	TRUE	reported	textfile
rs6906886	8.55e-06	85038851	3658	0.1807	0.04053	A	T	0.903	CD20- CD38- %lymphocyte	TRUE	reported	textfile
rs10279688	6.54e-06	9851008	3658	0.4968	0.1101	T	C	0.0115	CD20- CD38- %lymphocyte	TRUE	reported	textfile
rs11203884	6.84e-06	17516564	3658	-0.1469	0.03262	T	C	0.1643	CD20- CD38- %lymphocyte	TRUE	reported	textfile
rs118073973	2.21e-06	19948908	3658	0.2924	0.06168	A	T	0.0402	CD20- CD38- %lymphocyte	TRUE	reported	textfile
rs55767134	4.19e-06	17048435	3658	-0.1443	0.03132	C	G	0.1837	CD20- CD38- %lymphocyte	TRUE	reported	textfile
rs308820	8.97e-06	88142031	3658	-0.1261	0.02837	C	T	0.7571	CD20- CD38- %lymphocyte	TRUE	reported	textfile
rs34666228	8.46e-08	123385425	3658	0.1512	0.02817	T	G	0.2346	CD20- CD38- %lymphocyte	TRUE	reported	textfile
rs78301150	3.85e-06	82233392	3658	-1.031	0.2228	A	G	0.0033	CD20- CD38- %lymphocyte	TRUE	reported	textfile
rs117308259	4.02e-07	31993501	3658	-0.7613	0.1499	C	T	0.0066	CD20- CD38- %lymphocyte	TRUE	reported	textfile
rs35639639	6.72e-06	5488091	3658	0.1354	0.03002	C	T	0.2063	CD20- CD38- %lymphocyte	TRUE	reported	textfile
rs111737298	7.01e-06	52847291	3658	0.2263	0.05029	G	A	0.0596	CD20- CD38- %lymphocyte	TRUE	reported	textfile
rs16955339	8.46e-07	52971060	3658	0.3075	0.06234	T	G	0.0377	CD20- CD38- %lymphocyte	TRUE	reported	textfile
rs77510701	3.92e-06	34838106	3658	-0.2605	0.05636	A	C	0.0484	CD20- CD38- %lymphocyte	TRUE	reported	textfile
rs80339814	2.08e-06	53396009	3658	-0.2259	0.04752	C	T	0.0794	CD20- CD38- %lymphocyte	TRUE	reported	textfile
rs6125184	2.61e-06	46576714	3658	-0.1164	0.02472	A	G	0.5914	CD20- CD38- %lymphocyte	TRUE	reported	textfile
rs59902361	5.54e-06	38334734	3658	-0.2517	0.05532	A	G	0.0496	CD20- CD38- %lymphocyte	TRUE	reported	textfile
rs36071180	3.19e-06	765164	3658	0.1556	0.03334	A	G	0.1597	CD20- CD38- %lymphocyte	TRUE	reported	textfile
rs182720746	5.38e-06	113092883	3658	0.6026	0.1323	T	C	0.0089	CD20- CD38- AC	TRUE	reported	textfile
rs62311900	1.34e-06	74145187	3658	-0.1537	0.03175	T	C	0.1736	CD20- CD38- AC	TRUE	reported	textfile
rs2339996	6.6e-07	173070505	3658	-0.1438	0.02887	A	G	0.7802	CD20- CD38- AC	TRUE	reported	textfile
rs72492305	4.25e-07	32509333	3658	0.2112	0.04169	T	C	0.6662	CD20- CD38- AC	TRUE	reported	textfile
rs6906886	3.29e-06	85038851	3658	0.1893	0.04063	A	T	0.903	CD20- CD38- AC	TRUE	reported	textfile
rs11203884	2.27e-06	17516564	3658	-0.1548	0.03269	T	C	0.1643	CD20- CD38- AC	TRUE	reported	textfile
rs10988372	4.09e-06	132193568	3658	0.139	0.03012	C	G	0.2045	CD20- CD38- AC	TRUE	reported	textfile
rs118073973	2.87e-06	19948908	3658	0.2899	0.06184	A	T	0.0402	CD20- CD38- AC	TRUE	reported	textfile
rs75609575	3.45e-06	97639659	3658	-0.3072	0.06608	A	G	0.0349	CD20- CD38- AC	TRUE	reported	textfile
rs308820	4.63e-06	88142031	3658	-0.1305	0.02844	C	T	0.7571	CD20- CD38- AC	TRUE	reported	textfile
rs61906277	3.99e-07	123384801	3658	0.1435	0.02825	G	A	0.2347	CD20- CD38- AC	TRUE	reported	textfile
rs117308259	4.4e-06	31993501	3658	-0.6917	0.1504	C	T	0.0066	CD20- CD38- AC	TRUE	reported	textfile
rs16955339	7.67e-07	52971060	3658	0.3095	0.06249	T	G	0.0377	CD20- CD38- AC	TRUE	reported	textfile
rs77510701	6.74e-06	34838106	3658	-0.2548	0.05651	A	C	0.0484	CD20- CD38- AC	TRUE	reported	textfile
rs80339814	8.02e-06	53396009	3658	-0.2131	0.04766	C	T	0.0794	CD20- CD38- AC	TRUE	reported	textfile
rs6125184	9.6e-06	46576714	3658	-0.1099	0.02479	A	G	0.5914	CD20- CD38- AC	TRUE	reported	textfile
rs36071180	7.7e-06	765164	3658	0.1498	0.03344	A	G	0.1597	CD20- CD38- AC	TRUE	reported	textfile
rs113371046	6.3e-06	17595034	3660	0.2296	0.05076	A	G	0.0638	CD20 on B cell	TRUE	reported	textfile
rs79003098	4.61e-06	81965038	3660	-0.1544	0.03365	A	T	0.1589	CD20 on B cell	TRUE	reported	textfile
rs187188344	2.65e-06	178858731	3660	0.3678	0.07821	G	C	0.0269	CD20 on B cell	TRUE	reported	textfile
rs78296478	6.77e-06	125069044	3660	0.4003	0.08882	A	C	0.0193	CD20 on B cell	TRUE	reported	textfile
rs75097128	1.01e-06	113292746	3660	-0.4658	0.09509	G	A	0.0164	CD20 on B cell	TRUE	reported	textfile
rs13109614	7.39e-06	62019413	3660	0.1321	0.02942	G	A	0.2333	CD20 on B cell	TRUE	reported	textfile
rs28620974	9.54e-06	137463130	3660	0.2243	0.05059	C	G	0.0635	CD20 on B cell	TRUE	reported	textfile
rs73245560	9.7e-06	43987474	3660	0.4108	0.09274	C	T	0.0182	CD20 on B cell	TRUE	reported	textfile
rs80155794	4.52e-06	178957291	3660	-0.3406	0.07416	A	G	0.0266	CD20 on B cell	TRUE	reported	textfile
rs3933208	2.97e-06	161458204	3660	0.1183	0.02527	A	T	0.4126	CD20 on B cell	TRUE	reported	textfile
rs77612075	1.29e-06	162820460	3660	0.3491	0.07197	T	C	0.0292	CD20 on B cell	TRUE	reported	textfile
rs72836542	8.01e-07	14091682	3660	0.1332	0.02695	T	C	0.3163	CD20 on B cell	TRUE	reported	textfile
rs9277628	4.43e-06	33082040	3660	0.1481	0.03221	C	A	0.2042	CD20 on B cell	TRUE	reported	textfile
rs9375555	5.56e-06	128547994	3660	-1.641	0.3607	A	G	0.0011	CD20 on B cell	TRUE	reported	textfile
rs233495	2.71e-06	14806317	3660	-0.1168	0.02485	T	C	0.5585	CD20 on B cell	TRUE	reported	textfile
rs6901175	3.5e-07	32198527	3660	0.1648	0.03229	A	G	0.2235	CD20 on B cell	TRUE	reported	textfile
rs35139284	3.55e-10	32561370	3660	0.183	0.02909	T	C	0.401	CD20 on B cell	TRUE	reported	textfile
rs12212931	3.02e-11	15913304	3660	0.2121	0.03182	G	T	0.8197	CD20 on B cell	TRUE	reported	textfile
rs2975021	7.13e-07	29878559	3660	0.1513	0.03046	A	G	0.3522	CD20 on B cell	TRUE	reported	textfile
rs388354	7.5e-07	40190449	3660	-0.1212	0.02446	C	A	0.5205	CD20 on B cell	TRUE	reported	textfile
rs75071948	9.45e-06	75768836	3660	0.2626	0.05919	G	T	0.0452	CD20 on B cell	TRUE	reported	textfile
rs1941018	4.63e-13	60268994	3660	-0.1808	0.02489	G	A	0.6079	CD20 on B cell	TRUE	reported	textfile
rs143129208	5.65e-06	99391820	3660	1.055	0.232	G	A	0.0025	CD20 on B cell	TRUE	reported	textfile
rs11051833	1.25e-06	32330242	3660	-0.359	0.07394	T	C	0.0286	CD20 on B cell	TRUE	reported	textfile
rs4768810	7.73e-06	47866824	3660	0.2022	0.04515	T	C	0.0821	CD20 on B cell	TRUE	reported	textfile
rs6496328	2.06e-06	86988686	3660	-0.3019	0.0635	T	C	0.0387	CD20 on B cell	TRUE	reported	textfile
rs8025257	3.51e-06	89600226	3660	-0.1367	0.02943	C	T	0.2286	CD20 on B cell	TRUE	reported	textfile
rs354026	1.12e-11	49841054	3660	0.1996	0.0293	T	G	0.7669	CD20 on B cell	TRUE	reported	textfile
rs2861007	9.03e-07	66306389	3606	-0.1207	0.02452	T	A	0.5756	CD20 on CD20- CD38-	TRUE	reported	textfile
rs73015549	4.04e-06	7495328	3606	0.2735	0.05925	G	C	0.046	CD20 on CD20- CD38-	TRUE	reported	textfile
rs572468	2.21e-06	13993465	3606	-0.1174	0.02477	G	C	0.4893	CD20 on CD20- CD38-	TRUE	reported	textfile
rs116559476	2.14e-06	180025316	3606	-0.8919	0.1879	A	G	0.004	CD20 on CD20- CD38-	TRUE	reported	textfile
rs4921509	8.8e-06	159000854	3606	-0.112	0.02517	C	G	0.6187	CD20 on CD20- CD38-	TRUE	reported	textfile
rs79248632	7.96e-06	158319820	3606	-0.2045	0.04571	T	C	0.0799	CD20 on CD20- CD38-	TRUE	reported	textfile
rs1558186	9.32e-06	133041544	3606	-0.1098	0.02473	A	G	0.4377	CD20 on CD20- CD38-	TRUE	reported	textfile
rs34280838	7.12e-07	32139565	3606	-0.1648	0.03318	C	T	0.1735	CD20 on CD20- CD38-	TRUE	reported	textfile
rs6930288	3.59e-06	29098881	3606	-0.1506	0.03245	T	A	0.1938	CD20 on CD20- CD38-	TRUE	reported	textfile
rs2188517	8.77e-06	90108278	3606	0.112	0.02516	A	G	0.3921	CD20 on CD20- CD38-	TRUE	reported	textfile
rs41329345	8.38e-07	48456925	3606	-0.1267	0.02568	C	T	0.3636	CD20 on CD20- CD38-	TRUE	reported	textfile
rs2243879	5.61e-06	35622558	3606	-0.1134	0.02493	C	G	0.5732	CD20 on CD20- CD38-	TRUE	reported	textfile
rs35857670	9.86e-06	82607555	3606	0.1754	0.03963	A	G	0.1104	CD20 on CD20- CD38-	TRUE	reported	textfile
rs1318389	4.94e-06	35149649	3606	0.3135	0.06855	C	A	0.9664	CD20 on CD20- CD38-	TRUE	reported	textfile
rs145619091	7.91e-06	4261253	3606	0.3296	0.07367	C	G	0.0294	CD20 on CD20- CD38-	TRUE	reported	textfile
rs12952217	9.78e-06	1018426	3606	-0.1326	0.02994	G	C	0.2121	CD20 on CD20- CD38-	TRUE	reported	textfile
rs12977515	9.11e-06	16391727	3606	0.2986	0.06719	T	G	0.0352	CD20 on CD20- CD38-	TRUE	reported	textfile
rs10426452	4.64e-06	49907690	3606	-0.115	0.02506	A	G	0.3816	CD20 on CD20- CD38-	TRUE	reported	textfile
rs5997212	8.07e-06	27679924	3606	-0.2309	0.05166	A	T	0.062	CD20 on CD20- CD38-	TRUE	reported	textfile
rs187188344	2.73e-06	178858731	3657	0.3659	0.07788	G	C	0.0269	CD20 on CD24+ CD27+	TRUE	reported	textfile
rs13080324	7.45e-06	111952407	3657	0.1124	0.02505	A	C	0.4322	CD20 on CD24+ CD27+	TRUE	reported	textfile
rs149204679	5.94e-06	27240644	3657	-1.321	0.2913	G	A	0.0018	CD20 on CD24+ CD27+	TRUE	reported	textfile
rs62340965	1.45e-06	190508875	3657	-0.1508	0.03126	A	T	0.2158	CD20 on CD24+ CD27+	TRUE	reported	textfile
rs2114442	1.57e-06	100832060	3657	0.1204	0.02503	T	C	0.5751	CD20 on CD24+ CD27+	TRUE	reported	textfile
rs77612075	6.05e-06	162820460	3657	0.3243	0.07158	T	C	0.0293	CD20 on CD24+ CD27+	TRUE	reported	textfile
rs114915558	7.44e-06	98564385	3657	0.2952	0.06578	G	A	0.0384	CD20 on CD24+ CD27+	TRUE	reported	textfile
rs295654	7.89e-06	58107171	3657	0.1139	0.02545	T	C	0.6113	CD20 on CD24+ CD27+	TRUE	reported	textfile
rs6459417	7.67e-09	15858996	3657	0.2138	0.03693	T	C	0.8737	CD20 on CD24+ CD27+	TRUE	reported	textfile
rs9400057	1.88e-06	107162216	3657	0.256	0.05363	A	G	0.0567	CD20 on CD24+ CD27+	TRUE	reported	textfile
rs111259171	1.38e-08	32640351	3657	0.2545	0.04474	G	A	0.1947	CD20 on CD24+ CD27+	TRUE	reported	textfile
rs12196019	2.27e-07	31005483	3657	0.2387	0.04602	A	C	0.1117	CD20 on CD24+ CD27+	TRUE	reported	textfile
rs9461557	1.32e-08	29765925	3657	0.2943	0.05167	T	C	0.1124	CD20 on CD24+ CD27+	TRUE	reported	textfile
rs6922309	9.16e-08	31321238	3657	0.2142	0.04001	C	G	0.1468	CD20 on CD24+ CD27+	TRUE	reported	textfile
rs12554596	4.39e-06	37002142	3657	-0.1172	0.02548	G	A	0.3891	CD20 on CD24+ CD27+	TRUE	reported	textfile
rs7035906	7.74e-06	95898832	3657	0.2833	0.06325	A	G	0.0416	CD20 on CD24+ CD27+	TRUE	reported	textfile
rs75071948	5.35e-06	75768836	3657	0.2686	0.05894	G	T	0.0453	CD20 on CD24+ CD27+	TRUE	reported	textfile
rs78850316	7.34e-06	99560231	3657	-0.3566	0.07941	T	C	0.025	CD20 on CD24+ CD27+	TRUE	reported	textfile
rs11187166	3.07e-08	94516008	3657	0.1756	0.03165	T	C	0.1993	CD20 on CD24+ CD27+	TRUE	reported	textfile
rs74621542	1.03e-11	60166613	3657	-0.2878	0.04216	C	T	0.0917	CD20 on CD24+ CD27+	TRUE	reported	textfile
rs7128035	1.68e-06	268078	3657	-0.1306	0.02723	C	T	0.7107	CD20 on CD24+ CD27+	TRUE	reported	textfile
rs149695230	2.27e-06	60288804	3657	0.1899	0.04009	G	T	0.1079	CD20 on CD24+ CD27+	TRUE	reported	textfile
rs111896387	8.28e-06	45116844	3657	0.2156	0.04829	T	C	0.0786	CD20 on CD24+ CD27+	TRUE	reported	textfile
rs2578469	5.91e-06	4101401	3657	-0.117	0.02578	A	G	0.3246	CD20 on CD24+ CD27+	TRUE	reported	textfile
rs61958965	6.78e-06	72232674	3657	-0.3982	0.08835	T	C	0.0198	CD20 on CD24+ CD27+	TRUE	reported	textfile
rs149214933	1.87e-06	64174465	3657	-0.782	0.1638	G	T	0.0062	CD20 on CD24+ CD27+	TRUE	reported	textfile
rs62000215	3.82e-06	31184858	3657	-0.8478	0.1832	T	C	0.0049	CD20 on CD24+ CD27+	TRUE	reported	textfile
rs141211110	7.13e-06	61118647	3657	0.7689	0.171	T	C	0.0051	CD20 on CD24+ CD27+	TRUE	reported	textfile
rs179212	2.88e-06	19308868	3657	-0.2158	0.04605	C	T	0.0772	CD20 on CD24+ CD27+	TRUE	reported	textfile
rs141121779	1.91e-06	49998328	3657	0.2393	0.05016	A	G	0.0647	CD20 on CD24+ CD27+	TRUE	reported	textfile
rs61731791	1.2e-07	50940778	3657	0.2236	0.04215	T	C	0.0972	CD20 on CD24+ CD27+	TRUE	reported	textfile
rs55809481	8.18e-23	49872521	3657	-0.283	0.0286	C	T	0.2425	CD20 on CD24+ CD27+	TRUE	reported	textfile
rs77463781	4.8e-06	79464773	3657	0.1693	0.03696	C	G	0.134	CD20 on IgD- CD24-	TRUE	reported	textfile
rs74435765	4.89e-06	185522944	3657	-0.3934	0.08597	T	C	0.0217	CD20 on IgD- CD24-	TRUE	reported	textfile
rs849532	5.7e-08	206552726	3657	0.3351	0.0616	G	A	0.9579	CD20 on IgD- CD24-	TRUE	reported	textfile
rs10171238	1.86e-06	149568729	3657	0.1442	0.0302	T	C	0.7912	CD20 on IgD- CD24-	TRUE	reported	textfile
rs7617301	5.38e-06	119289916	3657	0.174	0.0382	C	A	0.124	CD20 on IgD- CD24-	TRUE	reported	textfile
rs62299189	3.9e-06	43192979	3657	-0.2121	0.04588	C	A	0.0804	CD20 on IgD- CD24-	TRUE	reported	textfile
rs4426778	9.87e-07	102780724	3657	-0.1237	0.02524	A	G	0.4558	CD20 on IgD- CD24-	TRUE	reported	textfile
rs78373541	4.78e-06	139616732	3657	0.2667	0.05821	G	A	0.0472	CD20 on IgD- CD24-	TRUE	reported	textfile
rs73196454	8.24e-06	105783715	3657	-1.601	0.3586	A	G	0.001	CD20 on IgD- CD24-	TRUE	reported	textfile
rs13181744	6.17e-06	120594915	3657	-0.1152	0.02545	C	T	0.4002	CD20 on IgD- CD24-	TRUE	reported	textfile
rs12660382	3e-06	31443323	3657	0.1358	0.02903	T	C	0.3149	CD20 on IgD- CD24-	TRUE	reported	textfile
rs6454789	9.14e-06	90677176	3657	0.1147	0.02581	T	C	0.6224	CD20 on IgD- CD24-	TRUE	reported	textfile
rs7754613	2.52e-06	15902888	3657	0.1526	0.03238	T	C	0.8203	CD20 on IgD- CD24-	TRUE	reported	textfile
rs11751198	1.03e-07	31753526	3657	0.1933	0.03626	A	G	0.1839	CD20 on IgD- CD24-	TRUE	reported	textfile
rs35567463	3.02e-09	32633970	3657	0.1709	0.02875	A	C	0.3506	CD20 on IgD- CD24-	TRUE	reported	textfile
rs35485457	9.94e-06	78679087	3657	-0.1404	0.03173	T	G	0.1962	CD20 on IgD- CD24-	TRUE	reported	textfile
rs117961939	6.5e-06	132476096	3657	-0.3034	0.06719	T	C	0.0347	CD20 on IgD- CD24-	TRUE	reported	textfile
rs1838178	7.4e-06	92858976	3657	0.1146	0.02554	G	A	0.4009	CD20 on IgD- CD24-	TRUE	reported	textfile
rs787045	8.7e-06	26831337	3657	-0.1629	0.03657	C	G	0.1298	CD20 on IgD- CD24-	TRUE	reported	textfile
rs61884722	2.65e-06	18601510	3657	0.9074	0.1929	C	T	0.0041	CD20 on IgD- CD24-	TRUE	reported	textfile
rs78287249	6.55e-06	60157281	3657	-0.1865	0.04132	T	G	0.0971	CD20 on IgD- CD24-	TRUE	reported	textfile
rs11051833	5.03e-06	32330242	3657	-0.3389	0.07414	T	C	0.0286	CD20 on IgD- CD24-	TRUE	reported	textfile
rs1453509	9.53e-06	17014673	3657	-0.1691	0.03813	A	C	0.1183	CD20 on IgD- CD24-	TRUE	reported	textfile
rs17136624	5.3e-06	3996282	3657	-0.1293	0.02835	A	G	0.2546	CD20 on IgD- CD24-	TRUE	reported	textfile
rs139713744	8.09e-06	30608982	3657	1.747	0.3908	T	C	0.001	CD20 on IgD- CD24-	TRUE	reported	textfile
rs542436617	5.45e-06	21246554	3657	1.484	0.3259	A	G	0.0014	CD20 on IgD- CD24-	TRUE	reported	textfile
rs13381717	7.34e-06	352095	3657	-0.2077	0.04625	T	A	0.0774	CD20 on IgD- CD24-	TRUE	reported	textfile
rs30006	3.03e-11	49847916	3657	-0.196	0.02941	C	T	0.2335	CD20 on IgD- CD24-	TRUE	reported	textfile
rs61731791	2.15e-06	50940778	3657	0.2019	0.04254	T	C	0.0972	CD20 on IgD- CD24-	TRUE	reported	textfile
rs116144119	3e-06	165812513	3657	0.265	0.05664	A	G	0.0533	CD20 on IgD- CD27-	TRUE	reported	textfile
rs34713734	1.86e-06	122564113	3657	0.1619	0.0339	A	C	0.1533	CD20 on IgD- CD27-	TRUE	reported	textfile
rs10171238	7.88e-06	149568729	3657	0.1346	0.03008	T	C	0.7912	CD20 on IgD- CD27-	TRUE	reported	textfile
rs7608595	1.99e-06	223088415	3657	0.1244	0.02612	C	T	0.6675	CD20 on IgD- CD27-	TRUE	reported	textfile
rs74812685	3.69e-07	2654756	3657	0.2667	0.05235	T	A	0.0602	CD20 on IgD- CD27-	TRUE	reported	textfile
rs160509	6.64e-06	9588308	3657	-0.2333	0.05172	C	T	0.9407	CD20 on IgD- CD27-	TRUE	reported	textfile
rs4716010	2.24e-09	15898371	3657	0.1924	0.0321	A	G	0.8194	CD20 on IgD- CD27-	TRUE	reported	textfile
rs1838178	1.21e-06	92858976	3657	0.1236	0.02543	G	A	0.4009	CD20 on IgD- CD27-	TRUE	reported	textfile
rs10901783	8.54e-06	126294501	3657	0.1297	0.02911	C	T	0.2361	CD20 on IgD- CD27-	TRUE	reported	textfile
rs787045	9.35e-06	26831337	3657	-0.1616	0.03642	C	G	0.1298	CD20 on IgD- CD27-	TRUE	reported	textfile
rs2493367	7.69e-06	66219102	3657	-0.3325	0.07422	A	T	0.9706	CD20 on IgD- CD27-	TRUE	reported	textfile
rs61884722	2.13e-06	18601510	3657	0.9116	0.192	C	T	0.0041	CD20 on IgD- CD27-	TRUE	reported	textfile
rs78368496	4.63e-06	19984329	3657	0.4046	0.08819	G	A	0.02	CD20 on IgD- CD27-	TRUE	reported	textfile
rs11051833	1.52e-06	32330242	3657	-0.3556	0.07383	T	C	0.0286	CD20 on IgD- CD27-	TRUE	reported	textfile
rs9962656	1.99e-07	60847262	3657	0.14	0.02686	A	C	0.3093	CD20 on IgD- CD27-	TRUE	reported	textfile
rs13381717	3.69e-07	352095	3657	-0.2344	0.04602	T	A	0.0774	CD20 on IgD- CD27-	TRUE	reported	textfile
rs61731791	2.51e-08	50940778	3657	0.2363	0.04232	T	C	0.0972	CD20 on IgD- CD27-	TRUE	reported	textfile
rs30006	8.55e-11	49847916	3657	-0.1907	0.02929	C	T	0.2335	CD20 on IgD- CD27-	TRUE	reported	textfile
rs1883832	4.9e-13	44746982	3657	-0.1869	0.02576	C	T	0.6318	CD20 on IgD- CD27-	TRUE	reported	textfile
rs3123557	4.44e-07	24204073	3657	-0.1247	0.02465	T	C	0.5191	CD20 on IgD- CD38-	TRUE	reported	textfile
rs140120241	5.47e-06	166021518	3657	0.1647	0.03617	A	G	0.1328	CD20 on IgD- CD38-	TRUE	reported	textfile
rs849532	1.49e-07	206552726	3657	0.3227	0.06129	G	A	0.9579	CD20 on IgD- CD38-	TRUE	reported	textfile
rs187188344	2.22e-06	178858731	3657	0.3695	0.07795	G	C	0.0269	CD20 on IgD- CD38-	TRUE	reported	textfile
rs62194499	5.98e-06	207417460	3657	0.2192	0.04834	A	G	0.0714	CD20 on IgD- CD38-	TRUE	reported	textfile
rs7608595	2.47e-06	223088415	3657	0.1231	0.0261	C	T	0.6675	CD20 on IgD- CD38-	TRUE	reported	textfile
rs57271503	3.91e-07	119244593	3657	-0.158	0.03108	A	G	0.2129	CD20 on IgD- CD38-	TRUE	reported	textfile
rs9842470	9.41e-06	184221260	3657	0.1459	0.03288	T	C	0.8292	CD20 on IgD- CD38-	TRUE	reported	textfile
rs2524184	1.56e-07	30424736	3657	-0.1616	0.03075	T	A	0.7278	CD20 on IgD- CD38-	TRUE	reported	textfile
rs12200643	4.48e-07	170846603	3657	-0.7166	0.1417	A	G	0.0083	CD20 on IgD- CD38-	TRUE	reported	textfile
rs11751198	4.32e-08	31753526	3657	0.1995	0.03634	A	G	0.1839	CD20 on IgD- CD38-	TRUE	reported	textfile
rs111369841	7.84e-06	32921104	3657	0.2072	0.04629	T	C	0.0967	CD20 on IgD- CD38-	TRUE	reported	textfile
rs75915436	6.65e-06	40648455	3657	-0.4991	0.1106	T	C	0.0131	CD20 on IgD- CD38-	TRUE	reported	textfile
rs4716010	9.32e-08	15898371	3657	0.1717	0.03209	A	G	0.8194	CD20 on IgD- CD38-	TRUE	reported	textfile
rs9271146	6.12e-07	32577282	3657	-0.1507	0.03017	C	A	0.7067	CD20 on IgD- CD38-	TRUE	reported	textfile
rs2868177	4.14e-06	75589903	3657	0.1152	0.02499	G	A	0.4193	CD20 on IgD- CD38-	TRUE	reported	textfile
rs1838178	4.52e-06	92858976	3657	0.1167	0.02541	G	A	0.4009	CD20 on IgD- CD38-	TRUE	reported	textfile
rs75071948	6.98e-06	75768836	3657	0.2659	0.05907	G	T	0.0453	CD20 on IgD- CD38-	TRUE	reported	textfile
rs78368496	8.75e-06	19984329	3657	0.3921	0.08806	G	A	0.02	CD20 on IgD- CD38-	TRUE	reported	textfile
rs10501383	5.41e-10	60164527	3657	-0.255	0.04098	T	C	0.0971	CD20 on IgD- CD38-	TRUE	reported	textfile
rs61886501	5.84e-06	18870317	3657	0.6844	0.1508	T	C	0.0071	CD20 on IgD- CD38-	TRUE	reported	textfile
rs2578469	6.51e-06	4101401	3657	-0.1169	0.02589	A	G	0.3246	CD20 on IgD- CD38-	TRUE	reported	textfile
rs185205613	3.52e-06	48074625	3657	-0.2018	0.04345	A	T	0.0909	CD20 on IgD- CD38-	TRUE	reported	textfile
rs9537439	7.69e-06	57128500	3657	-0.118	0.02633	T	A	0.6478	CD20 on IgD- CD38-	TRUE	reported	textfile
rs7179991	2.52e-06	31811797	3657	-0.2259	0.04792	G	A	0.0684	CD20 on IgD- CD38-	TRUE	reported	textfile
rs16948899	5.67e-06	50866572	3657	-0.1258	0.02769	G	C	0.72	CD20 on IgD- CD38-	TRUE	reported	textfile
rs179206	1.59e-06	19303610	3657	-0.2276	0.04734	T	C	0.0737	CD20 on IgD- CD38-	TRUE	reported	textfile
rs183569210	2.27e-06	72589044	3657	-0.8397	0.1773	A	G	0.0052	CD20 on IgD- CD38-	TRUE	reported	textfile
rs61731791	3.86e-08	50940778	3657	0.2328	0.04226	T	C	0.0972	CD20 on IgD- CD38-	TRUE	reported	textfile
rs55809481	5.44e-17	49872521	3657	-0.2424	0.02879	C	T	0.2425	CD20 on IgD- CD38-	TRUE	reported	textfile
rs6120395	3.29e-06	32451693	3657	-0.1201	0.02578	G	A	0.6518	CD20 on IgD- CD38-	TRUE	reported	textfile
rs149234257	1.87e-06	7498941	3659	-0.4914	0.1029	A	T	0.0141	CD20 on IgD- CD38br	TRUE	reported	textfile
rs144229045	2.7e-06	132962425	3659	-0.2348	0.04995	T	C	0.067	CD20 on IgD- CD38br	TRUE	reported	textfile
rs17552555	8.24e-06	111440302	3659	1.142	0.2558	C	T	0.0022	CD20 on IgD- CD38br	TRUE	reported	textfile
rs67448050	7.82e-06	91379430	3659	-0.1308	0.02922	C	A	0.2344	CD20 on IgD- CD38br	TRUE	reported	textfile
rs2735071	6.28e-06	29944979	3659	0.1325	0.02929	C	G	0.311	CD20 on IgD- CD38br	TRUE	reported	textfile
rs7751471	2.82e-06	155390391	3659	-0.1572	0.03351	G	A	0.8423	CD20 on IgD- CD38br	TRUE	reported	textfile
rs12530833	9.82e-06	11098867	3659	0.8723	0.197	A	G	0.0037	CD20 on IgD- CD38br	TRUE	reported	textfile
rs2060802	6.36e-06	39502217	3659	-0.1152	0.02549	T	C	0.6136	CD20 on IgD- CD38br	TRUE	reported	textfile
rs79868028	1.84e-07	133645848	3659	0.222	0.04248	A	G	0.0935	CD20 on IgD- CD38br	TRUE	reported	textfile
rs7302954	7.22e-06	92020720	3659	0.1147	0.02552	G	A	0.6325	CD20 on IgD- CD38br	TRUE	reported	textfile
rs72665111	6.2e-06	103993749	3659	2.409	0.5322	T	C	0.0005	CD20 on IgD- CD38br	TRUE	reported	textfile
rs143489681	3.33e-06	94271829	3659	1.224	0.2628	A	G	0.002	CD20 on IgD- CD38br	TRUE	reported	textfile
rs144576056	8.52e-06	54270936	3659	3.033	0.6803	T	C	0.0003	CD20 on IgD- CD38br	TRUE	reported	textfile
rs141311171	7.51e-06	77837606	3659	-0.1354	0.03019	T	G	0.2119	CD20 on IgD- CD38br	TRUE	reported	textfile
rs11668091	7.73e-06	51583553	3659	0.1581	0.03529	C	T	0.139	CD20 on IgD- CD38br	TRUE	reported	textfile
rs17878304	1.49e-06	4956161	3659	-0.3226	0.06692	T	C	0.0343	CD20 on IgD- CD38br	TRUE	reported	textfile
rs6693971	8.79e-06	3517573	3657	-0.2283	0.0513	C	G	0.9389	CD20 on IgD- CD38dim	TRUE	reported	textfile
rs4657041	3.49e-06	161478859	3657	-0.1225	0.02636	C	T	0.3344	CD20 on IgD- CD38dim	TRUE	reported	textfile
rs187188344	7.19e-06	178858731	3657	0.3507	0.07804	G	C	0.0269	CD20 on IgD- CD38dim	TRUE	reported	textfile
rs3961790	1.19e-06	80108045	3657	0.1193	0.02452	A	G	0.4233	CD20 on IgD- CD38dim	TRUE	reported	textfile
rs7608595	8.88e-06	223088415	3657	0.1158	0.02603	C	T	0.6675	CD20 on IgD- CD38dim	TRUE	reported	textfile
rs111345451	5.76e-06	141866322	3657	4.33	0.9533	G	A	0.0001	CD20 on IgD- CD38dim	TRUE	reported	textfile
rs77612075	3.33e-06	162820460	3657	0.3325	0.0714	T	C	0.0293	CD20 on IgD- CD38dim	TRUE	reported	textfile
rs719170	1.48e-06	67432406	3657	4.925	1.021	C	T	0.0003	CD20 on IgD- CD38dim	TRUE	reported	textfile
rs9271146	6.09e-10	32577282	3657	-0.1886	0.0304	C	A	0.7067	CD20 on IgD- CD38dim	TRUE	reported	textfile
rs9469053	1.47e-10	31755776	3657	0.2372	0.03691	G	A	0.184	CD20 on IgD- CD38dim	TRUE	reported	textfile
rs909846	3.14e-08	15897003	3657	0.2058	0.03711	G	T	0.8744	CD20 on IgD- CD38dim	TRUE	reported	textfile
rs2524184	9.95e-07	30424736	3657	-0.1529	0.0312	T	A	0.7278	CD20 on IgD- CD38dim	TRUE	reported	textfile
rs111369841	2.39e-06	32921104	3657	0.2215	0.04688	T	C	0.0967	CD20 on IgD- CD38dim	TRUE	reported	textfile
rs9473626	4.46e-06	49586550	3657	0.141	0.03067	A	C	0.2114	CD20 on IgD- CD38dim	TRUE	reported	textfile
rs9650093	2.02e-06	127984089	3657	0.142	0.02983	G	A	0.2182	CD20 on IgD- CD38dim	TRUE	reported	textfile
rs13275137	6.33e-06	36731742	3657	0.2361	0.05222	A	G	0.0597	CD20 on IgD- CD38dim	TRUE	reported	textfile
rs113560800	9.61e-06	29393202	3657	0.2909	0.06563	C	G	0.036	CD20 on IgD- CD38dim	TRUE	reported	textfile
rs184418275	3.72e-06	89144616	3657	-0.8497	0.1834	T	C	0.0045	CD20 on IgD- CD38dim	TRUE	reported	textfile
rs11187166	2.97e-08	94516008	3657	0.1757	0.03163	T	C	0.1993	CD20 on IgD- CD38dim	TRUE	reported	textfile
rs149908209	1.68e-06	127473611	3657	-2.552	0.5321	C	T	0.0004	CD20 on IgD- CD38dim	TRUE	reported	textfile
rs11020715	1.84e-06	93989208	3657	-0.1261	0.02638	G	A	0.3418	CD20 on IgD- CD38dim	TRUE	reported	textfile
rs11230624	1.02e-06	60952231	3657	-0.1823	0.03724	C	G	0.1263	CD20 on IgD- CD38dim	TRUE	reported	textfile
rs2070770	2.09e-10	60230531	3657	-0.2657	0.0417	T	C	0.0965	CD20 on IgD- CD38dim	TRUE	reported	textfile
rs73025928	5e-06	123329504	3657	-0.299	0.06541	T	C	0.0361	CD20 on IgD- CD38dim	TRUE	reported	textfile
rs1447085	5.12e-07	127798516	3657	0.1294	0.02572	G	T	0.6416	CD20 on IgD- CD38dim	TRUE	reported	textfile
rs1955934	6.24e-06	37936489	3657	-0.1218	0.02692	G	A	0.7082	CD20 on IgD- CD38dim	TRUE	reported	textfile
rs74541430	9.54e-06	26201701	3657	-1.142	0.2576	A	G	0.0025	CD20 on IgD- CD38dim	TRUE	reported	textfile
rs115308973	9.06e-06	88134541	3657	-0.1649	0.03711	T	C	0.1229	CD20 on IgD- CD38dim	TRUE	reported	textfile
rs60743549	6.1e-06	60704462	3657	-0.3947	0.08713	C	G	0.0196	CD20 on IgD- CD38dim	TRUE	reported	textfile
rs8110979	6.19e-06	6951925	3657	-0.2352	0.05197	T	A	0.0576	CD20 on IgD- CD38dim	TRUE	reported	textfile
rs66579172	9.74e-07	50928270	3657	-0.1366	0.02784	T	A	0.2792	CD20 on IgD- CD38dim	TRUE	reported	textfile
rs61731791	1.75e-10	50940778	3657	0.2688	0.042	T	C	0.0972	CD20 on IgD- CD38dim	TRUE	reported	textfile
rs55809481	9.01e-29	49872521	3657	-0.3192	0.02843	C	T	0.2425	CD20 on IgD- CD38dim	TRUE	reported	textfile
rs12480920	8.74e-07	3862580	3657	-0.1577	0.032	A	G	0.1792	CD20 on IgD- CD38dim	TRUE	reported	textfile
rs112898596	1.49e-06	42039509	3657	0.2709	0.0562	T	C	0.0505	CD20 on IgD- CD38dim	TRUE	reported	textfile
rs9625961	6.78e-06	44323219	3657	0.126	0.02796	G	A	0.264	CD20 on IgD- CD38dim	TRUE	reported	textfile
rs1293260	2.89e-06	25709104	3658	0.1227	0.02619	G	C	0.339	CD20 on IgD+	TRUE	reported	textfile
rs113371046	4.28e-06	17595034	3658	0.2331	0.05062	A	G	0.0638	CD20 on IgD+	TRUE	reported	textfile
rs149360160	3.3e-06	229499798	3658	-2.41	0.5174	T	C	0.0005	CD20 on IgD+	TRUE	reported	textfile
rs79003098	1.01e-06	81965038	3658	-0.1645	0.03357	A	T	0.159	CD20 on IgD+	TRUE	reported	textfile
rs73245560	8.69e-06	43987474	3658	0.4122	0.09255	C	T	0.0182	CD20 on IgD+	TRUE	reported	textfile
rs77612075	1.53e-06	162820460	3658	0.3457	0.0718	T	C	0.0293	CD20 on IgD+	TRUE	reported	textfile
rs80155794	3.56e-06	178957291	3658	-0.3436	0.07401	A	G	0.0267	CD20 on IgD+	TRUE	reported	textfile
rs3933208	8.13e-07	161458204	3658	0.1246	0.02521	A	T	0.4125	CD20 on IgD+	TRUE	reported	textfile
rs72836542	1.64e-08	14091682	3658	0.1521	0.02688	T	C	0.3162	CD20 on IgD+	TRUE	reported	textfile
rs9270560	1.55e-09	32560741	3658	-0.1793	0.02962	C	T	0.5887	CD20 on IgD+	TRUE	reported	textfile
rs233495	4.07e-07	14806317	3658	-0.1258	0.02478	T	C	0.5585	CD20 on IgD+	TRUE	reported	textfile
rs55643835	6.82e-06	33947909	3658	-0.2438	0.05412	T	C	0.0567	CD20 on IgD+	TRUE	reported	textfile
rs62405562	2.46e-11	32451834	3658	0.1921	0.02868	G	A	0.4552	CD20 on IgD+	TRUE	reported	textfile
rs12212931	2.33e-12	15913304	3658	0.2233	0.03173	G	T	0.8197	CD20 on IgD+	TRUE	reported	textfile
rs388354	1.9e-07	40190449	3658	-0.1274	0.02442	C	A	0.5204	CD20 on IgD+	TRUE	reported	textfile
rs4939384	7.9e-16	60273642	3658	-0.2011	0.02485	G	A	0.6088	CD20 on IgD+	TRUE	reported	textfile
rs11051833	2.15e-06	32330242	3658	-0.3505	0.07384	T	C	0.0286	CD20 on IgD+	TRUE	reported	textfile
rs11059642	2.64e-06	128795644	3658	0.1428	0.03036	A	G	0.2012	CD20 on IgD+	TRUE	reported	textfile
rs8025257	5.34e-06	89600226	3658	-0.1339	0.02937	C	T	0.2285	CD20 on IgD+	TRUE	reported	textfile
rs6496328	1.59e-06	86988686	3658	-0.3047	0.06339	T	C	0.0387	CD20 on IgD+	TRUE	reported	textfile
rs7404890	1.71e-06	11007193	3658	0.1563	0.03262	A	G	0.8208	CD20 on IgD+	TRUE	reported	textfile
rs30003	1.42e-09	49846398	3658	-0.1786	0.02943	C	T	0.2303	CD20 on IgD+	TRUE	reported	textfile
rs73086355	5e-06	11850850	3658	-0.2751	0.06018	A	C	0.0432	CD20 on IgD+	TRUE	reported	textfile
rs113371046	2.06e-06	17595034	3657	0.2407	0.05062	A	G	0.0639	CD20 on IgD+ CD24-	TRUE	reported	textfile
rs1293260	8.13e-06	25709104	3657	0.1171	0.02621	G	C	0.3388	CD20 on IgD+ CD24-	TRUE	reported	textfile
rs111741355	3.67e-06	48095312	3657	-2.647	0.5709	A	G	0.0004	CD20 on IgD+ CD24-	TRUE	reported	textfile
rs149360160	2.28e-06	229499798	3657	-2.452	0.5179	T	C	0.0005	CD20 on IgD+ CD24-	TRUE	reported	textfile
rs842631	2.39e-06	61085723	3657	0.1195	0.02528	T	C	0.5088	CD20 on IgD+ CD24-	TRUE	reported	textfile
rs6443362	6.29e-06	176369881	3657	0.1113	0.02461	T	C	0.4837	CD20 on IgD+ CD24-	TRUE	reported	textfile
rs13070807	2.99e-06	56847945	3657	-0.1205	0.02576	G	C	0.6374	CD20 on IgD+ CD24-	TRUE	reported	textfile
rs73245560	3.74e-06	43987474	3657	0.4287	0.09254	C	T	0.0182	CD20 on IgD+ CD24-	TRUE	reported	textfile
rs80155794	4.88e-06	178957291	3657	-0.3388	0.07403	A	G	0.0267	CD20 on IgD+ CD24-	TRUE	reported	textfile
rs3933208	7.01e-07	161458204	3657	0.1253	0.0252	A	T	0.4126	CD20 on IgD+ CD24-	TRUE	reported	textfile
rs72836542	9.87e-10	14091682	3657	0.1645	0.02685	T	C	0.3161	CD20 on IgD+ CD24-	TRUE	reported	textfile
rs55643835	2.67e-07	33947909	3657	-0.2783	0.05397	T	C	0.0567	CD20 on IgD+ CD24-	TRUE	reported	textfile
rs62405562	1.15e-11	32451834	3657	0.1942	0.02853	G	A	0.455	CD20 on IgD+ CD24-	TRUE	reported	textfile
rs2066399	2.95e-12	15880540	3657	0.2255	0.03219	A	G	0.821	CD20 on IgD+ CD24-	TRUE	reported	textfile
rs233495	5.9e-07	14806317	3657	-0.124	0.02479	T	C	0.5585	CD20 on IgD+ CD24-	TRUE	reported	textfile
rs9270560	1.31e-08	32560741	3657	-0.1682	0.02952	C	T	0.5889	CD20 on IgD+ CD24-	TRUE	reported	textfile
rs388354	5.71e-08	40190449	3657	-0.1327	0.0244	C	A	0.5205	CD20 on IgD+ CD24-	TRUE	reported	textfile
rs12771377	8.23e-06	22717779	3657	0.2859	0.06402	G	A	0.0383	CD20 on IgD+ CD24-	TRUE	reported	textfile
rs4939384	2.29e-16	60273642	3657	-0.2046	0.02482	G	A	0.6088	CD20 on IgD+ CD24-	TRUE	reported	textfile
rs11059642	2.74e-06	128795644	3657	0.1427	0.03038	A	G	0.201	CD20 on IgD+ CD24-	TRUE	reported	textfile
rs11051833	3.28e-06	32330242	3657	-0.3439	0.07379	T	C	0.0286	CD20 on IgD+ CD24-	TRUE	reported	textfile
rs56132967	5.92e-06	61644977	3657	-0.3532	0.07788	T	G	0.0258	CD20 on IgD+ CD24-	TRUE	reported	textfile
rs6496328	2.31e-06	86988686	3657	-0.2998	0.06337	T	C	0.0387	CD20 on IgD+ CD24-	TRUE	reported	textfile
rs8025257	4.5e-06	89600226	3657	-0.1349	0.02937	C	T	0.2286	CD20 on IgD+ CD24-	TRUE	reported	textfile
rs7404890	8.42e-08	11007193	3657	0.1749	0.03258	A	G	0.8208	CD20 on IgD+ CD24-	TRUE	reported	textfile
rs11083972	2.41e-07	49896752	3657	-0.155	0.02995	G	C	0.2234	CD20 on IgD+ CD24-	TRUE	reported	textfile
rs73086355	7.32e-06	11850850	3657	-0.2701	0.06014	A	C	0.0432	CD20 on IgD+ CD24-	TRUE	reported	textfile
rs1007337	6.28e-07	39781585	3657	-0.1254	0.02513	T	C	0.6024	CD20 on IgD+ CD24-	TRUE	reported	textfile
rs116729050	5.17e-06	62560039	3657	-0.2379	0.05211	A	G	0.0591	CD20 on IgD+ CD24+	TRUE	reported	textfile
rs149204679	5.97e-06	27240644	3657	-1.317	0.2905	G	A	0.0018	CD20 on IgD+ CD24+	TRUE	reported	textfile
rs35525697	4.96e-06	149086665	3657	0.114	0.02492	T	A	0.4325	CD20 on IgD+ CD24+	TRUE	reported	textfile
rs62340965	6.08e-07	190508875	3657	-0.1558	0.03118	A	T	0.2158	CD20 on IgD+ CD24+	TRUE	reported	textfile
rs4700466	8.01e-06	61352528	3657	-0.1101	0.02461	C	T	0.5156	CD20 on IgD+ CD24+	TRUE	reported	textfile
rs114915558	3.46e-06	98564385	3657	0.305	0.06562	G	A	0.0384	CD20 on IgD+ CD24+	TRUE	reported	textfile
rs77121649	6.34e-07	31812140	3657	0.2352	0.04714	T	C	0.1047	CD20 on IgD+ CD24+	TRUE	reported	textfile
rs3129750	2.96e-06	32581515	3657	-0.1603	0.03424	A	G	0.8007	CD20 on IgD+ CD24+	TRUE	reported	textfile
rs9461562	6.65e-08	29778271	3657	0.2717	0.0502	G	A	0.1025	CD20 on IgD+ CD24+	TRUE	reported	textfile
rs1569590	1.85e-08	15898884	3657	0.2082	0.03692	G	A	0.8748	CD20 on IgD+ CD24+	TRUE	reported	textfile
rs28572463	2.9e-07	31209854	3657	0.2436	0.0474	C	G	0.1081	CD20 on IgD+ CD24+	TRUE	reported	textfile
rs13207893	1.95e-06	32586922	3657	0.1399	0.02935	C	T	0.2953	CD20 on IgD+ CD24+	TRUE	reported	textfile
rs79110866	3.79e-06	75709022	3657	0.2849	0.06153	G	A	0.0421	CD20 on IgD+ CD24+	TRUE	reported	textfile
rs76239564	6.05e-06	6361438	3657	0.6515	0.1438	G	A	0.0066	CD20 on IgD+ CD24+	TRUE	reported	textfile
rs4746507	9.57e-07	67086564	3657	0.1293	0.02634	A	C	0.3258	CD20 on IgD+ CD24+	TRUE	reported	textfile
rs1941033	9.6e-08	60249526	3657	-0.2221	0.04155	T	C	0.0982	CD20 on IgD+ CD24+	TRUE	reported	textfile
rs7128035	2.42e-06	268078	3657	-0.1284	0.02718	C	T	0.7107	CD20 on IgD+ CD24+	TRUE	reported	textfile
rs149214933	7.24e-06	64174465	3657	-0.7345	0.1635	G	T	0.0062	CD20 on IgD+ CD24+	TRUE	reported	textfile
rs2532969	7.8e-06	50896167	3657	0.1154	0.02577	T	C	0.3444	CD20 on IgD+ CD24+	TRUE	reported	textfile
rs62000215	1.33e-06	31184858	3657	-0.8854	0.1828	T	C	0.0049	CD20 on IgD+ CD24+	TRUE	reported	textfile
rs66637059	8.74e-06	17417808	3657	-0.1563	0.03511	T	C	0.1479	CD20 on IgD+ CD24+	TRUE	reported	textfile
rs11662753	9.48e-06	60657744	3657	0.1706	0.03846	G	C	0.1124	CD20 on IgD+ CD24+	TRUE	reported	textfile
rs61731791	7.15e-07	50940778	3657	0.2089	0.04207	T	C	0.0972	CD20 on IgD+ CD24+	TRUE	reported	textfile
rs55809481	1.61e-13	49872521	3657	-0.2125	0.0287	C	T	0.2425	CD20 on IgD+ CD24+	TRUE	reported	textfile
rs62623429	8.46e-06	51714781	3657	0.6367	0.1428	T	C	0.0077	CD20 on IgD+ CD24+	TRUE	reported	textfile
rs116412485	8.24e-06	40040949	3645	-0.2992	0.06701	A	C	0.0339	CD20 on IgD+ CD38-	TRUE	reported	textfile
rs17380682	1.95e-06	164447415	3645	0.2155	0.04521	T	C	0.0798	CD20 on IgD+ CD38-	TRUE	reported	textfile
rs142291033	8.99e-06	56196958	3645	0.2797	0.0629	A	G	0.0387	CD20 on IgD+ CD38-	TRUE	reported	textfile
rs187188344	3.03e-06	178858731	3645	0.3627	0.07755	G	C	0.0269	CD20 on IgD+ CD38-	TRUE	reported	textfile
rs2114442	8.6e-06	100832060	3645	0.1112	0.02496	T	C	0.5753	CD20 on IgD+ CD38-	TRUE	reported	textfile
rs75097128	1.71e-06	113292746	3645	-0.4553	0.095	G	A	0.0162	CD20 on IgD+ CD38-	TRUE	reported	textfile
rs11135082	3.66e-06	159137396	3645	0.2303	0.04967	G	A	0.0657	CD20 on IgD+ CD38-	TRUE	reported	textfile
rs76029468	9.86e-06	161525053	3645	0.2057	0.04647	G	T	0.076	CD20 on IgD+ CD38-	TRUE	reported	textfile
rs61651267	2.38e-06	143495021	3645	0.1246	0.02636	G	A	0.3321	CD20 on IgD+ CD38-	TRUE	reported	textfile
rs13190846	1.84e-07	29905727	3645	0.1625	0.03109	T	C	0.328	CD20 on IgD+ CD38-	TRUE	reported	textfile
rs2066399	6.08e-09	15880540	3645	0.187	0.03209	A	G	0.8211	CD20 on IgD+ CD38-	TRUE	reported	textfile
rs7768875	2.13e-06	32560752	3645	-0.1453	0.03061	T	C	0.4601	CD20 on IgD+ CD38-	TRUE	reported	textfile
rs78517600	8.08e-06	50239066	3645	-0.746	0.1669	C	T	0.0053	CD20 on IgD+ CD38-	TRUE	reported	textfile
rs12660382	3.9e-07	31443323	3645	0.1463	0.02878	T	C	0.3145	CD20 on IgD+ CD38-	TRUE	reported	textfile
rs150618362	8.16e-06	13572692	3645	0.7725	0.1729	G	A	0.0053	CD20 on IgD+ CD38-	TRUE	reported	textfile
rs149514748	7.65e-06	118323116	3645	0.5269	0.1176	T	C	0.0107	CD20 on IgD+ CD38-	TRUE	reported	textfile
rs12554596	8.43e-10	37002142	3645	-0.1558	0.02531	G	A	0.3892	CD20 on IgD+ CD38-	TRUE	reported	textfile
rs143959146	9.14e-06	33898132	3645	0.2878	0.06477	A	G	0.039	CD20 on IgD+ CD38-	TRUE	reported	textfile
rs7036970	3.06e-06	3182850	3645	-0.2227	0.04764	G	A	0.0713	CD20 on IgD+ CD38-	TRUE	reported	textfile
rs4474350	3.52e-06	26837236	3645	-0.1413	0.03042	C	A	0.2022	CD20 on IgD+ CD38-	TRUE	reported	textfile
rs182220218	5.94e-06	75422693	3645	-2.623	0.5783	G	A	0.0005	CD20 on IgD+ CD38-	TRUE	reported	textfile
rs2070770	7.49e-10	60230531	3645	-0.2571	0.04166	T	C	0.0967	CD20 on IgD+ CD38-	TRUE	reported	textfile
rs74054746	8.99e-06	61638400	3645	-0.347	0.07804	G	A	0.0251	CD20 on IgD+ CD38-	TRUE	reported	textfile
rs2356414	7.15e-08	71378301	3645	0.1727	0.03199	T	C	0.8106	CD20 on IgD+ CD38-	TRUE	reported	textfile
rs7216991	1.6e-06	45052253	3645	-0.1331	0.0277	A	G	0.2775	CD20 on IgD+ CD38-	TRUE	reported	textfile
rs7259731	5.67e-06	54841732	3645	-0.1961	0.04315	T	G	0.084	CD20 on IgD+ CD38-	TRUE	reported	textfile
rs30003	3.22e-11	49846398	3645	-0.1948	0.02926	C	T	0.2303	CD20 on IgD+ CD38-	TRUE	reported	textfile
rs138448626	4.55e-06	24084235	1834	-0.2856	0.06212	T	C	0.0823	CD20 on IgD+ CD38- naive	TRUE	reported	textfile
rs112695918	1.75e-06	1104584	1834	1.187	0.2474	C	T	0.0046	CD20 on IgD+ CD38- naive	TRUE	reported	textfile
rs1495924	3.72e-06	241183284	1834	-0.1614	0.03478	G	T	0.3978	CD20 on IgD+ CD38- naive	TRUE	reported	textfile
rs12470912	3.65e-06	168748110	1834	0.2166	0.04663	A	G	0.1598	CD20 on IgD+ CD38- naive	TRUE	reported	textfile
rs11920066	5.47e-06	88803979	1834	0.3359	0.07368	C	T	0.0575	CD20 on IgD+ CD38- naive	TRUE	reported	textfile
rs9808998	3.44e-06	176405898	1834	0.1621	0.03481	C	T	0.3997	CD20 on IgD+ CD38- naive	TRUE	reported	textfile
rs13061533	3.54e-06	188611158	1834	0.2044	0.04395	T	C	0.181	CD20 on IgD+ CD38- naive	TRUE	reported	textfile
rs73810453	4.62e-06	41994707	1834	0.3559	0.07745	T	A	0.0488	CD20 on IgD+ CD38- naive	TRUE	reported	textfile
rs189077909	9.45e-06	57626079	1834	-0.6429	0.1447	A	G	0.0134	CD20 on IgD+ CD38- naive	TRUE	reported	textfile
rs9269561	2.31e-08	32544405	1834	-0.2613	0.04657	G	C	0.4703	CD20 on IgD+ CD38- naive	TRUE	reported	textfile
rs17613271	7.75e-06	32621778	1834	-0.2258	0.05036	G	A	0.5589	CD20 on IgD+ CD38- naive	TRUE	reported	textfile
rs2066399	7.22e-07	15880540	1834	0.2252	0.04528	A	G	0.8244	CD20 on IgD+ CD38- naive	TRUE	reported	textfile
rs143959146	9.45e-06	33898132	1834	0.4165	0.09377	A	G	0.0354	CD20 on IgD+ CD38- naive	TRUE	reported	textfile
rs11199370	8.19e-06	122262398	1834	0.2497	0.05583	A	G	0.0998	CD20 on IgD+ CD38- naive	TRUE	reported	textfile
rs11604619	1.56e-11	60261376	1834	-0.2292	0.03378	T	A	0.6074	CD20 on IgD+ CD38- naive	TRUE	reported	textfile
rs141950809	8.37e-06	93405148	1834	0.2965	0.06636	T	C	0.0676	CD20 on IgD+ CD38- naive	TRUE	reported	textfile
rs111741301	3.52e-06	71781323	1834	0.3444	0.07403	C	G	0.0592	CD20 on IgD+ CD38- naive	TRUE	reported	textfile
rs4270172	2.84e-07	55157679	1834	-0.2012	0.03904	A	G	0.744	CD20 on IgD+ CD38- naive	TRUE	reported	textfile
rs115329330	1.58e-06	27574452	1834	-0.649	0.1347	C	G	0.0188	CD20 on IgD+ CD38- naive	TRUE	reported	textfile
rs3959642	5.66e-06	39860589	1834	-0.1656	0.03639	G	A	0.6701	CD20 on IgD+ CD38- naive	TRUE	reported	textfile
rs2481929	8.89e-06	24807579	1836	-0.2201	0.04939	G	T	0.1318	CD20 on IgD+ CD38- unsw mem	TRUE	reported	textfile
rs7598607	2.03e-06	129870972	1836	0.3217	0.0675	G	A	0.0714	CD20 on IgD+ CD38- unsw mem	TRUE	reported	textfile
rs2220549	9.19e-07	21756408	1836	-0.223	0.04528	A	G	0.165	CD20 on IgD+ CD38- unsw mem	TRUE	reported	textfile
rs68171708	2.71e-06	142855504	1836	0.1755	0.03729	T	C	0.2982	CD20 on IgD+ CD38- unsw mem	TRUE	reported	textfile
rs76078276	4.71e-06	187802062	1836	0.2051	0.04467	C	G	0.1751	CD20 on IgD+ CD38- unsw mem	TRUE	reported	textfile
rs140761841	1.07e-06	747378	1836	0.9911	0.2025	T	C	0.0065	CD20 on IgD+ CD38- unsw mem	TRUE	reported	textfile
rs1545973	2.43e-06	141622371	1836	0.175	0.03701	G	A	0.3135	CD20 on IgD+ CD38- unsw mem	TRUE	reported	textfile
rs62366714	8.67e-06	105199555	1836	0.2239	0.05019	G	T	0.1332	CD20 on IgD+ CD38- unsw mem	TRUE	reported	textfile
rs11742841	3.79e-06	108992703	1836	0.3177	0.06851	G	A	0.0643	CD20 on IgD+ CD38- unsw mem	TRUE	reported	textfile
rs760958	3.5e-07	15899354	1836	0.264	0.05162	C	T	0.8742	CD20 on IgD+ CD38- unsw mem	TRUE	reported	textfile
rs9461562	3.56e-06	29778271	1836	0.2971	0.06388	G	A	0.1021	CD20 on IgD+ CD38- unsw mem	TRUE	reported	textfile
rs9469053	8.06e-07	31755776	1836	0.2335	0.04716	G	A	0.1822	CD20 on IgD+ CD38- unsw mem	TRUE	reported	textfile
rs11230344	1.13e-06	60264409	1836	-0.165	0.03378	A	G	0.6097	CD20 on IgD+ CD38- unsw mem	TRUE	reported	textfile
rs1972795	8.65e-06	95289170	1836	0.1618	0.03626	T	C	0.3162	CD20 on IgD+ CD38- unsw mem	TRUE	reported	textfile
rs79741907	3.42e-06	94877494	1836	0.2845	0.06107	C	T	0.0847	CD20 on IgD+ CD38- unsw mem	TRUE	reported	textfile
rs12898020	1.55e-06	90835752	1836	0.16	0.03318	G	A	0.5016	CD20 on IgD+ CD38- unsw mem	TRUE	reported	textfile
rs7179991	3.19e-06	31811797	1836	-0.3159	0.0676	G	A	0.0662	CD20 on IgD+ CD38- unsw mem	TRUE	reported	textfile
rs76029565	1.42e-07	49887709	1836	-0.2138	0.04046	G	A	0.2288	CD20 on IgD+ CD38- unsw mem	TRUE	reported	textfile
rs73205632	8.96e-06	35291153	1836	-0.5144	0.1155	C	T	0.0218	CD20 on IgD+ CD38- unsw mem	TRUE	reported	textfile
rs616645	4.36e-06	12240824	3657	0.1697	0.03688	G	T	0.128	CD20 on IgD+ CD38br	TRUE	reported	textfile
rs56031692	5.17e-06	58879185	3657	0.1233	0.02702	G	T	0.2976	CD20 on IgD+ CD38br	TRUE	reported	textfile
rs7568308	2.66e-06	61051498	3657	-0.1194	0.02539	A	T	0.4688	CD20 on IgD+ CD38br	TRUE	reported	textfile
rs115361290	7.37e-06	184424836	3657	0.6185	0.1378	G	A	0.0081	CD20 on IgD+ CD38br	TRUE	reported	textfile
rs116393510	2.36e-06	200547937	3657	-0.3197	0.06762	T	C	0.0328	CD20 on IgD+ CD38br	TRUE	reported	textfile
rs2136235	4.65e-06	183075828	3657	-0.1698	0.03703	A	C	0.1278	CD20 on IgD+ CD38br	TRUE	reported	textfile
rs73175579	1.58e-06	185524179	3657	0.288	0.05989	A	C	0.0435	CD20 on IgD+ CD38br	TRUE	reported	textfile
rs1313625	8.4e-06	22458923	3657	-0.28	0.06277	A	G	0.0388	CD20 on IgD+ CD38br	TRUE	reported	textfile
rs2066399	1.13e-25	15880540	3657	0.3353	0.03177	A	G	0.821	CD20 on IgD+ CD38br	TRUE	reported	textfile
rs111983490	4.06e-07	32205324	3657	0.1748	0.03444	A	G	0.2097	CD20 on IgD+ CD38br	TRUE	reported	textfile
rs7768875	3.05e-08	32560752	3657	-0.1706	0.03073	T	C	0.461	CD20 on IgD+ CD38br	TRUE	reported	textfile
rs233493	9.82e-07	14804334	3657	-0.1252	0.02554	A	G	0.6339	CD20 on IgD+ CD38br	TRUE	reported	textfile
rs72836542	2.45e-08	14091682	3657	0.1494	0.02674	T	C	0.3161	CD20 on IgD+ CD38br	TRUE	reported	textfile
rs9271700	2.81e-06	32593198	3657	-0.1461	0.03114	C	G	0.6628	CD20 on IgD+ CD38br	TRUE	reported	textfile
rs150896136	8.72e-06	68325252	3657	0.3123	0.07013	A	G	0.0306	CD20 on IgD+ CD38br	TRUE	reported	textfile
rs10965813	2.12e-06	23378556	3657	0.1822	0.03837	G	C	0.111	CD20 on IgD+ CD38br	TRUE	reported	textfile
rs116910507	5.42e-06	137841245	3657	-0.9992	0.2194	A	G	0.003	CD20 on IgD+ CD38br	TRUE	reported	textfile
rs17233534	8.85e-06	107505960	3657	-0.9231	0.2075	C	A	0.0034	CD20 on IgD+ CD38br	TRUE	reported	textfile
rs7939177	6.73e-13	60266070	3657	-0.1785	0.02475	T	C	0.6102	CD20 on IgD+ CD38br	TRUE	reported	textfile
rs7307681	2.36e-06	55336327	3657	0.1407	0.02976	T	C	0.2186	CD20 on IgD+ CD38br	TRUE	reported	textfile
rs117266160	9.53e-06	81350884	3657	-1.669	0.3764	A	G	0.0011	CD20 on IgD+ CD38br	TRUE	reported	textfile
rs532803692	6.81e-06	20477419	3657	-0.3518	0.07807	C	A	0.0265	CD20 on IgD+ CD38br	TRUE	reported	textfile
rs146797770	3.48e-06	6772746	3657	0.4285	0.0922	C	T	0.0179	CD20 on IgD+ CD38br	TRUE	reported	textfile
rs34486765	1.75e-10	49915911	3657	0.1684	0.02631	A	G	0.3094	CD20 on IgD+ CD38br	TRUE	reported	textfile
rs234630	4.54e-06	57483655	3657	0.1293	0.02817	C	T	0.2484	CD20 on IgD+ CD38br	TRUE	reported	textfile
rs139106	1.07e-06	44569390	3657	-0.194	0.0397	A	G	0.1043	CD20 on IgD+ CD38br	TRUE	reported	textfile
rs5750823	3.92e-06	39829973	3657	-0.1167	0.02524	T	C	0.6225	CD20 on IgD+ CD38br	TRUE	reported	textfile
rs113371046	4.76e-06	17595034	3657	0.2316	0.05055	A	G	0.0639	CD20 on IgD+ CD38dim	TRUE	reported	textfile
rs1293260	9.88e-06	25709104	3657	0.1159	0.02618	G	C	0.3388	CD20 on IgD+ CD38dim	TRUE	reported	textfile
rs111741355	4.54e-06	48095312	3657	-2.608	0.5679	A	G	0.0004	CD20 on IgD+ CD38dim	TRUE	reported	textfile
rs12042193	2.05e-06	116031657	3657	-0.1223	0.02571	G	A	0.3687	CD20 on IgD+ CD38dim	TRUE	reported	textfile
rs12120358	7.3e-06	161444369	3657	-0.133	0.02962	T	A	0.2234	CD20 on IgD+ CD38dim	TRUE	reported	textfile
rs147586463	7.23e-06	169204921	3657	-0.7136	0.1588	G	A	0.0057	CD20 on IgD+ CD38dim	TRUE	reported	textfile
rs1306395	4.87e-06	61076272	3657	0.1157	0.02527	C	T	0.5145	CD20 on IgD+ CD38dim	TRUE	reported	textfile
rs73154503	8.55e-07	159871677	3657	-0.2133	0.04326	C	T	0.0886	CD20 on IgD+ CD38dim	TRUE	reported	textfile
rs77612075	1.36e-06	162820460	3657	0.3469	0.07169	T	C	0.0293	CD20 on IgD+ CD38dim	TRUE	reported	textfile
rs187747283	6.06e-06	56487565	3657	-0.165	0.03641	G	T	0.1374	CD20 on IgD+ CD38dim	TRUE	reported	textfile
rs233493	8.65e-07	14804334	3657	-0.1263	0.02563	A	G	0.6339	CD20 on IgD+ CD38dim	TRUE	reported	textfile
rs72836542	7.2e-11	14091682	3657	0.1752	0.0268	T	C	0.3161	CD20 on IgD+ CD38dim	TRUE	reported	textfile
rs55643835	3.7e-06	33947909	3657	-0.2506	0.05406	T	C	0.0567	CD20 on IgD+ CD38dim	TRUE	reported	textfile
rs9270560	2.13e-13	32560741	3657	-0.2177	0.02955	C	T	0.5889	CD20 on IgD+ CD38dim	TRUE	reported	textfile
rs2066399	1.75e-13	15880540	3657	0.2375	0.03213	A	G	0.821	CD20 on IgD+ CD38dim	TRUE	reported	textfile
rs9267484	9.49e-07	31505724	3657	0.187	0.03809	T	A	0.1739	CD20 on IgD+ CD38dim	TRUE	reported	textfile
rs62405562	1.82e-15	32451834	3657	0.2285	0.02861	G	A	0.455	CD20 on IgD+ CD38dim	TRUE	reported	textfile
rs11242780	9.76e-06	2511559	3657	0.1768	0.03993	C	G	0.105	CD20 on IgD+ CD38dim	TRUE	reported	textfile
rs76355582	4.54e-06	119197741	3657	0.2445	0.05325	C	G	0.0551	CD20 on IgD+ CD38dim	TRUE	reported	textfile
rs388354	5.39e-08	40190449	3657	-0.1329	0.02439	C	A	0.5205	CD20 on IgD+ CD38dim	TRUE	reported	textfile
rs4939384	2.5e-21	60273642	3657	-0.236	0.02474	G	A	0.6088	CD20 on IgD+ CD38dim	TRUE	reported	textfile
rs11230624	3.94e-06	60952231	3657	-0.1726	0.03735	C	G	0.1263	CD20 on IgD+ CD38dim	TRUE	reported	textfile
rs12282477	9.78e-06	90976338	3657	-0.2837	0.06407	A	T	0.0383	CD20 on IgD+ CD38dim	TRUE	reported	textfile
rs8025257	5.4e-06	89600226	3657	-0.1337	0.02934	C	T	0.2286	CD20 on IgD+ CD38dim	TRUE	reported	textfile
rs17616173	5.44e-06	86986287	3657	-0.2744	0.06027	G	A	0.0438	CD20 on IgD+ CD38dim	TRUE	reported	textfile
rs7404890	4.23e-08	11007193	3657	0.1788	0.03256	A	G	0.8208	CD20 on IgD+ CD38dim	TRUE	reported	textfile
rs17763050	6.43e-07	43903336	3657	0.1424	0.02857	A	G	0.2901	CD20 on IgD+ CD38dim	TRUE	reported	textfile
rs34486765	2.9e-10	49915911	3657	0.167	0.02642	A	G	0.3094	CD20 on IgD+ CD38dim	TRUE	reported	textfile
rs61731791	9.99e-07	50940778	3657	0.2071	0.04225	T	C	0.0972	CD20 on IgD+ CD38dim	TRUE	reported	textfile
rs73086355	1.74e-06	11850850	3657	-0.2878	0.06009	A	C	0.0432	CD20 on IgD+ CD38dim	TRUE	reported	textfile
rs1007337	3.34e-08	39781585	3657	-0.1389	0.02509	T	C	0.6024	CD20 on IgD+ CD38dim	TRUE	reported	textfile
rs4657041	6.11e-07	161478859	3657	-0.1315	0.02632	C	T	0.3344	CD20 on memory B cell	TRUE	reported	textfile
rs2492599	3.17e-06	24058449	3657	-0.119	0.0255	T	C	0.6348	CD20 on memory B cell	TRUE	reported	textfile
rs187188344	2.26e-06	178858731	3657	0.3684	0.07778	G	C	0.0269	CD20 on memory B cell	TRUE	reported	textfile
rs13080324	3.73e-06	111952407	3657	0.1159	0.02501	A	C	0.4322	CD20 on memory B cell	TRUE	reported	textfile
rs2114442	3.12e-06	100832060	3657	0.1168	0.025	T	C	0.5751	CD20 on memory B cell	TRUE	reported	textfile
rs1422711	4.68e-06	143621838	3657	-0.119	0.02595	C	T	0.6626	CD20 on memory B cell	TRUE	reported	textfile
rs295654	4.23e-06	58107171	3657	0.1171	0.02541	T	C	0.6113	CD20 on memory B cell	TRUE	reported	textfile
rs77612075	1.55e-06	162820460	3657	0.3439	0.07146	T	C	0.0293	CD20 on memory B cell	TRUE	reported	textfile
rs111369841	8.4e-06	32921104	3657	0.207	0.04641	T	C	0.0967	CD20 on memory B cell	TRUE	reported	textfile
rs13190846	7.35e-09	29905727	3657	0.1821	0.03141	T	C	0.328	CD20 on memory B cell	TRUE	reported	textfile
rs13207893	1.86e-06	32586922	3657	0.1402	0.02935	C	T	0.2953	CD20 on memory B cell	TRUE	reported	textfile
rs9461562	8.25e-09	29778271	3657	0.2896	0.05014	G	A	0.1025	CD20 on memory B cell	TRUE	reported	textfile
rs233495	3.87e-06	14806317	3657	-0.1142	0.02469	T	C	0.5585	CD20 on memory B cell	TRUE	reported	textfile
rs1569590	1.1e-09	15898884	3657	0.2257	0.03693	G	A	0.8748	CD20 on memory B cell	TRUE	reported	textfile
rs28572463	2.98e-08	31209854	3657	0.2629	0.04733	C	G	0.1081	CD20 on memory B cell	TRUE	reported	textfile
rs145640001	6.96e-06	97002096	3657	0.4237	0.09413	T	G	0.0161	CD20 on memory B cell	TRUE	reported	textfile
rs12554596	4.6e-06	37002142	3657	-0.1168	0.02544	G	A	0.3891	CD20 on memory B cell	TRUE	reported	textfile
rs7035906	3.99e-06	95898832	3657	0.2917	0.06316	A	G	0.0416	CD20 on memory B cell	TRUE	reported	textfile
rs75071948	9.59e-06	75768836	3657	0.2609	0.05887	G	T	0.0453	CD20 on memory B cell	TRUE	reported	textfile
rs11187166	2.25e-06	94516008	3657	0.1499	0.03164	T	C	0.1993	CD20 on memory B cell	TRUE	reported	textfile
rs182220218	1.77e-06	75422693	3657	-2.752	0.5751	G	A	0.0005	CD20 on memory B cell	TRUE	reported	textfile
rs149695230	3.73e-06	60288804	3657	0.1855	0.04005	G	T	0.1079	CD20 on memory B cell	TRUE	reported	textfile
rs7128035	8.32e-06	268078	3657	-0.1214	0.02721	C	T	0.7107	CD20 on memory B cell	TRUE	reported	textfile
rs2070770	8.13e-11	60230531	3657	-0.2717	0.04169	T	C	0.0965	CD20 on memory B cell	TRUE	reported	textfile
rs2578469	9.94e-06	4101401	3657	-0.114	0.02575	A	G	0.3246	CD20 on memory B cell	TRUE	reported	textfile
rs193090598	2.34e-06	32460708	3657	-0.5031	0.1064	C	T	0.013	CD20 on memory B cell	TRUE	reported	textfile
rs179212	4.19e-06	19308868	3657	-0.212	0.046	C	T	0.0772	CD20 on memory B cell	TRUE	reported	textfile
rs12460030	3.89e-06	3361489	3657	-0.2482	0.05368	C	T	0.9445	CD20 on memory B cell	TRUE	reported	textfile
rs30003	1.71e-20	49846398	3657	-0.2717	0.02911	C	T	0.2304	CD20 on memory B cell	TRUE	reported	textfile
rs61731791	9.84e-07	50940778	3657	0.2065	0.04212	T	C	0.0972	CD20 on memory B cell	TRUE	reported	textfile
rs111741355	8.11e-06	48095312	3657	-2.561	0.573	A	G	0.0004	CD20 on naive-mature B cell	TRUE	reported	textfile
rs12042193	3.76e-06	116031657	3657	-0.1193	0.02575	G	A	0.3687	CD20 on naive-mature B cell	TRUE	reported	textfile
rs113371046	4.65e-06	17595034	3657	0.2324	0.05068	A	G	0.0639	CD20 on naive-mature B cell	TRUE	reported	textfile
rs149360160	3.26e-06	229499798	3657	-2.418	0.5188	T	C	0.0005	CD20 on naive-mature B cell	TRUE	reported	textfile
rs114931155	4.74e-06	130319698	3657	-1.511	0.3296	T	C	0.0012	CD20 on naive-mature B cell	TRUE	reported	textfile
rs73245560	8.95e-06	43987474	3657	0.4119	0.09261	C	T	0.0182	CD20 on naive-mature B cell	TRUE	reported	textfile
rs3933208	2.36e-06	161458204	3657	0.1192	0.02522	A	T	0.4126	CD20 on naive-mature B cell	TRUE	reported	textfile
rs72836542	5.42e-09	14091682	3657	0.1572	0.02688	T	C	0.3161	CD20 on naive-mature B cell	TRUE	reported	textfile
rs233495	5.97e-07	14806317	3657	-0.124	0.0248	T	C	0.5585	CD20 on naive-mature B cell	TRUE	reported	textfile
rs9270560	6.52e-09	32560741	3657	-0.1712	0.02943	C	T	0.5889	CD20 on naive-mature B cell	TRUE	reported	textfile
rs62405562	9.18e-11	32451834	3657	0.1848	0.02844	G	A	0.455	CD20 on naive-mature B cell	TRUE	reported	textfile
rs55643835	2.97e-07	33947909	3657	-0.2769	0.05393	T	C	0.0567	CD20 on naive-mature B cell	TRUE	reported	textfile
rs6910382	2.53e-12	15914349	3657	0.2234	0.0318	G	C	0.8198	CD20 on naive-mature B cell	TRUE	reported	textfile
rs388354	3.93e-08	40190449	3657	-0.1343	0.0244	C	A	0.5205	CD20 on naive-mature B cell	TRUE	reported	textfile
rs117400501	7.08e-06	75444519	3657	0.3759	0.08357	T	C	0.0221	CD20 on naive-mature B cell	TRUE	reported	textfile
rs143129208	2.46e-06	99391820	3657	1.096	0.2323	G	A	0.0025	CD20 on naive-mature B cell	TRUE	reported	textfile
rs1941018	3.16e-15	60268994	3657	-0.1965	0.02481	G	A	0.6081	CD20 on naive-mature B cell	TRUE	reported	textfile
rs11051833	3.31e-06	32330242	3657	-0.3438	0.07381	T	C	0.0286	CD20 on naive-mature B cell	TRUE	reported	textfile
rs10785682	7.28e-06	47837477	3657	-0.1134	0.02525	C	T	0.587	CD20 on naive-mature B cell	TRUE	reported	textfile
rs6496328	1.94e-06	86988686	3657	-0.3022	0.06339	T	C	0.0387	CD20 on naive-mature B cell	TRUE	reported	textfile
rs8025257	5.16e-06	89600226	3657	-0.1341	0.02938	C	T	0.2286	CD20 on naive-mature B cell	TRUE	reported	textfile
rs7404890	3.37e-06	11007193	3657	0.1518	0.03262	A	G	0.8208	CD20 on naive-mature B cell	TRUE	reported	textfile
rs36056466	9.53e-06	45083383	3657	-0.1167	0.02632	G	A	0.3425	CD20 on naive-mature B cell	TRUE	reported	textfile
rs30003	1.67e-08	49846398	3657	-0.1667	0.02948	C	T	0.2304	CD20 on naive-mature B cell	TRUE	reported	textfile
rs61731791	7.41e-06	50940778	3657	0.1901	0.04236	T	C	0.0972	CD20 on naive-mature B cell	TRUE	reported	textfile
rs2413592	1.26e-06	39858196	3657	-0.1245	0.02565	G	A	0.6457	CD20 on naive-mature B cell	TRUE	reported	textfile
rs74446027	3.64e-06	202171923	3657	0.2192	0.04727	T	C	0.0697	CD20 on sw mem	TRUE	reported	textfile
rs12030328	4.36e-07	24051614	3657	-0.1301	0.02571	G	A	0.6349	CD20 on sw mem	TRUE	reported	textfile
rs7608595	9.71e-06	223088415	3657	0.1162	0.02622	C	T	0.6675	CD20 on sw mem	TRUE	reported	textfile
rs137894231	8e-06	29442718	3657	0.4974	0.1112	G	T	0.0129	CD20 on sw mem	TRUE	reported	textfile
rs187188344	2.48e-07	178858731	3657	0.4058	0.07851	G	C	0.0269	CD20 on sw mem	TRUE	reported	textfile
rs78988304	9.88e-06	25982156	3657	0.2863	0.06468	T	G	0.0386	CD20 on sw mem	TRUE	reported	textfile
rs13134942	6.58e-06	181179470	3657	0.1534	0.03399	T	C	0.1555	CD20 on sw mem	TRUE	reported	textfile
rs77612075	2e-06	162820460	3657	0.3425	0.07195	T	C	0.0293	CD20 on sw mem	TRUE	reported	textfile
rs1569590	2.88e-08	15898884	3657	0.207	0.03723	G	A	0.8748	CD20 on sw mem	TRUE	reported	textfile
rs11751198	4.52e-09	31753526	3657	0.2182	0.03712	A	G	0.1839	CD20 on sw mem	TRUE	reported	textfile
rs12200643	3.59e-06	170846603	3657	-0.6608	0.1424	A	G	0.0083	CD20 on sw mem	TRUE	reported	textfile
rs9271146	1.77e-08	32577282	3657	-0.1728	0.03061	C	A	0.7067	CD20 on sw mem	TRUE	reported	textfile
rs111369841	1.43e-06	32921104	3657	0.2275	0.04713	T	C	0.0967	CD20 on sw mem	TRUE	reported	textfile
rs2524184	5.89e-07	30424736	3657	-0.1569	0.03136	T	A	0.7278	CD20 on sw mem	TRUE	reported	textfile
rs9650093	2.74e-07	127984089	3657	0.1547	0.03003	G	A	0.2182	CD20 on sw mem	TRUE	reported	textfile
rs11138252	6.33e-06	82087111	3657	0.2987	0.06606	T	G	0.0335	CD20 on sw mem	TRUE	reported	textfile
rs140207086	6.11e-06	124822185	3657	-0.8011	0.1769	T	C	0.0048	CD20 on sw mem	TRUE	reported	textfile
rs75071948	3.12e-06	75768836	3657	0.2771	0.05934	G	T	0.0453	CD20 on sw mem	TRUE	reported	textfile
rs35039517	2e-09	94522438	3657	0.1894	0.0315	A	G	0.203	CD20 on sw mem	TRUE	reported	textfile
rs73025942	4.28e-06	123334349	3657	-0.3089	0.06709	C	G	0.0345	CD20 on sw mem	TRUE	reported	textfile
rs143129208	3.71e-06	99391820	3657	1.068	0.2304	G	A	0.0025	CD20 on sw mem	TRUE	reported	textfile
rs7128035	4.78e-06	268078	3657	-0.1256	0.02742	C	T	0.7107	CD20 on sw mem	TRUE	reported	textfile
rs11230624	5.83e-06	60952231	3657	-0.1704	0.03753	C	G	0.1263	CD20 on sw mem	TRUE	reported	textfile
rs10501383	3.61e-13	60164527	3657	-0.2991	0.04099	T	C	0.0971	CD20 on sw mem	TRUE	reported	textfile
rs185205613	9.6e-06	48074625	3657	-0.1933	0.04362	A	T	0.0909	CD20 on sw mem	TRUE	reported	textfile
rs1447085	8.35e-06	127798516	3657	0.1157	0.02593	G	T	0.6416	CD20 on sw mem	TRUE	reported	textfile
rs187026890	5.54e-06	93770077	3657	1.361	0.2992	C	A	0.0021	CD20 on sw mem	TRUE	reported	textfile
rs179206	5.38e-07	19303610	3657	-0.2383	0.04745	T	C	0.0737	CD20 on sw mem	TRUE	reported	textfile
rs62122620	4.21e-06	14871311	3657	0.4715	0.1023	T	A	0.0144	CD20 on sw mem	TRUE	reported	textfile
rs55809481	9.31e-29	49872521	3657	-0.3215	0.02865	C	T	0.2425	CD20 on sw mem	TRUE	reported	textfile
rs61731791	2.83e-08	50940778	3657	0.2358	0.04238	T	C	0.0972	CD20 on sw mem	TRUE	reported	textfile
rs8110979	1.15e-06	6951925	3657	-0.255	0.05234	T	A	0.0576	CD20 on sw mem	TRUE	reported	textfile
rs12480920	7.53e-06	3862580	3657	-0.1447	0.03226	A	G	0.1792	CD20 on sw mem	TRUE	reported	textfile
rs112898596	6.67e-06	42039509	3657	0.2555	0.05665	T	C	0.0505	CD20 on sw mem	TRUE	reported	textfile
rs12026973	5.37e-07	107824037	3657	-0.1927	0.03837	T	G	0.1162	CD20 on transitional	TRUE	reported	textfile
rs72683667	9.81e-06	78106407	3657	-0.4311	0.09737	T	C	0.0164	CD20 on transitional	TRUE	reported	textfile
rs114212270	3.89e-06	174337105	3657	-0.245	0.05299	C	T	0.0569	CD20 on transitional	TRUE	reported	textfile
rs12473410	8.07e-06	115568051	3657	-0.2733	0.06115	G	C	0.0421	CD20 on transitional	TRUE	reported	textfile
rs73175579	6.3e-07	185524179	3657	0.3017	0.06046	A	C	0.0435	CD20 on transitional	TRUE	reported	textfile
rs114984432	8.42e-06	42912480	3657	-2.951	0.6615	A	G	0.0003	CD20 on transitional	TRUE	reported	textfile
rs73252531	6.21e-06	25162256	3657	0.1762	0.03894	C	A	0.1136	CD20 on transitional	TRUE	reported	textfile
rs146974582	8.16e-06	158703283	3657	0.6145	0.1376	G	A	0.0083	CD20 on transitional	TRUE	reported	textfile
rs879299	6.36e-19	15897007	3657	0.287	0.03212	G	T	0.8198	CD20 on transitional	TRUE	reported	textfile
rs233495	7.26e-07	14806317	3657	-0.1237	0.02493	T	C	0.5585	CD20 on transitional	TRUE	reported	textfile
rs9273390	7.55e-06	32627042	3657	0.159	0.03546	C	G	0.1922	CD20 on transitional	TRUE	reported	textfile
rs72836542	2.43e-06	14091682	3657	0.1277	0.02705	T	C	0.3161	CD20 on transitional	TRUE	reported	textfile
rs61011928	5.8e-06	56434969	3657	0.1194	0.02629	T	A	0.3251	CD20 on transitional	TRUE	reported	textfile
rs34900401	8.77e-06	148563716	3657	0.2107	0.04732	G	A	0.0756	CD20 on transitional	TRUE	reported	textfile
rs10958698	9.16e-06	41641075	3657	0.1208	0.0272	T	C	0.3013	CD20 on transitional	TRUE	reported	textfile
rs76437378	7.34e-06	83114502	3657	0.29	0.06458	C	A	0.0372	CD20 on transitional	TRUE	reported	textfile
rs978366	6.48e-06	95731909	3657	-0.1644	0.0364	G	C	0.1321	CD20 on transitional	TRUE	reported	textfile
rs7939177	7.12e-14	60266070	3657	-0.1877	0.02497	T	C	0.6102	CD20 on transitional	TRUE	reported	textfile
rs11055535	7.13e-06	13754468	3657	0.1658	0.03686	C	T	0.1313	CD20 on transitional	TRUE	reported	textfile
rs11627327	7.12e-06	26441807	3657	-0.1949	0.04334	G	A	0.0908	CD20 on transitional	TRUE	reported	textfile
rs145131147	9.65e-06	55101477	3657	0.1127	0.02543	A	G	0.5766	CD20 on transitional	TRUE	reported	textfile
rs9910861	4.95e-06	2801009	3657	-0.1755	0.03837	A	T	0.8853	CD20 on transitional	TRUE	reported	textfile
rs117413283	5.49e-06	47434681	3657	2.021	0.4439	T	C	0.0011	CD20 on transitional	TRUE	reported	textfile
rs118186161	3.06e-06	17549328	3657	-0.2376	0.05084	G	C	0.0643	CD20 on transitional	TRUE	reported	textfile
rs34486765	3.82e-06	49915911	3657	0.1233	0.02664	A	G	0.3094	CD20 on transitional	TRUE	reported	textfile
rs149341358	5.29e-06	46442156	3657	-1.087	0.2385	T	C	0.0027	CD20 on transitional	TRUE	reported	textfile
rs11205970	5.08e-06	53008441	3657	0.1723	0.03772	T	A	0.1373	CD20 on unsw mem	TRUE	reported	textfile
rs187188344	2.83e-06	178858731	3657	0.3655	0.07792	G	C	0.0269	CD20 on unsw mem	TRUE	reported	textfile
rs9310657	4.58e-06	21797575	3657	0.1311	0.02856	G	T	0.7637	CD20 on unsw mem	TRUE	reported	textfile
rs13133046	1.38e-06	23393356	3657	-0.3755	0.07765	G	A	0.0245	CD20 on unsw mem	TRUE	reported	textfile
rs62340965	3.64e-06	190508875	3657	-0.1451	0.03129	A	T	0.2158	CD20 on unsw mem	TRUE	reported	textfile
rs2114442	8.24e-06	100832060	3657	0.1119	0.02506	T	C	0.5751	CD20 on unsw mem	TRUE	reported	textfile
rs77612075	9.46e-07	162820460	3657	0.3517	0.07161	T	C	0.0293	CD20 on unsw mem	TRUE	reported	textfile
rs77330263	3.38e-06	149134235	3657	0.538	0.1156	T	C	0.0113	CD20 on unsw mem	TRUE	reported	textfile
rs112405902	1.75e-08	31809504	3657	0.2604	0.0461	A	G	0.1069	CD20 on unsw mem	TRUE	reported	textfile
rs2523761	3.98e-07	29818726	3657	0.2051	0.04038	G	A	0.1628	CD20 on unsw mem	TRUE	reported	textfile
rs233495	2.53e-06	14806317	3657	-0.1166	0.02474	T	C	0.5585	CD20 on unsw mem	TRUE	reported	textfile
rs147717587	1.88e-06	32623828	3657	-0.438	0.09174	T	C	0.0544	CD20 on unsw mem	TRUE	reported	textfile
rs6459417	7.25e-10	15858996	3657	0.2282	0.03694	T	C	0.8737	CD20 on unsw mem	TRUE	reported	textfile
rs28572463	6.23e-08	31209854	3657	0.2569	0.04736	C	G	0.1081	CD20 on unsw mem	TRUE	reported	textfile
rs12554596	1.92e-07	37002142	3657	-0.1329	0.02547	G	A	0.3891	CD20 on unsw mem	TRUE	reported	textfile
rs149312070	8.62e-06	132155649	3657	1.036	0.2325	T	C	0.003	CD20 on unsw mem	TRUE	reported	textfile
rs10047347	4.78e-06	26741516	3657	0.117	0.02555	T	C	0.4197	CD20 on unsw mem	TRUE	reported	textfile
rs182220218	5.54e-06	75422693	3657	-2.625	0.5769	G	A	0.0005	CD20 on unsw mem	TRUE	reported	textfile
rs4447195	1.45e-09	60249734	3657	-0.2525	0.04163	T	C	0.0982	CD20 on unsw mem	TRUE	reported	textfile
rs149695230	3.31e-06	60288804	3657	0.1869	0.04012	G	T	0.1079	CD20 on unsw mem	TRUE	reported	textfile
rs149214933	7.75e-06	64174465	3657	-0.7343	0.164	G	T	0.0062	CD20 on unsw mem	TRUE	reported	textfile
rs75146873	6.83e-06	50953211	3657	0.1888	0.04191	C	G	0.0991	CD20 on unsw mem	TRUE	reported	textfile
rs6509428	2.09e-16	49853881	3657	-0.2404	0.02912	T	C	0.2323	CD20 on unsw mem	TRUE	reported	textfile
rs12460030	3.85e-06	3361489	3657	-0.2489	0.05379	C	T	0.9445	CD20 on unsw mem	TRUE	reported	textfile
rs78398983	2.84e-06	32864978	3657	1.716	0.366	A	G	0.0011	CD20 on unsw mem	TRUE	reported	textfile
rs34719184	5.4e-06	546536	3654	-0.1504	0.03301	A	G	0.168	CD24 on CD24+ CD27+	TRUE	reported	textfile
rs113934809	5.88e-06	191984672	3654	-1.459	0.3215	G	A	0.0012	CD24 on CD24+ CD27+	TRUE	reported	textfile
rs1471412	2.71e-06	131810654	3654	-0.1618	0.03443	T	C	0.8537	CD24 on CD24+ CD27+	TRUE	reported	textfile
rs142793352	9.75e-06	188139428	3648	0.4182	0.09444	C	A	0.0182	CD24 on IgD- CD38-	TRUE	reported	textfile
rs10925304	9.02e-06	237235986	3648	0.121	0.02722	T	C	0.2862	CD24 on IgD- CD38-	TRUE	reported	textfile
rs2173295	7.54e-06	54943264	3648	0.2059	0.04591	C	A	0.0799	CD24 on IgD- CD38-	TRUE	reported	textfile
rs72635970	1.3e-06	73868977	3648	0.2988	0.06163	G	T	0.0444	CD24 on IgD- CD38-	TRUE	reported	textfile
rs9811806	4.92e-06	164038932	3648	-0.1982	0.04332	A	G	0.0975	CD24 on IgD- CD38-	TRUE	reported	textfile
rs2236073	1.36e-12	106898421	3648	0.1798	0.02528	A	G	0.5996	CD24 on IgD- CD38-	TRUE	reported	textfile
rs72829705	2.1e-06	23390794	3648	0.2326	0.04895	T	C	0.0739	CD24 on IgD- CD38-	TRUE	reported	textfile
rs9400058	2.21e-25	107164076	3648	-0.5307	0.05059	G	A	0.0651	CD24 on IgD- CD38-	TRUE	reported	textfile
rs76990892	1.34e-06	101131432	3648	0.6238	0.1288	A	T	0.01	CD24 on IgD- CD38-	TRUE	reported	textfile
rs1800542	1.38e-06	12292528	3648	-0.4765	0.09854	A	G	0.0158	CD24 on IgD- CD38-	TRUE	reported	textfile
rs117066281	3.53e-06	84921322	3648	-1.174	0.2528	T	A	0.0022	CD24 on IgD- CD38-	TRUE	reported	textfile
rs17816653	5.18e-06	1284332	3648	-0.1416	0.03102	A	C	0.1933	CD24 on IgD- CD38-	TRUE	reported	textfile
rs75583168	7.59e-06	131650003	3648	0.7403	0.1651	A	G	0.0055	CD24 on IgD- CD38-	TRUE	reported	textfile
rs74343204	1.72e-06	4327663	3648	-0.1587	0.03313	A	G	0.1771	CD24 on IgD- CD38-	TRUE	reported	textfile
rs117049974	6.58e-06	117755959	3648	1.623	0.3595	T	C	0.0012	CD24 on IgD- CD38-	TRUE	reported	textfile
rs111701276	5.94e-07	28274639	3648	0.8833	0.1766	G	A	0.0049	CD24 on IgD- CD38-	TRUE	reported	textfile
rs314497	2.65e-06	115341932	3648	0.19	0.0404	T	G	0.895	CD24 on IgD- CD38-	TRUE	reported	textfile
rs10777201	2.65e-06	77884772	3648	-0.1487	0.03162	C	A	0.8052	CD24 on IgD- CD38-	TRUE	reported	textfile
rs9574429	1.59e-06	80035438	3648	0.1219	0.02536	G	A	0.4616	CD24 on IgD- CD38-	TRUE	reported	textfile
rs117080191	8.75e-06	102960469	3648	1.145	0.2572	T	C	0.0025	CD24 on IgD- CD38-	TRUE	reported	textfile
rs77636548	1.46e-06	43192207	3648	-0.326	0.06758	C	T	0.0345	CD24 on IgD- CD38-	TRUE	reported	textfile
rs2895071	5.62e-06	96894306	3648	0.8445	0.1857	C	T	0.0051	CD24 on IgD- CD38-	TRUE	reported	textfile
rs4784022	1.58e-06	58051178	3648	-0.1354	0.02815	T	C	0.7277	CD24 on IgD- CD38-	TRUE	reported	textfile
rs11568076	3.27e-07	4544520	3648	1.2	0.2345	G	A	0.0029	CD24 on IgD- CD38-	TRUE	reported	textfile
rs113883551	4.89e-06	24190315	3648	0.1339	0.02927	C	T	0.237	CD24 on IgD- CD38-	TRUE	reported	textfile
rs12968683	7.1e-06	23625106	3648	-0.3668	0.08156	A	G	0.0238	CD24 on IgD- CD38-	TRUE	reported	textfile
rs4808045	9.97e-06	16423035	3648	0.1255	0.02836	T	C	0.7378	CD24 on IgD- CD38-	TRUE	reported	textfile
rs56913504	6.39e-06	52133353	3648	-0.2589	0.05728	A	G	0.0459	CD24 on IgD- CD38-	TRUE	reported	textfile
rs6073000	5.27e-06	41777449	3648	0.2895	0.06348	C	T	0.959	CD24 on IgD- CD38-	TRUE	reported	textfile
rs181819396	2.19e-06	191984411	3649	1.264	0.2666	G	C	0.0022	CD24 on IgD- CD38dim	TRUE	reported	textfile
rs61820496	9.05e-07	158541235	3649	-0.2216	0.04504	A	G	0.0836	CD24 on IgD- CD38dim	TRUE	reported	textfile
rs7532008	5.9e-06	150960350	3649	0.1141	0.02516	C	A	0.4531	CD24 on IgD- CD38dim	TRUE	reported	textfile
rs146949757	5.22e-06	177354939	3649	0.8787	0.1926	G	T	0.0038	CD24 on IgD- CD38dim	TRUE	reported	textfile
rs35629713	3.62e-07	156376531	3649	0.3684	0.07227	A	C	0.0288	CD24 on IgD- CD38dim	TRUE	reported	textfile
rs7606151	3.29e-06	88835687	3649	0.1171	0.02513	C	A	0.5025	CD24 on IgD- CD38dim	TRUE	reported	textfile
rs12642193	6.47e-07	25916457	3649	-0.168	0.0337	G	A	0.1576	CD24 on IgD- CD38dim	TRUE	reported	textfile
rs629732	7.63e-06	112356263	3655	0.1134	0.02531	A	G	0.4274	CD24 on IgD+ CD24+	TRUE	reported	textfile
rs143386390	1.39e-06	6146588	3655	1.222	0.2527	T	C	0.0026	CD24 on IgD+ CD24+	TRUE	reported	textfile
rs2902453	9.67e-06	113923281	3655	1.369	0.309	G	A	0.0015	CD24 on IgD+ CD24+	TRUE	reported	textfile
rs34548572	7.22e-06	4748193	3655	-0.1374	0.03057	A	G	0.1984	CD24 on IgD+ CD24+	TRUE	reported	textfile
rs1471412	6.32e-06	131810654	3655	-0.1559	0.03447	T	C	0.8538	CD24 on IgD+ CD24+	TRUE	reported	textfile
rs4862454	2.69e-06	185816062	3655	-0.1279	0.02721	A	G	0.2981	CD24 on IgD+ CD24+	TRUE	reported	textfile
rs11930977	9.94e-06	91342005	3655	-0.5551	0.1255	T	G	0.0094	CD24 on IgD+ CD24+	TRUE	reported	textfile
rs17370695	6.46e-06	92906685	3655	-0.1585	0.0351	C	A	0.1491	CD24 on IgD+ CD24+	TRUE	reported	textfile
rs13171255	4.49e-06	159374162	3655	0.1606	0.03496	G	A	0.1514	CD24 on IgD+ CD24+	TRUE	reported	textfile
rs12200293	2.14e-07	101259222	3655	-0.306	0.05889	A	C	0.0462	CD24 on IgD+ CD24+	TRUE	reported	textfile
rs9273358	9.26e-07	32626019	3655	-0.1411	0.0287	T	C	0.5661	CD24 on IgD+ CD24+	TRUE	reported	textfile
rs2236073	1.54e-11	106898421	3655	0.1681	0.02484	A	G	0.5997	CD24 on IgD+ CD24+	TRUE	reported	textfile
rs9400058	1.16e-49	107164076	3655	-0.7377	0.04904	G	A	0.065	CD24 on IgD+ CD24+	TRUE	reported	textfile
rs150087880	2.08e-07	66021291	3655	-2.09	0.4017	T	C	0.0011	CD24 on IgD+ CD24+	TRUE	reported	textfile
rs9478944	8.5e-06	151400649	3655	0.1656	0.03714	A	G	0.8793	CD24 on IgD+ CD24+	TRUE	reported	textfile
rs144967366	4.57e-06	57821837	3655	-2.512	0.5471	C	T	0.0005	CD24 on IgD+ CD24+	TRUE	reported	textfile
rs117513979	2.91e-06	103968091	3655	-2.508	0.5353	C	T	0.0004	CD24 on IgD+ CD24+	TRUE	reported	textfile
rs147803894	9.31e-06	28798971	3655	-1.315	0.2963	A	G	0.0014	CD24 on IgD+ CD24+	TRUE	reported	textfile
rs7116224	3.93e-06	15734002	3655	-0.1154	0.02496	A	G	0.4442	CD24 on IgD+ CD24+	TRUE	reported	textfile
rs189504940	4.75e-06	87629976	3655	0.5304	0.1157	A	T	0.0118	CD24 on IgD+ CD24+	TRUE	reported	textfile
rs147649139	9.45e-06	2310188	3655	-0.4	0.09017	G	T	0.0193	CD24 on IgD+ CD24+	TRUE	reported	textfile
rs4942468	1.71e-06	46618290	3655	-0.1257	0.02624	A	C	0.6811	CD24 on IgD+ CD24+	TRUE	reported	textfile
rs12930821	5.78e-07	58054671	3655	-0.1445	0.02886	C	G	0.7592	CD24 on IgD+ CD24+	TRUE	reported	textfile
rs117820766	5.82e-06	61346454	3655	0.6725	0.1482	A	G	0.007	CD24 on IgD+ CD24+	TRUE	reported	textfile
rs78157884	7.72e-06	50026310	3655	0.2046	0.04567	A	T	0.081	CD24 on IgD+ CD24+	TRUE	reported	textfile
rs285250	1.93e-06	16416430	3655	0.1309	0.02745	C	T	0.7227	CD24 on IgD+ CD24+	TRUE	reported	textfile
rs11102943	7.19e-06	115907459	3638	-0.1499	0.03334	A	G	0.1682	CD24 on IgD+ CD38-	TRUE	reported	textfile
rs75307680	9.33e-06	144289202	3638	0.4013	0.09042	G	T	0.0201	CD24 on IgD+ CD38-	TRUE	reported	textfile
rs77154655	6.94e-06	16255245	3638	-0.2498	0.05549	C	T	0.0524	CD24 on IgD+ CD38-	TRUE	reported	textfile
rs4435699	7.95e-06	164019500	3638	0.1151	0.02573	G	C	0.6192	CD24 on IgD+ CD38-	TRUE	reported	textfile
rs144378737	3.47e-06	144991868	3638	-2.105	0.4528	G	A	0.0007	CD24 on IgD+ CD38-	TRUE	reported	textfile
rs62358439	8.69e-06	57060537	3638	-1.053	0.2364	A	G	0.0026	CD24 on IgD+ CD38-	TRUE	reported	textfile
rs1007713	4.85e-06	79150995	3638	0.1897	0.04144	A	G	0.1009	CD24 on IgD+ CD38-	TRUE	reported	textfile
rs72782129	6.88e-06	111200853	3638	1.139	0.2529	G	T	0.0019	CD24 on IgD+ CD38-	TRUE	reported	textfile
rs9400058	2.66e-17	107164076	3638	-0.432	0.05081	G	A	0.0651	CD24 on IgD+ CD38-	TRUE	reported	textfile
rs783418	4.36e-06	106962679	3638	-0.1534	0.03335	C	G	0.834	CD24 on IgD+ CD38-	TRUE	reported	textfile
rs9479391	3.14e-06	153107656	3638	-0.2277	0.04877	A	T	0.0722	CD24 on IgD+ CD38-	TRUE	reported	textfile
rs2236073	3.86e-08	106898421	3638	0.1396	0.02534	A	G	0.5998	CD24 on IgD+ CD38-	TRUE	reported	textfile
rs9270560	7.22e-06	32560741	3638	-0.1353	0.03012	C	T	0.5884	CD24 on IgD+ CD38-	TRUE	reported	textfile
rs11781090	6.71e-07	144871633	3638	0.1316	0.02643	T	C	0.6622	CD24 on IgD+ CD38-	TRUE	reported	textfile
rs6481230	7.29e-06	58477006	3638	0.1195	0.0266	T	A	0.6579	CD24 on IgD+ CD38-	TRUE	reported	textfile
rs138034828	1.49e-06	111599201	3638	0.2825	0.05859	C	G	0.0482	CD24 on IgD+ CD38-	TRUE	reported	textfile
rs143053604	2.7e-07	12834785	3638	-0.8464	0.1643	G	A	0.0056	CD24 on IgD+ CD38-	TRUE	reported	textfile
rs11176619	9.02e-06	40829042	3638	-0.2677	0.06021	T	G	0.0473	CD24 on IgD+ CD38-	TRUE	reported	textfile
rs59866449	6.39e-06	94556734	3638	-0.2747	0.06079	G	A	0.0429	CD24 on IgD+ CD38-	TRUE	reported	textfile
rs77636548	2.45e-07	43192207	3638	-0.3484	0.06738	C	T	0.0346	CD24 on IgD+ CD38-	TRUE	reported	textfile
rs792792	1.07e-06	51153533	3638	-0.1949	0.03989	T	C	0.885	CD24 on IgD+ CD38-	TRUE	reported	textfile
rs8089264	7.69e-07	46221152	3638	0.2949	0.05956	T	C	0.0469	CD24 on IgD+ CD38-	TRUE	reported	textfile
rs114017670	9.66e-06	40242025	1832	0.3133	0.07061	G	A	0.0614	CD24 on IgD+ CD38- unsw mem	TRUE	reported	textfile
rs139742955	6.57e-06	9926086	1832	0.4927	0.109	C	T	0.0267	CD24 on IgD+ CD38- unsw mem	TRUE	reported	textfile
rs34396417	5.53e-06	121363691	1832	-0.3454	0.07579	C	G	0.0535	CD24 on IgD+ CD38- unsw mem	TRUE	reported	textfile
rs150910045	3.38e-06	148279147	1832	0.1655	0.03551	C	T	0.4078	CD24 on IgD+ CD38- unsw mem	TRUE	reported	textfile
rs1889263	8.08e-06	175401058	1832	-0.4509	0.1007	C	T	0.0287	CD24 on IgD+ CD38- unsw mem	TRUE	reported	textfile
rs2236073	2.92e-09	106898421	1832	0.2114	0.03543	A	G	0.5961	CD24 on IgD+ CD38- unsw mem	TRUE	reported	textfile
rs9400058	3.42e-30	107164076	1832	-0.8239	0.07087	G	A	0.0617	CD24 on IgD+ CD38- unsw mem	TRUE	reported	textfile
rs117218666	4.23e-07	139700367	1832	0.4841	0.09535	T	C	0.0366	CD24 on IgD+ CD38- unsw mem	TRUE	reported	textfile
rs55929002	4.64e-06	33963845	1832	0.2768	0.06026	C	G	0.0936	CD24 on IgD+ CD38- unsw mem	TRUE	reported	textfile
rs783414	1.7e-07	106966701	1832	-0.2432	0.04632	G	A	0.8343	CD24 on IgD+ CD38- unsw mem	TRUE	reported	textfile
rs76624974	2.1e-06	131992482	1832	-0.4227	0.08883	G	A	0.0401	CD24 on IgD+ CD38- unsw mem	TRUE	reported	textfile
rs2283164	8.57e-06	2579163	1832	-0.3336	0.07475	G	A	0.0532	CD24 on IgD+ CD38- unsw mem	TRUE	reported	textfile
rs117488563	7.39e-07	29183168	1832	-0.7224	0.1454	A	G	0.0147	CD24 on IgD+ CD38- unsw mem	TRUE	reported	textfile
rs35851357	9.29e-06	88302344	1832	0.2403	0.05406	A	G	0.1179	CD24 on IgD+ CD38- unsw mem	TRUE	reported	textfile
rs72682699	5.27e-06	44731074	1832	0.3129	0.0685	T	C	0.0718	CD24 on IgD+ CD38- unsw mem	TRUE	reported	textfile
rs74833732	6.99e-06	20362976	1832	1.545	0.3429	A	G	0.0044	CD24 on IgD+ CD38- unsw mem	TRUE	reported	textfile
rs34534209	7.15e-06	30498909	1832	0.5485	0.1218	C	T	0.0207	CD24 on IgD+ CD38- unsw mem	TRUE	reported	textfile
rs16942616	5.77e-06	87098993	1832	-0.4025	0.0885	T	C	0.0401	CD24 on IgD+ CD38- unsw mem	TRUE	reported	textfile
rs4569270	5.45e-06	82557069	1832	-0.2637	0.05783	T	A	0.0988	CD24 on IgD+ CD38- unsw mem	TRUE	reported	textfile
rs75645526	6.29e-06	71565056	1832	0.2308	0.05094	A	G	0.1359	CD24 on IgD+ CD38- unsw mem	TRUE	reported	textfile
rs58241910	6.22e-06	62864471	1832	-0.2836	0.06257	C	T	0.0898	CD24 on IgD+ CD38- unsw mem	TRUE	reported	textfile
rs78409132	4.16e-06	16838053	1832	-0.238	0.05155	C	T	0.128	CD24 on IgD+ CD38- unsw mem	TRUE	reported	textfile
rs6666130	2.25e-06	112374026	3655	-0.2436	0.05141	T	G	0.061	CD24 on IgD+ CD38br	TRUE	reported	textfile
rs114151424	1.4e-07	120674028	3655	1.159	0.2197	A	G	0.0036	CD24 on IgD+ CD38br	TRUE	reported	textfile
rs116032501	5.42e-06	55983064	3655	-0.1879	0.04125	C	A	0.0992	CD24 on IgD+ CD38br	TRUE	reported	textfile
rs59655785	2.18e-06	152494218	3655	0.1174	0.02474	G	A	0.5382	CD24 on IgD+ CD38br	TRUE	reported	textfile
rs146379662	3.47e-06	240272688	3655	0.5365	0.1154	T	C	0.0111	CD24 on IgD+ CD38br	TRUE	reported	textfile
rs181036992	1.59e-06	196496410	3655	-0.4375	0.091	C	T	0.0186	CD24 on IgD+ CD38br	TRUE	reported	textfile
rs78405192	6.72e-06	71295244	3655	1.577	0.3497	C	T	0.0012	CD24 on IgD+ CD38br	TRUE	reported	textfile
rs10056811	1.62e-06	74605220	3655	-0.1322	0.02752	A	G	0.3022	CD24 on IgD+ CD38br	TRUE	reported	textfile
rs139160176	1.61e-06	13902245	3655	-0.9719	0.2023	C	G	0.0034	CD24 on IgD+ CD38br	TRUE	reported	textfile
rs35093039	9.99e-06	24061216	3655	-0.21	0.04748	A	G	0.0755	CD24 on IgD+ CD38br	TRUE	reported	textfile
rs9326867	5.04e-06	112302830	3655	0.1697	0.03713	G	T	0.126	CD24 on IgD+ CD38br	TRUE	reported	textfile
rs9452529	2.09e-06	94734554	3655	-0.5098	0.1073	T	C	0.013	CD24 on IgD+ CD38br	TRUE	reported	textfile
rs9398107	1.28e-15	107155687	3655	-0.4386	0.0546	G	A	0.0555	CD24 on IgD+ CD38br	TRUE	reported	textfile
rs1799693	6.12e-10	106992464	3655	-0.2018	0.03253	G	A	0.8286	CD24 on IgD+ CD38br	TRUE	reported	textfile
rs3097667	1.61e-06	33023723	3655	-0.1519	0.03161	C	G	0.2161	CD24 on IgD+ CD38br	TRUE	reported	textfile
rs7781145	1.09e-06	23626602	3655	-0.1421	0.0291	A	C	0.2397	CD24 on IgD+ CD38br	TRUE	reported	textfile
rs75059545	3.39e-06	129584738	3655	0.1761	0.03786	C	A	0.117	CD24 on IgD+ CD38br	TRUE	reported	textfile
rs10108273	5.28e-06	85737573	3655	0.1701	0.0373	A	T	0.1242	CD24 on IgD+ CD38br	TRUE	reported	textfile
rs45609135	8.31e-06	118942134	3655	-0.1767	0.03959	A	G	0.1085	CD24 on IgD+ CD38br	TRUE	reported	textfile
rs192325628	7.7e-07	121622513	3655	0.4876	0.09848	T	C	0.0164	CD24 on IgD+ CD38br	TRUE	reported	textfile
rs16923647	1.79e-06	21451395	3655	-0.164	0.03428	T	C	0.1542	CD24 on IgD+ CD38br	TRUE	reported	textfile
rs4765854	6.26e-06	1997152	3655	-0.2274	0.05027	C	A	0.0625	CD24 on IgD+ CD38br	TRUE	reported	textfile
rs4368221	4.33e-06	45634445	3655	0.1558	0.03385	C	G	0.1544	CD24 on IgD+ CD38br	TRUE	reported	textfile
rs117920360	8.28e-06	58030683	3655	0.1459	0.03267	T	C	0.1718	CD24 on IgD+ CD38br	TRUE	reported	textfile
rs57680652	9.41e-07	16362072	3655	0.128	0.02606	T	C	0.6404	CD24 on IgD+ CD38br	TRUE	reported	textfile
rs143386390	2.41e-06	6146588	3653	1.197	0.2535	T	C	0.0026	CD24 on memory B cell	TRUE	reported	textfile
rs77875928	8.94e-06	137032557	3653	-0.5589	0.1257	A	G	0.0094	CD24 on memory B cell	TRUE	reported	textfile
rs2902453	1.28e-06	113923281	3653	1.504	0.31	G	A	0.0015	CD24 on memory B cell	TRUE	reported	textfile
rs73214037	6.47e-06	197395630	3653	-1.36	0.301	C	G	0.0021	CD24 on memory B cell	TRUE	reported	textfile
rs4862454	3.67e-07	185816062	3653	-0.139	0.02729	A	G	0.2982	CD24 on memory B cell	TRUE	reported	textfile
rs78023498	7.58e-06	189754606	3653	-0.2073	0.04624	T	G	0.0749	CD24 on memory B cell	TRUE	reported	textfile
rs138093394	8.78e-06	39960496	3653	-1.418	0.3186	T	C	0.0016	CD24 on memory B cell	TRUE	reported	textfile
rs7705021	3.24e-06	79153359	3653	0.1904	0.04084	G	A	0.1005	CD24 on memory B cell	TRUE	reported	textfile
rs72948545	6.21e-45	107168477	3653	-0.7352	0.05156	G	A	0.0586	CD24 on memory B cell	TRUE	reported	textfile
rs150394154	8.99e-06	32556019	3653	0.1485	0.0334	A	G	0.2805	CD24 on memory B cell	TRUE	reported	textfile
rs9390863	6.86e-06	96559132	3653	0.2234	0.04959	A	C	0.0653	CD24 on memory B cell	TRUE	reported	textfile
rs12200293	8.29e-07	101259222	3653	-0.2916	0.05906	A	C	0.0463	CD24 on memory B cell	TRUE	reported	textfile
rs2236073	6e-13	106898421	3653	0.1799	0.0249	A	G	0.5996	CD24 on memory B cell	TRUE	reported	textfile
rs9392365	4.65e-06	2091975	3653	-0.1437	0.03134	T	A	0.1856	CD24 on memory B cell	TRUE	reported	textfile
rs117417471	9.85e-06	56973794	3653	-0.2681	0.06057	G	A	0.0438	CD24 on memory B cell	TRUE	reported	textfile
rs7078071	7.92e-06	124038072	3653	0.2026	0.0453	A	G	0.0803	CD24 on memory B cell	TRUE	reported	textfile
rs192325628	4.45e-06	121622513	3653	0.4523	0.0984	T	C	0.0164	CD24 on memory B cell	TRUE	reported	textfile
rs11023691	6e-06	15732077	3653	0.1134	0.02502	C	A	0.5558	CD24 on memory B cell	TRUE	reported	textfile
rs77604725	4.9e-06	11210672	3653	-0.6964	0.1522	G	A	0.0063	CD24 on memory B cell	TRUE	reported	textfile
rs117918490	8.71e-06	83630901	3653	0.4514	0.1014	A	G	0.0152	CD24 on memory B cell	TRUE	reported	textfile
rs6561591	1.22e-06	51367125	3653	-0.1204	0.02477	C	T	0.5511	CD24 on memory B cell	TRUE	reported	textfile
rs4942468	4.12e-07	46618290	3653	-0.1334	0.0263	A	C	0.6812	CD24 on memory B cell	TRUE	reported	textfile
rs4911068	9.28e-06	85904508	3653	0.1143	0.02574	G	A	0.3767	CD24 on memory B cell	TRUE	reported	textfile
rs117084919	3.45e-06	112826783	3653	0.403	0.08668	G	T	0.0219	CD24 on memory B cell	TRUE	reported	textfile
rs7153153	1.95e-06	89049488	3653	0.1517	0.03183	A	T	0.1852	CD24 on memory B cell	TRUE	reported	textfile
rs144371214	6.2e-06	88425584	3653	0.5084	0.1123	A	T	0.0126	CD24 on memory B cell	TRUE	reported	textfile
rs139648894	6.71e-06	8831083	3653	-0.2573	0.05705	T	C	0.0476	CD24 on memory B cell	TRUE	reported	textfile
rs182058654	7.52e-06	81440009	3653	0.5045	0.1125	T	C	0.0119	CD24 on memory B cell	TRUE	reported	textfile
rs12930821	6.33e-07	58054671	3653	-0.1445	0.02896	C	G	0.7592	CD24 on memory B cell	TRUE	reported	textfile
rs113242537	8.07e-06	75792336	3653	-0.8496	0.1901	A	G	0.0045	CD24 on memory B cell	TRUE	reported	textfile
rs117820766	8.69e-06	61346454	3653	0.6621	0.1487	A	G	0.007	CD24 on memory B cell	TRUE	reported	textfile
rs7246669	2.73e-06	16442023	3653	0.1299	0.02766	G	A	0.7284	CD24 on memory B cell	TRUE	reported	textfile
rs55976703	9.38e-06	35785378	3653	-0.1566	0.0353	T	C	0.1432	CD24 on memory B cell	TRUE	reported	textfile
rs181819396	8.63e-06	191984411	3652	1.195	0.2682	G	C	0.0022	CD24 on sw mem	TRUE	reported	textfile
rs61820496	1.59e-06	158541235	3652	-0.2177	0.04528	A	G	0.0835	CD24 on sw mem	TRUE	reported	textfile
rs116584882	6.87e-06	232401896	3652	-1.154	0.2562	G	A	0.0023	CD24 on sw mem	TRUE	reported	textfile
rs71419048	7.24e-06	156299791	3652	0.3303	0.07352	A	T	0.0285	CD24 on sw mem	TRUE	reported	textfile
rs4629120	9.07e-06	30045059	3652	0.1124	0.02529	T	C	0.4085	CD24 on sw mem	TRUE	reported	textfile
rs17035466	3.91e-06	1249656	3652	0.1183	0.02559	T	C	0.3888	CD24 on sw mem	TRUE	reported	textfile
rs9838297	6.63e-06	150777263	3652	0.5111	0.1133	C	T	0.0118	CD24 on sw mem	TRUE	reported	textfile
rs6799202	2.99e-06	131412454	3652	-0.229	0.04894	T	G	0.9291	CD24 on sw mem	TRUE	reported	textfile
rs12642193	4.96e-06	25916457	3652	-0.155	0.03388	G	A	0.1574	CD24 on sw mem	TRUE	reported	textfile
rs2872004	7.27e-06	131805665	3652	-0.1571	0.03497	T	C	0.8536	CD24 on sw mem	TRUE	reported	textfile
rs149975454	6.56e-06	54436158	3652	0.9799	0.2171	A	G	0.0034	CD24 on sw mem	TRUE	reported	textfile
rs72948545	1.21e-40	107168477	3652	-0.7073	0.05233	G	A	0.0586	CD24 on sw mem	TRUE	reported	textfile
rs7756279	3.82e-06	107458285	3652	-0.1191	0.02574	A	C	0.6435	CD24 on sw mem	TRUE	reported	textfile
rs28672722	5.23e-06	32626537	3652	0.1347	0.02953	T	G	0.3337	CD24 on sw mem	TRUE	reported	textfile
rs76990892	1.92e-06	101131432	3652	0.6135	0.1286	A	T	0.01	CD24 on sw mem	TRUE	reported	textfile
rs2236073	1.46e-11	106898421	3652	0.1709	0.02524	A	G	0.5997	CD24 on sw mem	TRUE	reported	textfile
rs783418	7.61e-08	106962679	3652	-0.1791	0.03324	C	G	0.8338	CD24 on sw mem	TRUE	reported	textfile
rs73602758	2.46e-06	149812163	3652	0.8909	0.1888	G	C	0.004	CD24 on sw mem	TRUE	reported	textfile
rs57225931	9.68e-06	152228997	3652	-0.1396	0.03151	T	C	0.1921	CD24 on sw mem	TRUE	reported	textfile
rs183671978	7.44e-06	124374557	3652	2.05	0.4569	A	G	0.0007	CD24 on sw mem	TRUE	reported	textfile
rs111701276	5.22e-07	28274639	3652	0.885	0.1761	G	A	0.0049	CD24 on sw mem	TRUE	reported	textfile
rs117896078	4.2e-06	130751060	3652	-0.3455	0.07496	T	A	0.0285	CD24 on sw mem	TRUE	reported	textfile
rs147397792	3.04e-06	18427081	3652	0.2079	0.04446	G	T	0.091	CD24 on sw mem	TRUE	reported	textfile
rs141357554	4.35e-06	74099495	3652	-0.6039	0.1313	A	G	0.0094	CD24 on sw mem	TRUE	reported	textfile
rs4427557	4.45e-06	40861756	3652	0.9359	0.2036	T	C	0.0036	CD24 on sw mem	TRUE	reported	textfile
rs10750479	1.7e-06	131277609	3652	-0.147	0.03065	C	G	0.204	CD24 on sw mem	TRUE	reported	textfile
rs147031010	9.89e-06	100147551	3652	-1.484	0.3352	A	G	0.0012	CD24 on sw mem	TRUE	reported	textfile
rs6561591	3.22e-06	51367125	3652	-0.117	0.02509	C	T	0.5509	CD24 on sw mem	TRUE	reported	textfile
rs73251366	8.36e-06	83905396	3652	-0.2063	0.04624	G	A	0.0809	CD24 on sw mem	TRUE	reported	textfile
rs9574429	6.82e-06	80035438	3652	0.114	0.02531	G	A	0.4611	CD24 on sw mem	TRUE	reported	textfile
rs77636548	2.6e-06	43192207	3652	-0.3169	0.06732	C	T	0.0345	CD24 on sw mem	TRUE	reported	textfile
rs2895071	4.4e-07	96894306	3652	0.9306	0.1839	C	T	0.0052	CD24 on sw mem	TRUE	reported	textfile
rs8046913	7.85e-07	58039513	3652	-0.1437	0.02904	A	T	0.749	CD24 on sw mem	TRUE	reported	textfile
rs11568076	2.7e-06	4544520	3652	1.098	0.2337	G	A	0.0029	CD24 on sw mem	TRUE	reported	textfile
rs7214354	9.03e-06	51813250	3652	0.2204	0.04959	G	A	0.9314	CD24 on sw mem	TRUE	reported	textfile
rs11660990	9.4e-06	50763049	3652	-0.1209	0.02726	C	T	0.3042	CD24 on sw mem	TRUE	reported	textfile
rs4808045	9.03e-06	16423035	3652	0.1258	0.02829	T	C	0.7381	CD24 on sw mem	TRUE	reported	textfile
rs6073000	5.99e-07	41777449	3652	0.3159	0.06318	C	T	0.9589	CD24 on sw mem	TRUE	reported	textfile
rs73301642	9.14e-06	59456250	3652	0.795	0.1789	C	T	0.0052	CD24 on sw mem	TRUE	reported	textfile
rs35378339	1.94e-06	32639057	3656	0.1293	0.02712	C	G	0.2779	CD24 on transitional	TRUE	reported	textfile
rs140315354	2.32e-06	161617673	3656	0.1704	0.03602	A	G	0.1355	CD24 on transitional	TRUE	reported	textfile
rs76224749	8.05e-06	238632927	3656	-0.2563	0.05733	T	C	0.0458	CD24 on transitional	TRUE	reported	textfile
rs115246881	9.92e-06	155206362	3656	0.2677	0.06049	A	C	0.0432	CD24 on transitional	TRUE	reported	textfile
rs116100555	7.42e-06	7324854	3656	0.1487	0.03313	A	G	0.1674	CD24 on transitional	TRUE	reported	textfile
rs17778282	1.14e-06	2947538	3656	0.5834	0.1197	T	G	0.0107	CD24 on transitional	TRUE	reported	textfile
rs73018738	8.27e-06	189769692	3656	-0.1976	0.04427	C	T	0.0821	CD24 on transitional	TRUE	reported	textfile
rs10491456	3.58e-06	79152076	3656	0.1886	0.04063	A	G	0.1011	CD24 on transitional	TRUE	reported	textfile
rs12206866	1.32e-16	107159822	3656	-0.4459	0.05365	T	C	0.0559	CD24 on transitional	TRUE	reported	textfile
rs9390863	5.49e-06	96559132	3656	0.2243	0.04928	A	C	0.0652	CD24 on transitional	TRUE	reported	textfile
rs783418	2.04e-06	106962679	3656	-0.1551	0.03261	C	G	0.8338	CD24 on transitional	TRUE	reported	textfile
rs55846017	5.18e-07	106902438	3656	-0.1943	0.03864	A	G	0.1175	CD24 on transitional	TRUE	reported	textfile
rs10245878	7.13e-06	78032692	3656	-0.1437	0.03196	G	A	0.1778	CD24 on transitional	TRUE	reported	textfile
rs17709988	3.15e-06	14420767	3656	0.1687	0.03614	C	G	0.1369	CD24 on transitional	TRUE	reported	textfile
rs117417471	5.69e-06	56973794	3656	-0.2745	0.0604	G	A	0.0438	CD24 on transitional	TRUE	reported	textfile
rs74749898	9.5e-06	128808891	3656	-1.066	0.2404	A	G	0.0025	CD24 on transitional	TRUE	reported	textfile
rs192325628	4.94e-06	121622513	3656	0.4478	0.0979	T	C	0.0164	CD24 on transitional	TRUE	reported	textfile
rs16944983	4e-06	62700919	3656	-0.6478	0.1403	G	T	0.0077	CD24 on transitional	TRUE	reported	textfile
rs148635335	5.95e-06	21787537	3656	-1.596	0.3518	G	A	0.0011	CD24 on transitional	TRUE	reported	textfile
rs117772689	3.59e-06	40633066	3656	-0.3828	0.08249	G	T	0.0222	CD24 on transitional	TRUE	reported	textfile
rs141846315	4.29e-06	173414084	3655	-1.906	0.414	T	C	0.0008	CD24 on unsw mem	TRUE	reported	textfile
rs2902453	8.85e-06	113923281	3655	1.383	0.3109	G	A	0.0015	CD24 on unsw mem	TRUE	reported	textfile
rs112878393	7.3e-06	125610212	3655	0.2119	0.04717	A	G	0.078	CD24 on unsw mem	TRUE	reported	textfile
rs4862454	2.27e-07	185816062	3655	-0.1417	0.02733	A	G	0.2981	CD24 on unsw mem	TRUE	reported	textfile
rs77062870	3.57e-06	168607069	3655	0.8245	0.1776	T	C	0.0051	CD24 on unsw mem	TRUE	reported	textfile
rs74726196	1.2e-06	122019220	3655	-2.858	0.5876	A	G	0.0004	CD24 on unsw mem	TRUE	reported	textfile
[truncated: 2,565 more rows]
